# Supplementary material for: Zipping and unzipping monolayers: switchable monolayer oligomerization and adhesion via thiol–disulfide interconversion
Source: Royal Society of Chemistry journal article supplement (doi:10.1039/c7cc07846c), 2018-01-01

Supporting Information - Zipping and Unzipping Monolayers: Switchable Monolayer Oligomerization and Adhesion via Thiol - Disulfide Interconversion. Jian He, Kyle J. Myerson and Matthew B. Zimmt

| Supporting Information Contents                                                                                                                                                                                                                                   | Starting Page |
|-------------------------------------------------------------------------------------------------------------------------------------------------------------------------------------------------------------------------------------------------------------------|---------------|
| i) Table of Contents                                                                                                                                                                                                                                              | 1             |
| ii) Synthesis of <b>1</b>                                                                                                                                                                                                                                         | 2             |
| iii) TOF-MS and STM Procedures                                                                                                                                                                                                                                    | 5             |
| iv) <a href="#">Fig. S1</a> . STM image (70nm x 70 nm) of monolayer self-assembled by compound <b>1</b>                                                                                                                                                           | 5             |
| v) <a href="#">Fig. S2</a> . TOF mass spectra from monolayers of <b>1</b> on HOPG.                                                                                                                                                                                | 6             |
| a) Statistical analysis of <b>1</b> molecular ion and THAP peak intensities from mass spectra collected at 69 spots on four independent samples                                                                                                                   | 6             |
| b) Individual TOF mass spectra collected from 5 spots used to generate the average spectrum reported in the original manuscript                                                                                                                                   | 7             |
| c) Individual TOF mass spectra collected from 36 spots in a repeat study                                                                                                                                                                                          | 10            |
| d) photo of THAP coated <b>1</b> / HOPG substrate after 36 TOF-MS measurements                                                                                                                                                                                    | 26            |
| e) TOF MS m/z peaks with proposed structural assignments from a monolayer of <b>1</b>                                                                                                                                                                             | 26            |
| vi) <a href="#">Fig. S3</a> . TOF mass spectra following in-situ reaction of monolayer <b>1</b> to form monolayer <b>2a</b>                                                                                                                                       | 28            |
| vii) <a href="#">Fig. S4</a> . TOF mass spectra following incubation of monolayer <b>1</b> with DCM containing $\beta$ -TTP but lacking EDC and DMAP.                                                                                                             | 29            |
| viii) <a href="#">Fig. S5</a> . TOF mass spectra following in-situ reaction of monolayer <b>1</b> to form monolayer <b>2b</b>                                                                                                                                     | 33            |
| (ix) <a href="#">Fig. S6</a> . TOF mass spectra following in-situ reaction of monolayer <b>2a</b> with I <sub>2</sub> in DMF to form monolayer ( <b>3</b> ) <sub>x</sub>                                                                                          | 35            |
| (x) <a href="#">Fig. S7</a> . Alternative views of molecular mechanics minimized model showing next-nearest neighbor TPE <sub>2</sub> disulfide cross-link within one aryl column and thiol side chain approach from different aryl columns.                      | 37            |
| (xi) <a href="#">Fig. S8</a> . TOF mass spectra following in-situ reduction of monolayer ( <b>3</b> ) <sub>x</sub> with DTT to form monolayer <b>3H<sub>2</sub></b>                                                                                               | 38            |
| (xii) <a href="#">Fig. S9</a> . TOF mass spectra of <b>3-H<sub>2</sub></b> monolayer formed by DTT reduction of <b>3-(SR')</b> <sub>2</sub> monolayer (SR' = S(CH <sub>2</sub> ) <sub>2</sub> CO <sub>2</sub> Et).                                                | 44            |
| (xiii) <a href="#">Fig. S10</a> . TOF mass spectra of <b>3-(SR')</b> <sub>2</sub> monolayer (SR' = S(CH <sub>2</sub> ) <sub>2</sub> CO <sub>2</sub> Et) formed via esterification of <b>1</b> monolayer with HO <sub>2</sub> C(CH <sub>2</sub> )SSR' /EDC / DMAP. | 48            |
| (xiv) <a href="#">Fig. S11</a> . TOF mass spectra following in-situ reaction of monolayer <b>3-H<sub>2</sub></b> with I <sub>2</sub> in DMF to form monolayer ( <b>3</b> ) <sub>x</sub>                                                                           | 51            |
| (xv). <a href="#">Fig. S12</a> . TOF mass spectra of <b>3-H<sub>2</sub></b> monolayer formed by treatment of <b>2a</b> monolayer with two (2) cycles of oxidation (I <sub>2</sub> ) / reduction (DTT).                                                            | 51            |
| (xvi). <a href="#">Fig. S13</a> . TOF mass spectra of <b>3-H<sub>2</sub></b> monolayer formed by treatment of <b>2a</b> monolayer with three (3) cycles of oxidation (I <sub>2</sub> ) / reduction (DTT).                                                         | 54            |
| (xvii) <a href="#">Fig. S14</a> . Single core molecule <b>TPE-4</b> structure, monolayer STM image and resistance to o-dichlorobenzene (oDCB) rinsing determined by mass spectra.                                                                                 | 56            |
| (xviii) <a href="#">Fig. S15</a> . Resistance of TPE <sub>2</sub> monolayer <b>1</b> to incubation in oDCB at 19°C determined by mass spectra.                                                                                                                    | 59            |
| (xix) <a href="#">Fig. S16</a> . Resistance of cross-linked disulfide monolayer ( <b>3</b> ) <sub>x</sub> to incubation in 19°C and 60°C oDCB determined by mass spectra after reduction to <b>3-H<sub>2</sub></b> monolayer.                                     | 63            |

## ii) Synthesis of **1**

### Syntheses and Spectral Characterization of new compounds.

Abbreviations: DCM = dichloromethane; DMAP = 4-dimethylaminopyridine; DMF = dimethylformamide; DTT = dithiothreitol; TTPA = 3-tritylthiopropionic acid; EDC = N-(3-Dimethylaminopropyl)-N'-ethylcarbodiimide hydrochloride; Tris = 2-amino-2-(hydroxymethyl)-1,3-propanediol; THAP = 2',4',6'-Trihydroxyacetophenone monohydrate; TEA = triethylamine; THF = tetrahydrofuran; Ts = 4-Toluenesulfonyl.

2,5-Diiodobenzene-1,4-diol, DMAP, 1,6-dibromohexane, 1-octanethiol, DTT, 1-phenyloctane, pentanoic acid, THAP, sodium iodide and cuprous iodide were purchased from Sigma-Aldrich (St. Louis, MO). EDC, TTPA and triphenylphosphine were purchased from Oakwood Chemical (Estill, SC). Iodine was purchased from Alfa Aesar (Ward Hill, MA). Palladium(II) chloride was purchased from Strem Chemicals (Newburyport, MA). Di-tert-butylpyridine was purchased from Combi-Blocks (San Diego, CA). HPLC grade solvents (DCM, chloroform, ethyl acetate, THF, TEA, ethanol, DMSO and DMF), potassium carbonate and potassium hydroxide were purchased from Fisher Scientific (Pittsburgh, PA).

Dry Solvent: Anhydrous and oxygen-free solvents were collected from a solvent column system.<sup>1</sup> All reactions were carried out in flame-dried glass containers under argon atmosphere.

Column Chromatography: Flash column chromatography was run on silica gel (60Å, 230-400 mesh). The eluting solvent was chosen to generate an R<sub>f</sub> of 0.15-0.35 of the desired product. Column fractions were analyzed by thin layer chromatography (coated with fluorescent indicator F254) and visualized using a UV lamp (254nm) or phosphomolybdic acid (PMA) as stain.

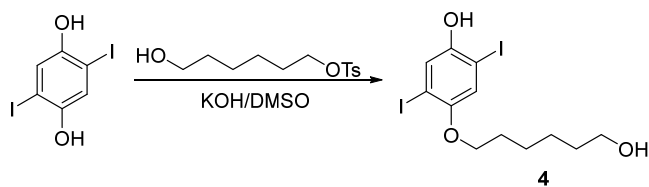

**4-((6-hydroxyhexyl)oxy)-2,5-diiodophenol (**4**)**. Into a 5mL microwave tube were added 2,5-diiodobenzene-1,4-diol (208mg, 0.58mmol), potassium hydroxide (40mg, 0.71mmol) and a stirring bar. The tube was sealed with an aluminum cap with septum, degassed under vacuum and refilled with argon a total of three times. Into a sealed 5mL round-bottom flask were added 6-hydroxyhexyl 4-methylbenzenesulfonate<sup>2</sup> (158mg, 0.58mmol) and DMSO (2mL). The DMSO solution was sparged with argon for 10 minutes and then transferred to the microwave tube using syringes under argon. The mixture was stirred at room temperature for 19 hours. Work-up and purification: The reaction mixture was quenched with 0.5M HCl and extracted with ethyl acetate. The organic layer was washed with

1) A. B. Pangborn, M. A. Giardello, R. H. Grubbs, R. K. Rosen, F. Timmers, *J. Organometallics*, **1996**, 15, 1518-1520.

2) J. He, C. Fang, R. A. Shelp and M. B. Zimmt, *Langmuir*, **2017**, 33, 459-467.

water, brine and dried over anhydrous  $\text{Na}_2\text{SO}_4$ . The solvent was removed under reduced pressure. The crude product was purified by a flash column (30% ethyl acetate/hexanes) to afford 4-((6-hydroxyhexyl)oxy)-2,5-diiodophenol; pale solid; Yield: 85mg (32%).

$^1\text{H}$  NMR (400MHz, acetone- $d_6$ )  $\delta$  8.96 (br, 1H), 7.37 (s, 1H), 7.27 (d, 1H), 4.01 (t,  $J = 6.4\text{Hz}$ , 2H), 3.58 (t,  $J = 6.2\text{Hz}$ , 2H), 3.16 (br, 1H), 1.80 (quint,  $J = 6.9\text{Hz}$ , 2H), 1.60-1.42 (m, 6H).

$^{13}\text{C}$  NMR (100MHz, acetone- $d_6$ )  $\delta$  152.16, 151.71, 124.45, 122.57, 86.19, 83.27, 69.98, 61.60, 32.81, 29.12, 25.84, 25.47.

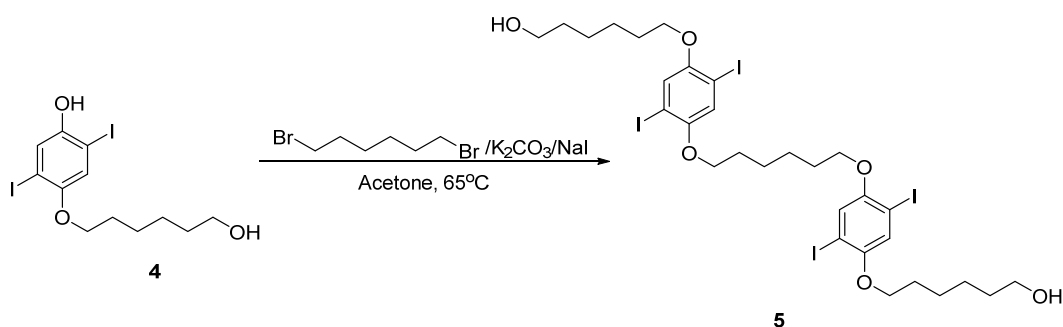

**6,6'-(((hexane-1,6-diylbis(oxy))bis(2,5-diiodo-4,1-phenylene))bis(oxy))bis(hexan-1-ol) (5).** Into a 2mL microwave tube were added compound 4 (85mg, 0.18mmol), potassium carbonate (52mg, 0.38mmol) and sodium iodide (4mg, 0.027mmol). The tube was sealed with an aluminum cap with septum, degassed under vacuum and refilled with argon three times. Into a sealed 5mL round-bottom flask were added 1,6-dibromohexanes (21mg, 0.086mmol) and acetone (1mL). The acetone solution was sparged with argon for 5 minutes and then transferred to the microwave tube using syringes under argon. The reaction mixture was stirred at  $65^\circ\text{C}$  for 18 hours. Work-up and purification: The reaction mixture was cooled to room temperature, quenched with 0.5M HCl and extracted with ethyl acetate. The organic layer was washed with water, brine and dried over anhydrous  $\text{Na}_2\text{SO}_4$ . The solvent was removed under reduced pressure. The crude product was purified by a flash column (30% ethyl acetate/DCM) to afford 6,6'-(((hexane-1,6-diylbis(oxy))bis(2,5-diiodo-4,1-phenylene))bis(oxy))bis(hexan-1-ol); white solid; Yield: 58mg (67%).

$^1\text{H}$  NMR (400MHz,  $\text{CDCl}_3$ )  $\delta$  7.19 (s, 2H), 7.18 (s, 2H), 3.98 (t,  $J = 6.3\text{Hz}$ , 4H), 3.95 (t,  $J = 6.3\text{Hz}$ , 4H), 3.69 (t,  $J = 6.5\text{Hz}$ , 4H), 1.86 (m, 8H), 1.68-1.43 (m, 16H).

$^{13}\text{C}$  NMR (100MHz,  $\text{CDCl}_3$ )  $\delta$  152.83, 152.81, 122.80, 122.74, 86.36, 86.31, 70.18, 69.98, 62.92, 32.69, 29.11, 28.96, 25.91, 25.50, 25.44.

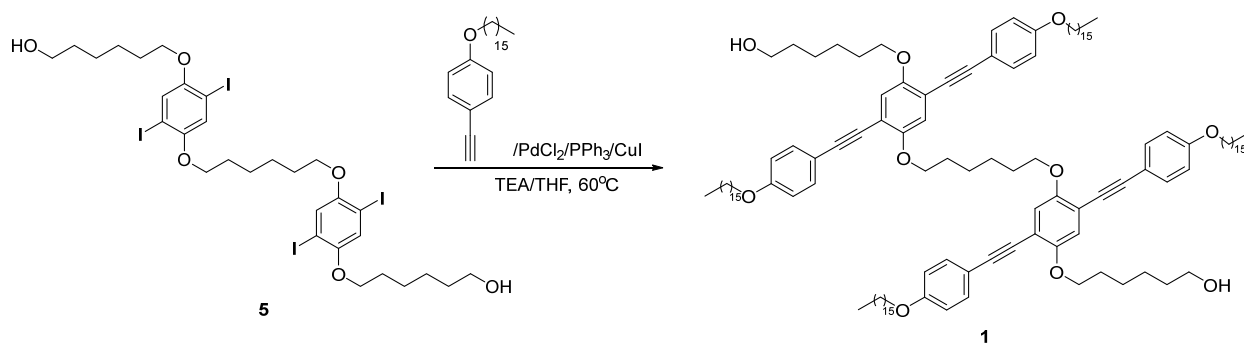

**6,6'-(((hexane-1,6-diylbis(oxy))bis(2,5-bis((4-(hexadecyloxy)phenyl)ethynyl)-4,1-phenylene))bis(oxy))bis(hexan-1-ol) (1).** Into a 5mL microwave tube were added compound **5** (44mg, 0.044mmol), 1-ethynyl-4-(hexadecyloxy)benzene<sup>2</sup> (72mg, 0.21mmol), palladium chloride (2mg, 0.01mmol), cuprous iodide (2mg, 0.01mmol) and triphenylphosphine (7mg, 0.03mmol). The tube was sealed with an aluminum cap with septum, degassed under vacuum and refilled with argon three times. THF (2mL) and TEA (0.5mL) were then added to the tube using syringes. The reaction mixture was sparged with argon for 5 minutes and stirred at 60°C for 16 hours. Work-up and purification: The reaction mixture was cooled to room temperature and quenched with saturated NH<sub>4</sub>Cl solution. The mixture was extracted with DCM. The organic layer was washed with water, brine and dried over anhydrous Na<sub>2</sub>SO<sub>4</sub>. The solution was concentrated under reduced pressure. The crude product was purified by a flash column (2% ethyl acetate/DCM) to afford 6,6'-(((hexane-1,6-diylbis(oxy))bis(2,5-bis((4-(hexadecyloxy)phenyl)ethynyl)-4,1-phenylene))bis(oxy))bis(hexan-1-ol); yellowish solid; Yield: 52mg (63%).

<sup>1</sup>H NMR (400MHz, CDCl<sub>3</sub>) δ 7.48 (d, *J* = 4.4Hz, 4H), 7.46 (d, *J* = 4.4Hz, 4H), 7.00 (s, 2H), 6.99 (s, 2H), 6.88 (d, *J* = 4.4Hz, 4H), 6.84 (d, *J* = 4.4Hz, 4H), 4.04 (t, *J* = 6.3Hz, 4H), 4.03 (t, *J* = 6.2Hz, 4H), 3.99 (t, *J* = 6.6Hz, 4H), 3.92 (t, *J* = 6.6Hz, 4H), 3.66 (t, *J* = 6.5Hz, 4H), 1.92-1.28 (m, 136H), 0.90 (t, *J* = 6.8Hz, 12H).

<sup>13</sup>C NMR (100MHz, CDCl<sub>3</sub>) δ 159.27, 153.50, 153.45, 132.99, 116.87, 115.38, 115.26, 114.53, 114.08, 113.98, 95.06, 94.91, 84.67, 84.61, 69.48, 68.11, 68.07, 62.93, 32.74, 31.95, 29.73, 29.69, 29.66, 29.63, 29.61, 29.46, 29.44, 29.39, 29.37, 29.33, 29.24, 26.05, 25.94, 25.54, 14.15.

MALDI-TOF Mass Spectrum (THAP matrix) 1864.0 (observed [M+H]<sup>+</sup>, expected 1864.4 [M+H]<sup>+</sup>)

iii) TOF-MS and STM Procedures

TOF-MS Procedures

a) Sample air dried then pumped 30 minutes 5 mm Hg prior to THAP application  
b) 10-12  $\mu\text{L}$  of 5 mg/mL THAP matrix in 30/70 acetone/hexane applied and allowed to air dry  
c) TOF-MS data collected on a Bruker Daltonics Autoflex MALDI-TOF massspectrometer (Billerica, MA) running in linear mode. Sample holder (MTP PAC Frame) modifications to hold the HOPG substrate described in Langmuir 2017, 33, 459–467 (DOI: 10.1021/acs.langmuir.6b03252). HOPG substrates irradiated using the SmartbeamTM-II Nd:YAG laser (355 nm) 6\_ultra laser profile operating at 1 kHz. Data was collected in positive ion mode using 500 laser shots at 70% of full laser power (60% for compound **1**), a TOF accelerating voltage of 19.45 kV, a grid voltage of 18.1 kV and pulsed ion extraction time of 90  $\mu\text{s}$ . Instrument calibration for HOPG within the pressure mounted cell was performed using Bruker Daltonics Peptide Calibration Standard II.

STM Procedures

3-5  $\mu\text{L}$  of 12  $\mu\text{M}$  **1** (25%  $\text{CHCl}_3$  / phenyloctane) was drop cast on a freshly peeled 12 mm x 12 mm HOPG substrate. After sitting five minutes, the monolayer / graphite was rinsed with 20  $\mu\text{L}$  phenyloctane. For annealed samples (Fig. 2), the graphite was placed monolayer side down in 10  $\mu\text{L}$  of phenyloctane or 10% 1-nonanol / phenyloctane in a sealable chamber and annealed two hours at 60°C. The sample was rinsed with 20  $\mu\text{L}$  phenyloctane before STM or performing reaction chemistry.

Scanning was initiated using a freshly cut 80/20 Pt/Ir tip (Bias voltage -1.2 V, set current 30 - 35 pA, scan rate, 5 - 7 Hz). All STM data was collected on a VEECO MS-10 STM instrument. Collected images were flattened.

iv) **Fig. S1.** STM image (70nm x 70 nm) of monolayer self-assembled by compound **1**.

(1.4V, 43 pA, 2.77 Hz )

Drop cast 3 $\mu\text{L}$  of 12.5 $\mu\text{M}$  **1** in 25%  $\text{CHCl}_3$  / phenyloctane on freshly cleaved HOPG;

Annealed 2 hrs then rinsed rinsed with 20 $\mu\text{L}$  phenyloctane prior to imaging.

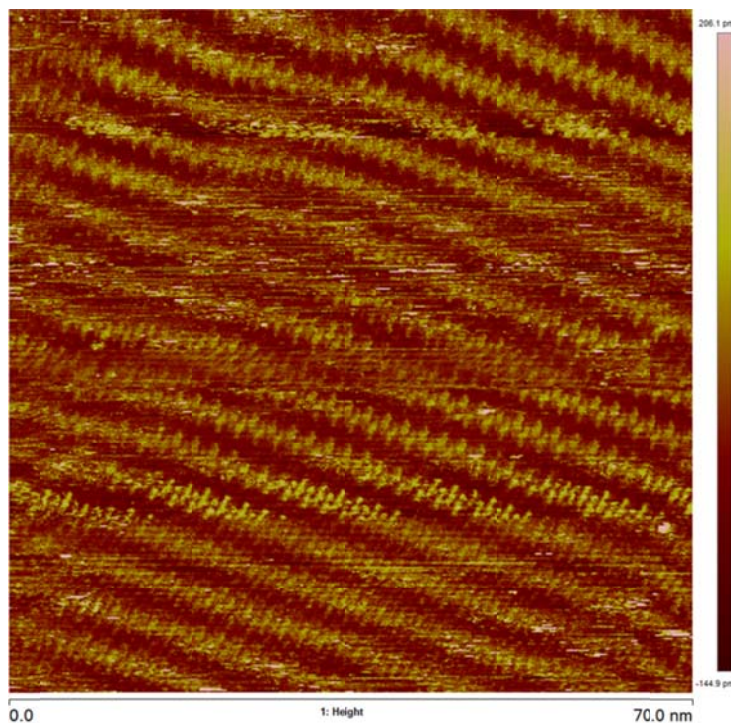

**v) Fig. S2.** TOF mass spectra from monolayers of **1** on HOPG. a) Statistical analysis of **1** molecular ion and THAP peak intensities from mass spectra collected at 69 spots on four independent samples; b) Individual TOF mass spectra collected from 5 spots used to generate the average spectrum reported in the original manuscript; c) Individual TOF mass spectra collected from 36 spots in a repeat study in December 2017 (see Figs. S4 and S15 for mass spectra at 28 spots measured in these two other studies); d) photo of THAP coated **1** / HOPG substrate after 36 TOF-MS measurements; e) MS peak / fragment assignments.

a) Summary and statistical analysis of mass spectra peak intensities from measurements performed on monolayers assembled from **1**.

| measurement                                                        | samples | m/z   | assignment                      | Int. minimum | Int. maximum | Intensity average | Intensity st.dev. | st.dev. / < Int. > |
|--------------------------------------------------------------------|---------|-------|---------------------------------|--------------|--------------|-------------------|-------------------|--------------------|
| Reported in text                                                   | 5       | 169.3 | matrix ([THAP+H] <sup>+</sup> ) | 58000        | 78500        | 65100             | 9200              | 0.14               |
| Rinse study (S15)                                                  | 10      | 169.3 | matrix ([THAP+H] <sup>+</sup> ) | 57600        | 79600        | 67200             | 8500              | 0.13               |
| βTTP control (S4)                                                  | 18      | 169.3 | matrix ([THAP+H] <sup>+</sup> ) | 44800        | 86600        | 68000             | 12000             | 0.18               |
| Repeat (left)                                                      | 18      | 169.3 | matrix ([THAP+H] <sup>+</sup> ) | 56500        | 81400        | 73000             | 6600              | 0.09               |
| Repeat (right)                                                     | 18      | 169.3 | matrix ([THAP+H] <sup>+</sup> ) | 57400        | 85300        | 72800             | 8400              | 0.12               |
| Repeat (l & r)                                                     | 36      | 169.3 | matrix ([THAP+H] <sup>+</sup> ) | 56500        | 85300        | 73000             | 7500              | 0.10               |
| Original                                                           | 5       | 1864  | [ <b>1</b> + H] <sup>+</sup>    | 28600        | 59300        | 43400             | 13200             | 0.30               |
| Rinse study (S15)                                                  | 10      | 1864  | [ <b>1</b> + H] <sup>+</sup>    | 20400        | 59200        | 39000             | 11700             | 0.30               |
| βTTP control (S4)                                                  | 18      | 1864  | [ <b>1</b> + H] <sup>+</sup>    | 28000        | 57700        | 38900             | 10200             | 0.26               |
| Repeat (left)                                                      | 18      | 1864  | [ <b>1</b> + H] <sup>+</sup>    | 27900        | 63400        | 45400             | 9900              | 0.22               |
| Repeat (right)                                                     | 18      | 1864  | [ <b>1</b> + H] <sup>+</sup>    | 35600        | 68900        | 52700             | 8800              | 0.17               |
| Repeat (l & r)                                                     | 36      | 1864  | [ <b>1</b> + H] <sup>+</sup>    | 27900        | 68900        | 49000             | 10000             | 0.20               |
| 4 independently prepared monolayers of <b>1</b> on HOPG substrates | 69      | 1864  | [ <b>1</b> + H] <sup>+</sup>    | 20400        | 68900        | 44600             | 11400             | 0.26               |

Jian He, Kyle J. Myerson and Matthew B. Zimmt

b) TOF mass spectra from monolayer of **1**. TOF-MS molecular ion region (left, Intensity (y) axis scale 0-60000) and 0-2.5kD region (right, intensity (y) axis scale 0-80000) from five locations sampled and then averaged to produce the compound **1** monolayer TOF-MS spectra displayed in the originally submitted manuscript. (x,y) are coordinates in microns at which data was collected (relative to the sample carrier reference position).

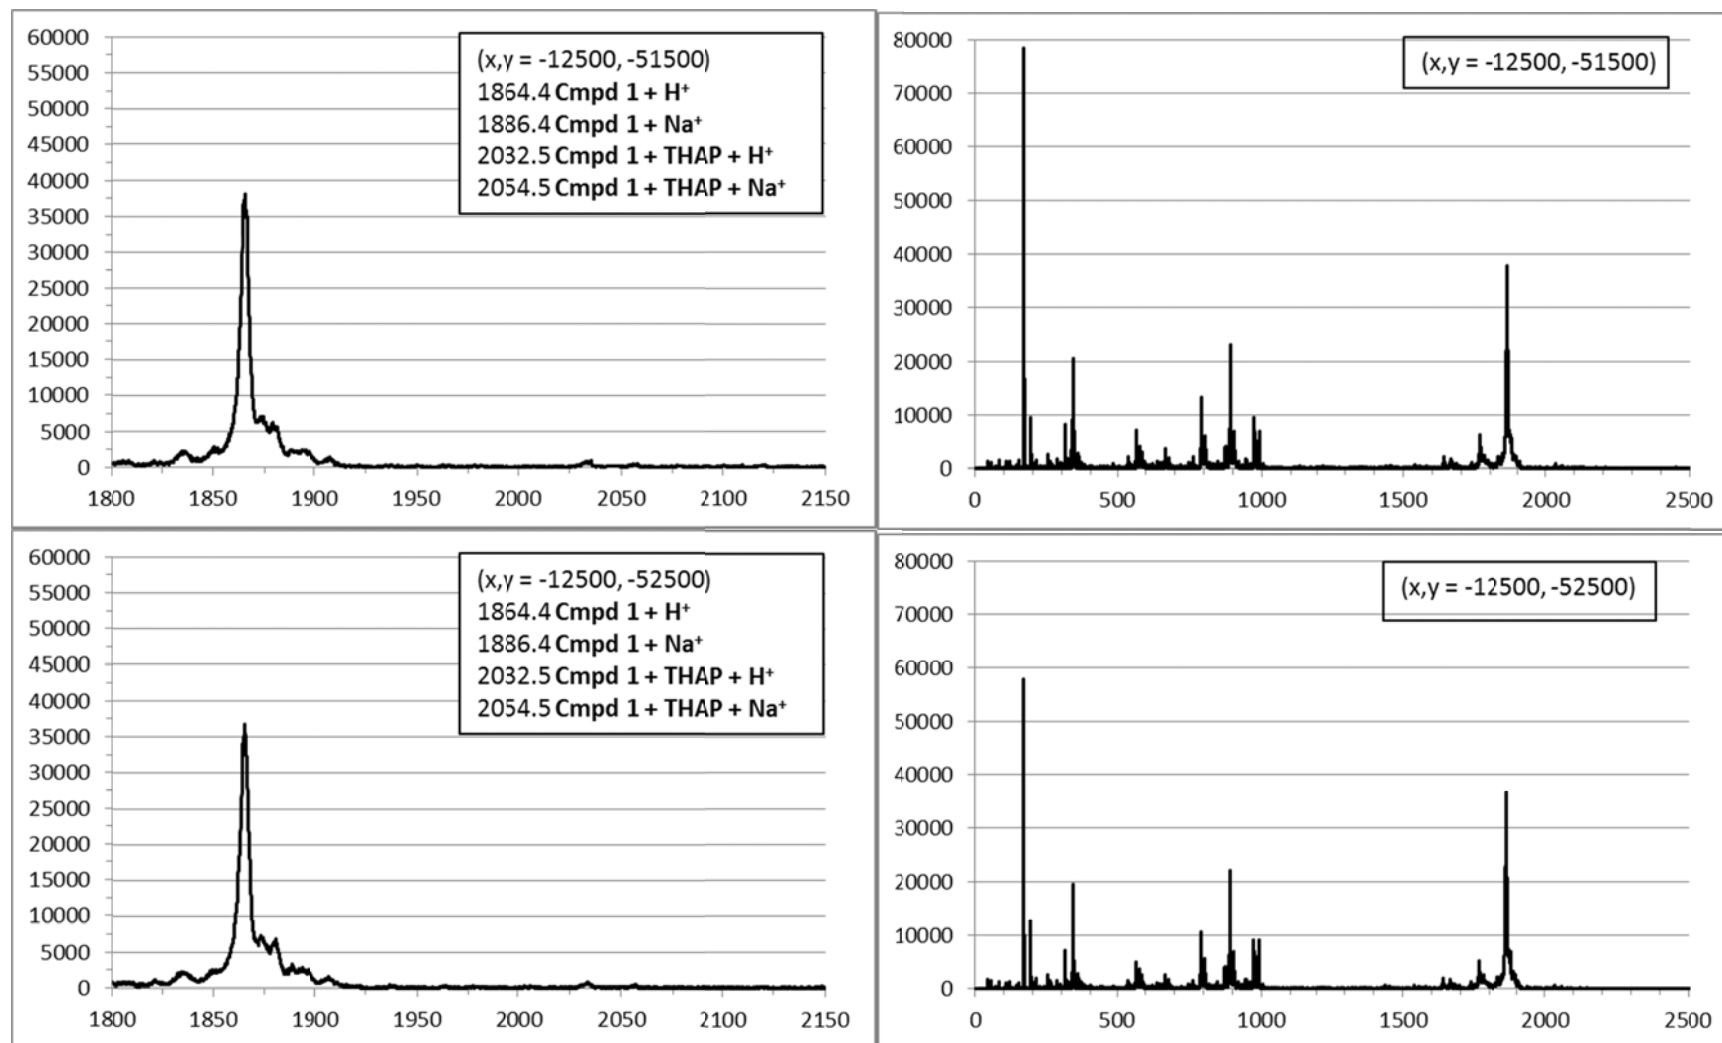

Supporting Information - Zipping and Unzipping Monolayers: Switchable Monolayer Oligomerization and Adhesion via Thiol - Disulfide Interconversion.  
Jian He, Kyle J. Myerson and Matthew B. Zimmt

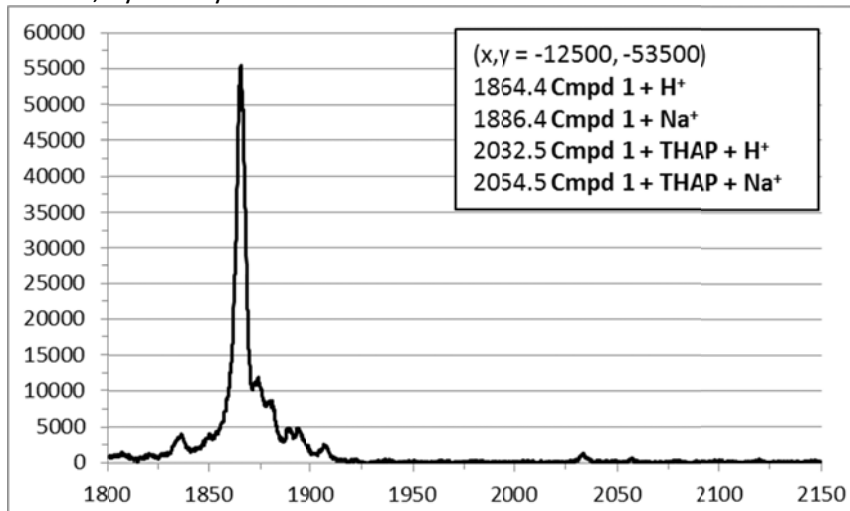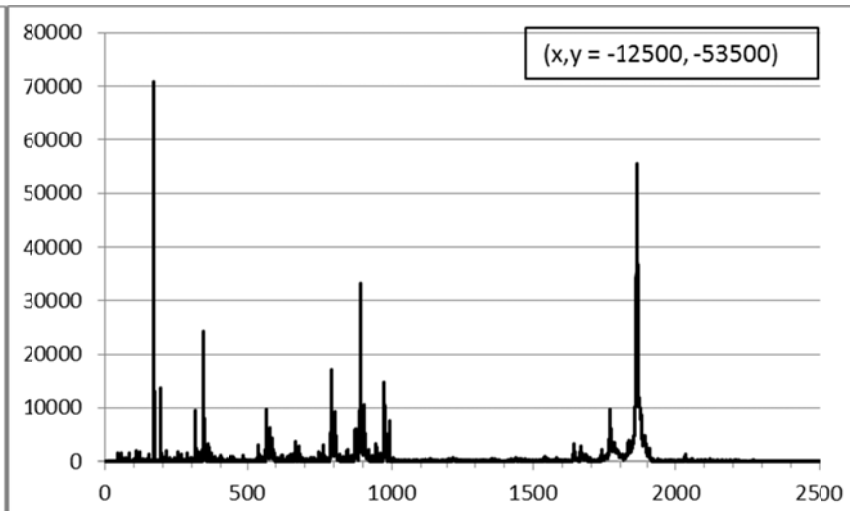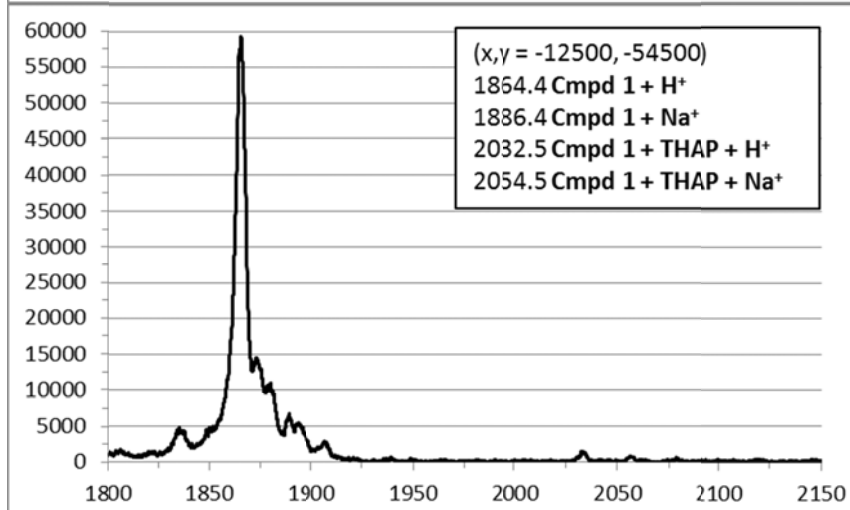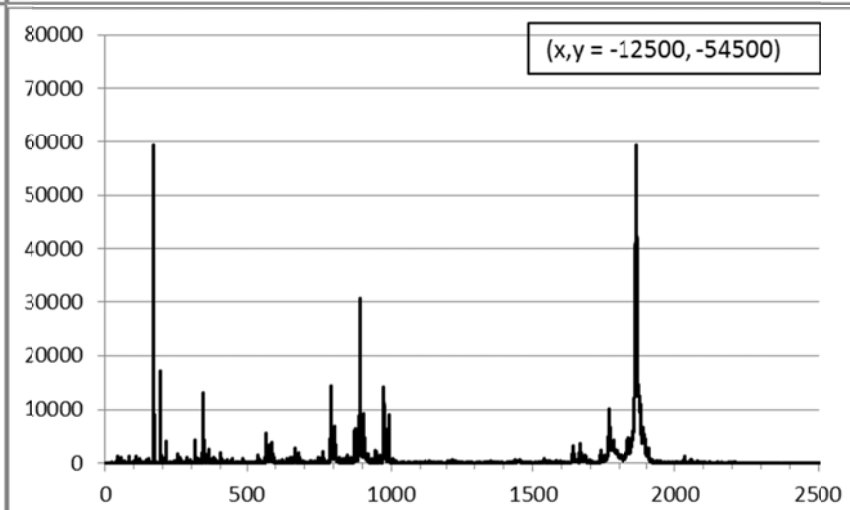



Supporting Information - Zipping and Unzipping Monolayers: Switchable Monolayer Oligomerization and Adhesion via Thiol - Disulfide Interconversion.  
Jian He, Kyle J. Myerson and Matthew B. Zimmt

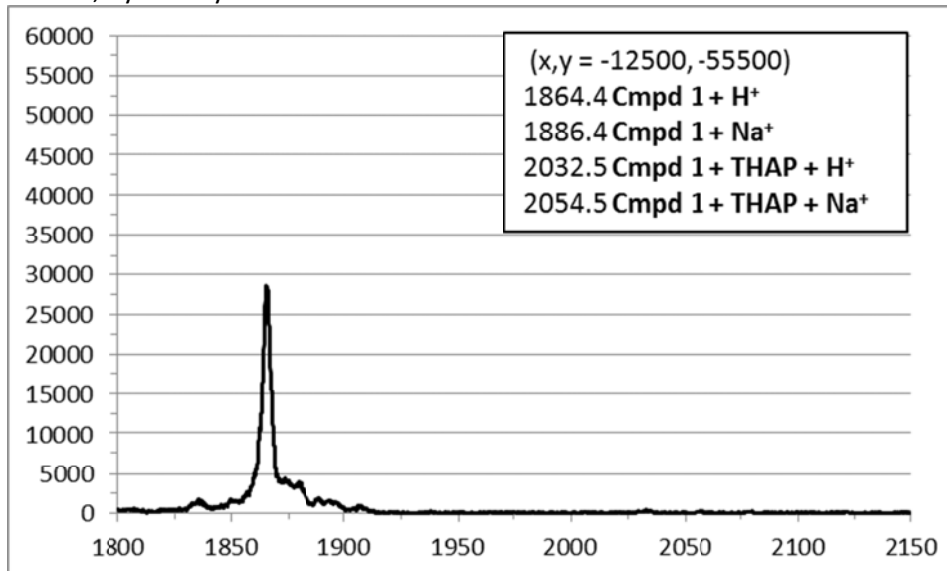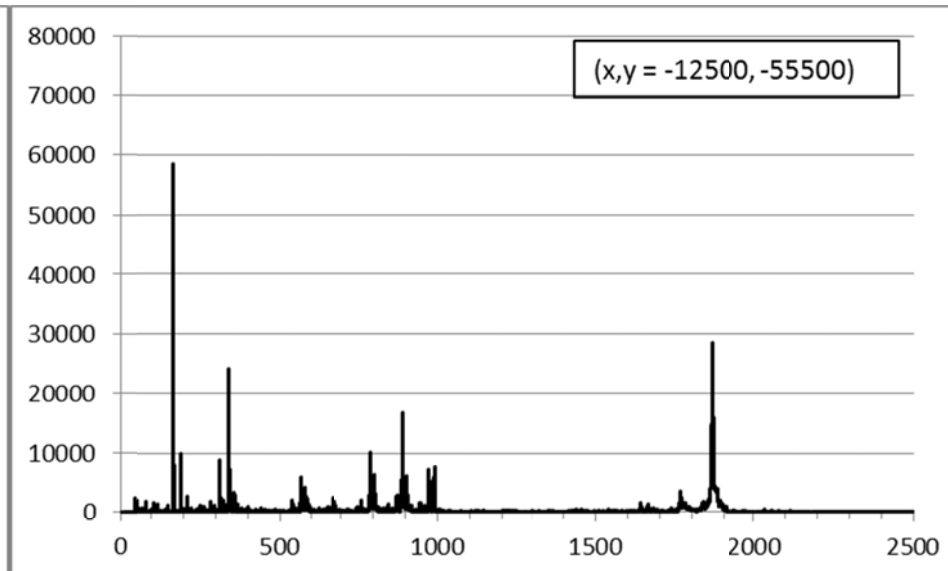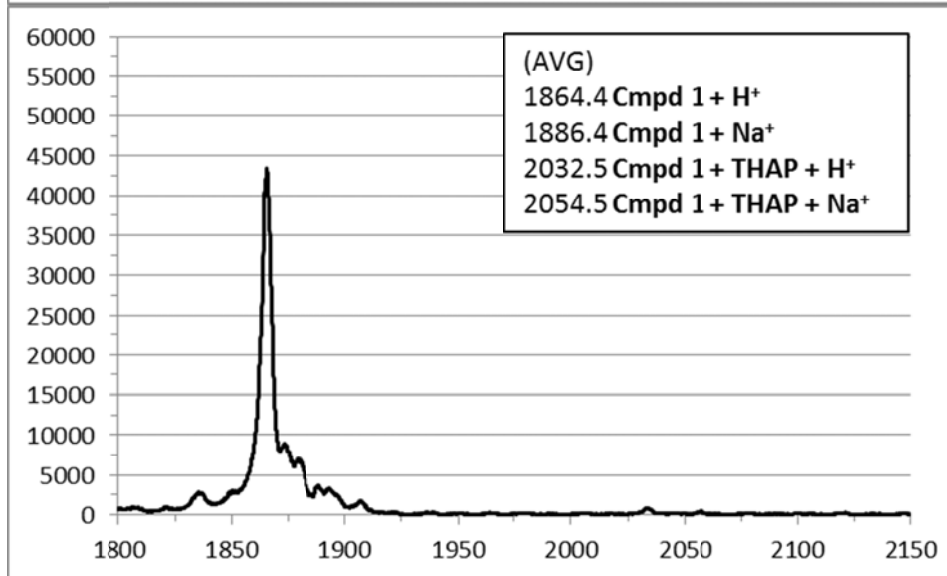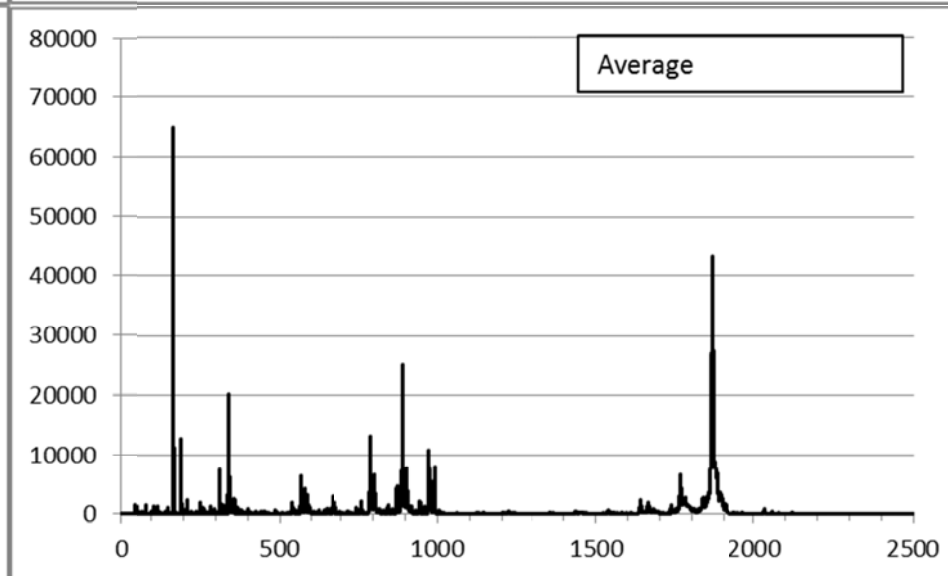

Supporting Information - Zipping and Unzipping Monolayers: Switchable Monolayer Oligomerization and Adhesion via Thiol - Disulfide Interconversion.

Jian He, Kyle J. Myerson and Matthew B. Zimmt

c) TOF mass spectra from monolayer of **1**. TOF-MS molecular ion regions (Intensity (y) axis scale 0-70000) and 0-2.5kD regions (Intensity (y) axis scale 0-90000) from 36 locations sampled and then averaged (in groups of 5 or 4) for a repeat study of molecular ion intensities generated from a monolayer of compound **1**.

TOF-MS molecular ion region (this page) and 0-2.5 kD region (next page) from positions 1, 3, 5, 7, 9 of the left most column (and their average) of **1** monolayer

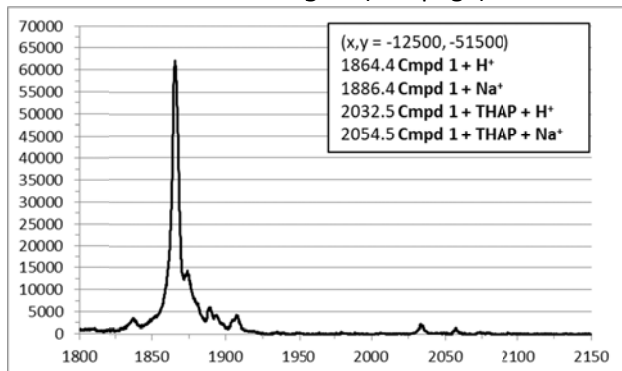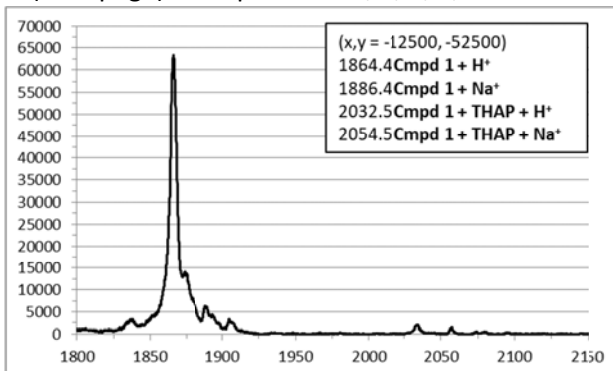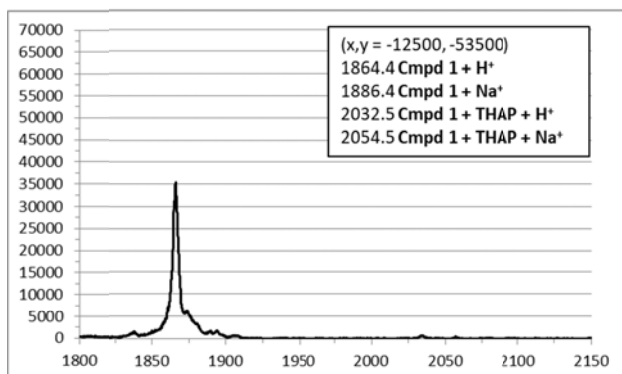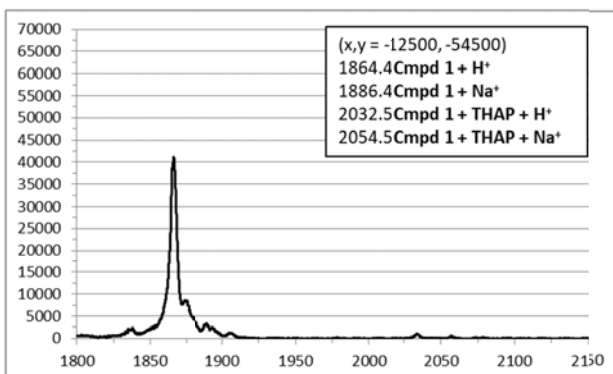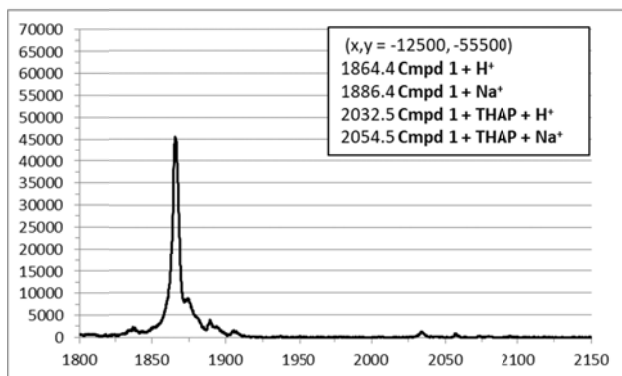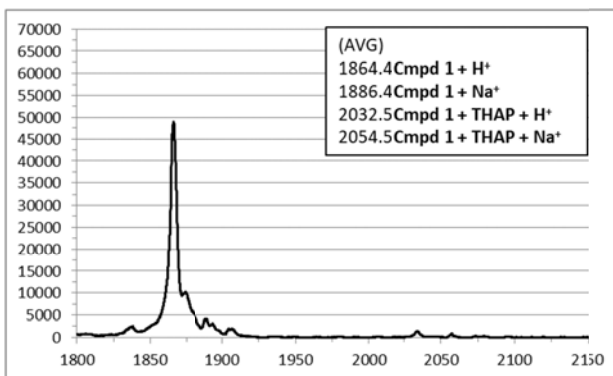

Supporting Information - Zipping and Unzipping Monolayers: Switchable Monolayer Oligomerization and Adhesion via Thiol - Disulfide Interconversion.  
Jian He, Kyle J. Myerson and Matthew B. Zimmt

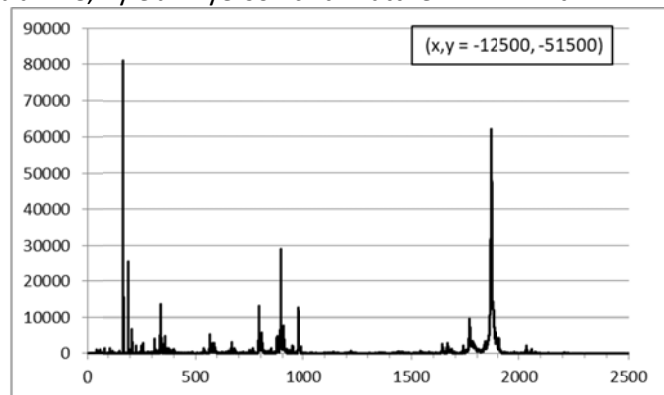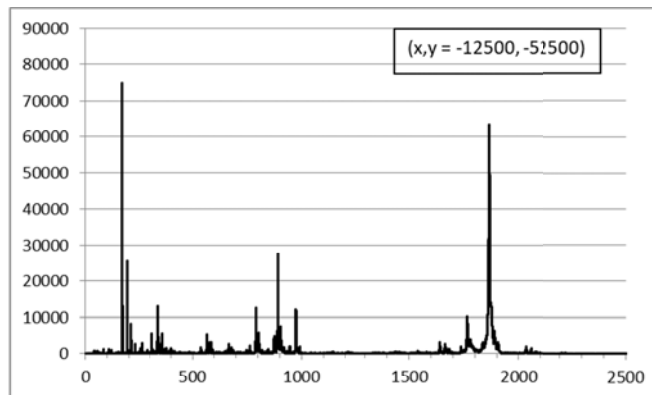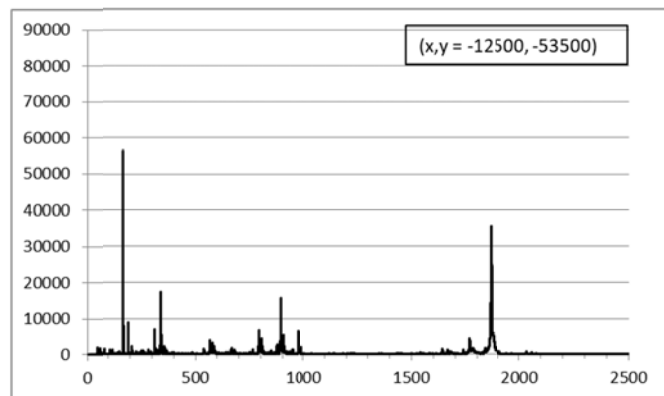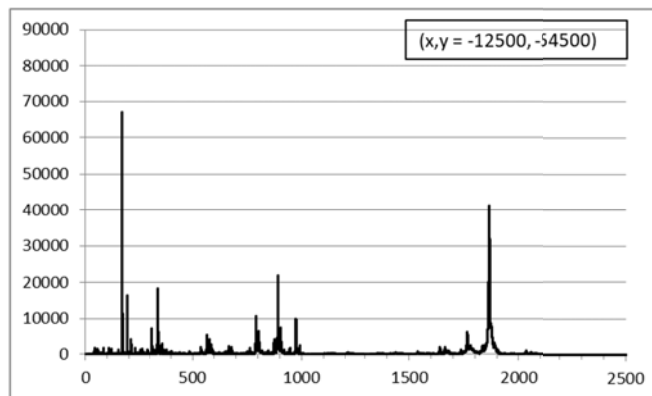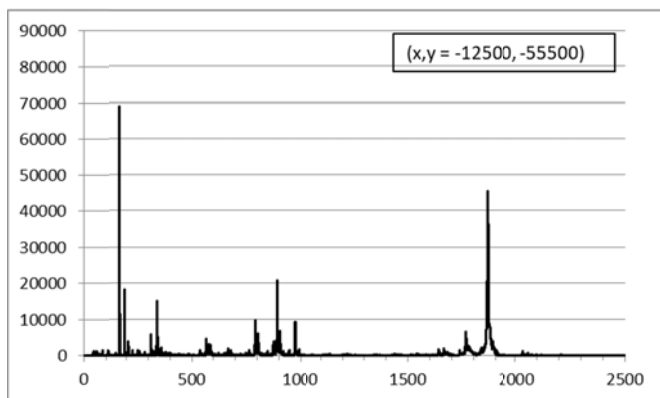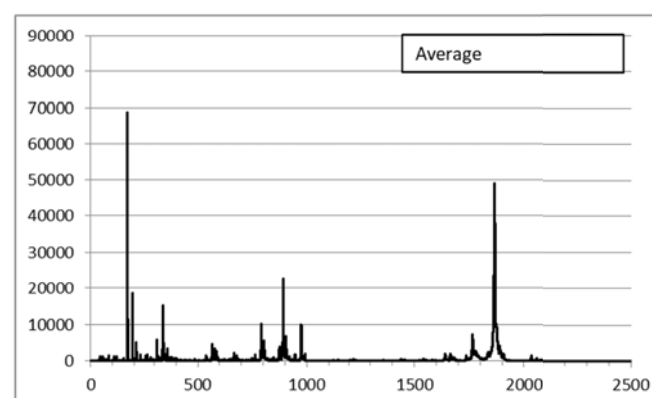

Supporting Information - Zipping and Unzipping Monolayers: Switchable Monolayer Oligomerization and Adhesion via Thiol - Disulfide Interconversion.  
Jian He, Kyle J. Myerson and Matthew B. Zimmt

TOF-MS molecular ion region (this page) and 0-2.5 kD region (next page) from positions 2, 4, 6, 8 of the left most column (and their average) of 1 monolayer

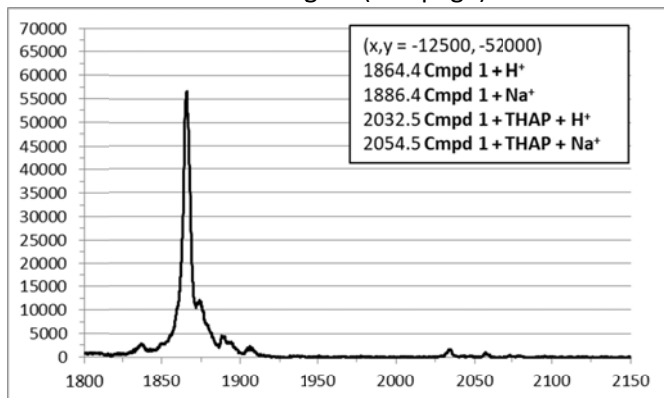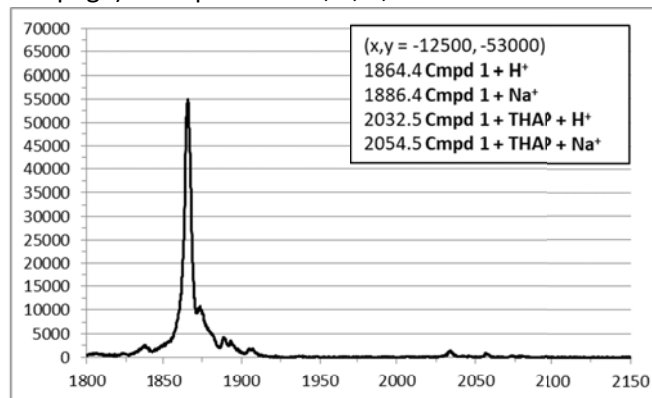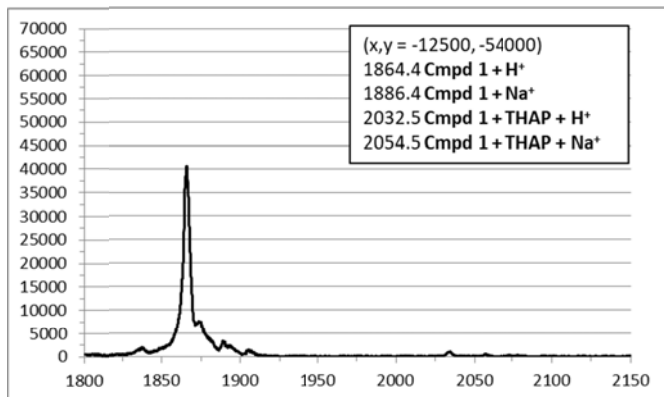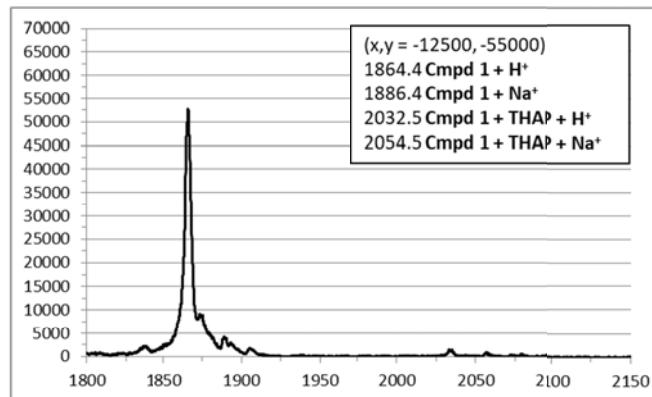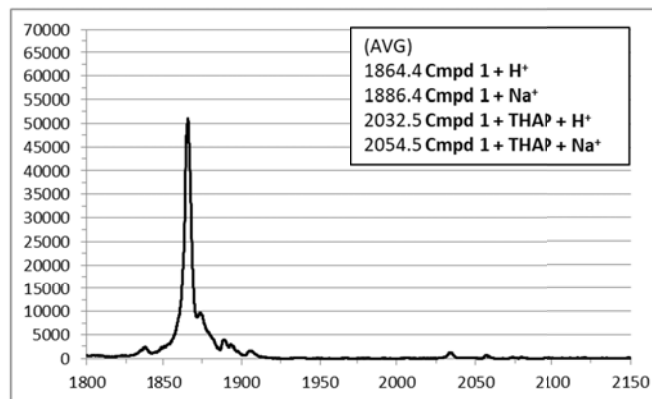

Supporting Information - Zipping and Unzipping Monolayers: Switchable Monolayer Oligomerization and Adhesion via Thiol - Disulfide Interconversion.  
Jian He, Kyle J. Myerson and Matthew B. Zimmt

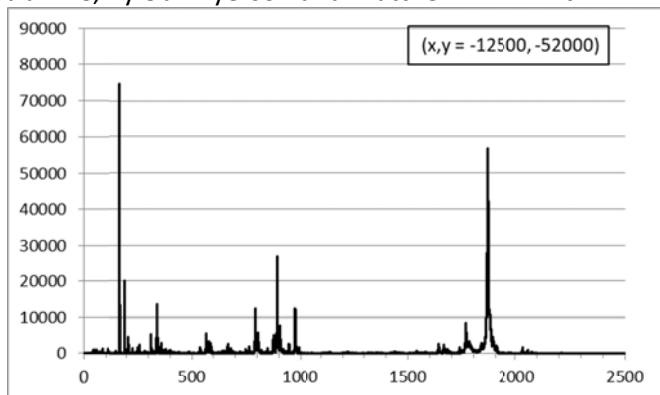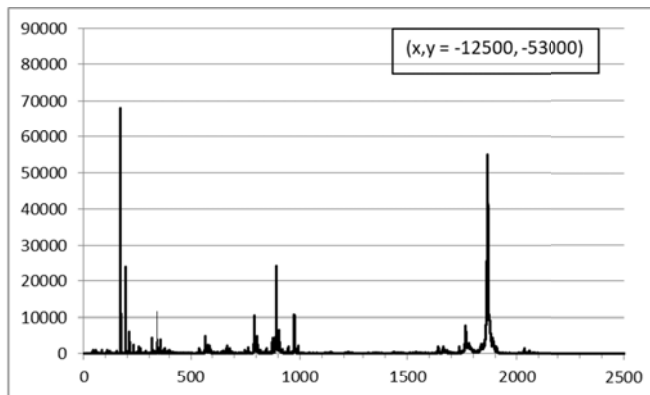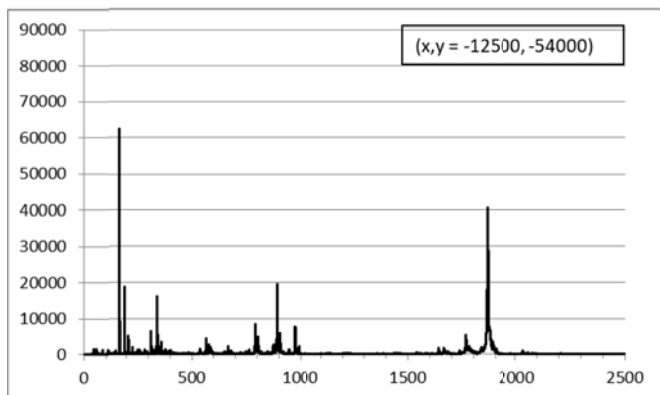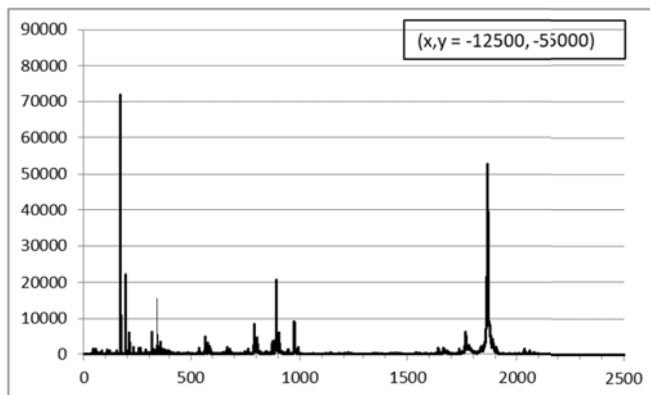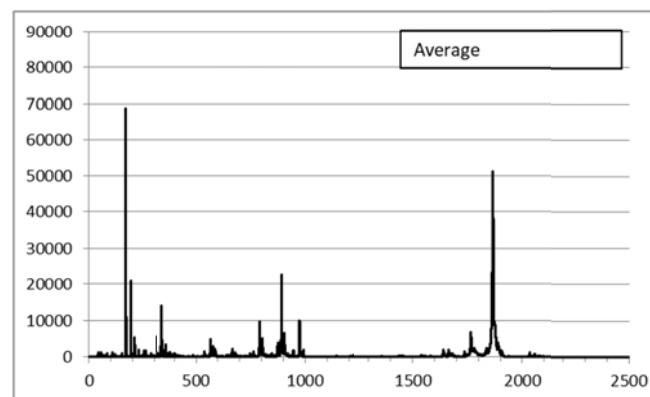

Supporting Information - Zipping and Unzipping Monolayers: Switchable Monolayer Oligomerization and Adhesion via Thiol - Disulfide Interconversion.

Jian He, Kyle J. Myerson and Matthew B. Zimmt

TOF-MS molecular ion region (this page) and 0-2.5 kD region (next page) from positions 1, 3, 5, 7, 9 of the 2<sup>nd</sup> column from the left (and their average) **1 ML**

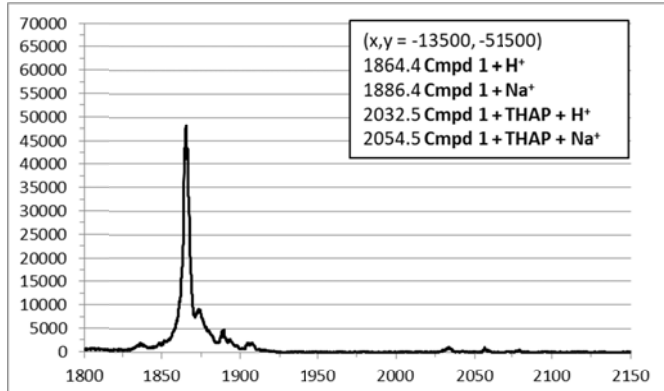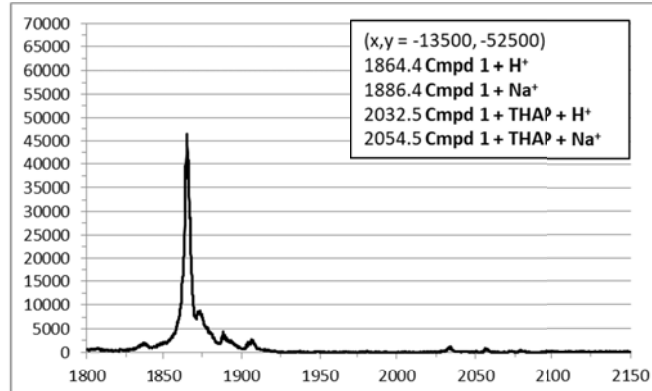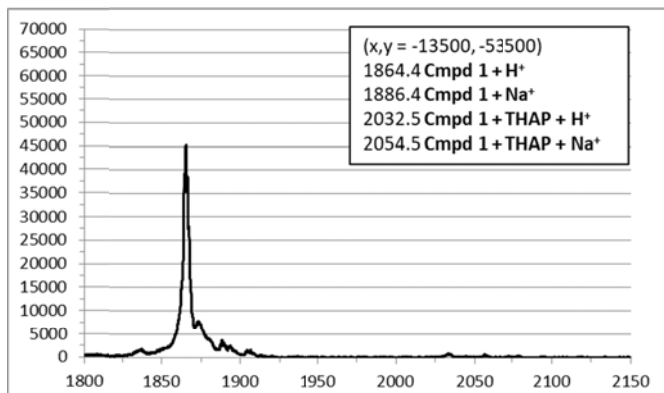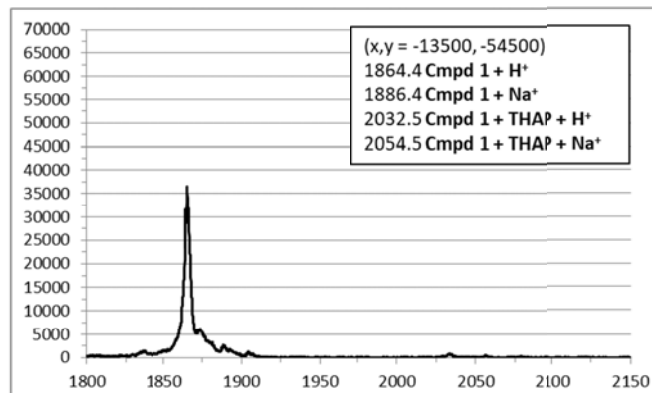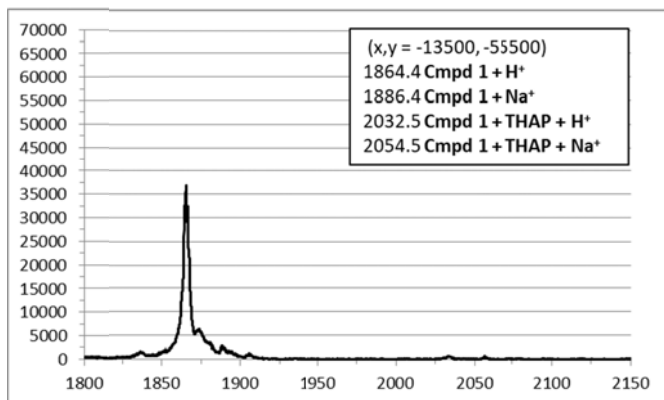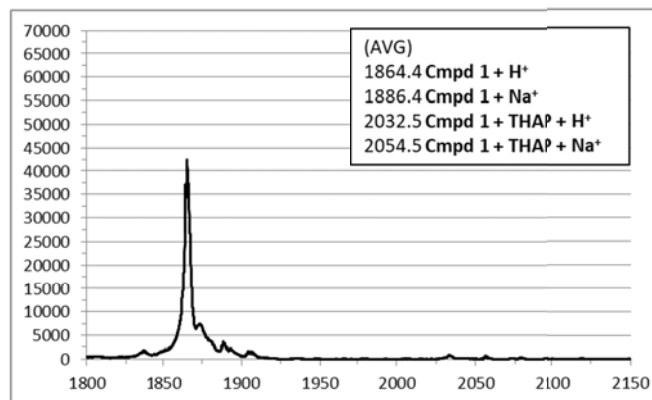

Supporting Information - Zipping and Unzipping Monolayers: Switchable Monolayer Oligomerization and Adhesion via Thiol - Disulfide Interconversion.  
Jian He, Kyle J. Myerson and Matthew B. Zimmt

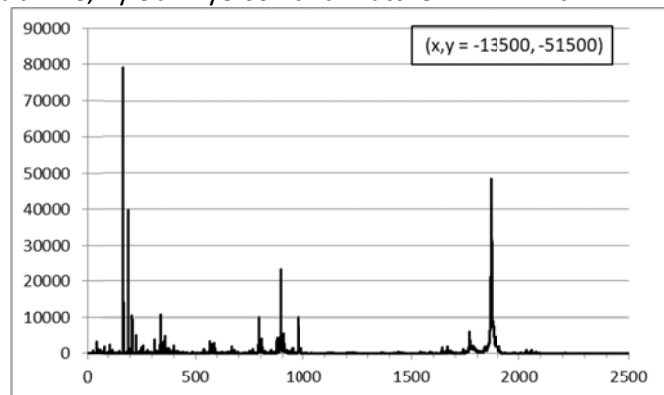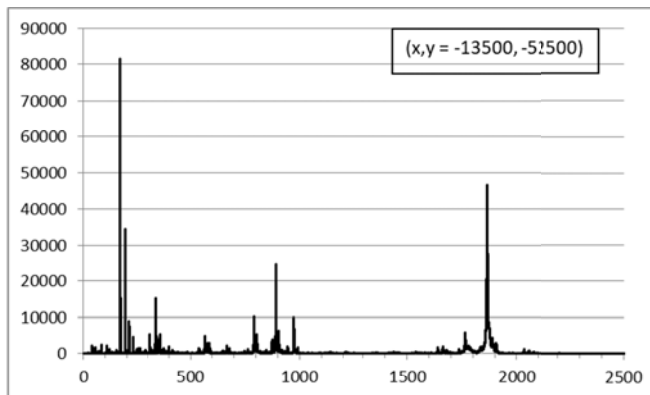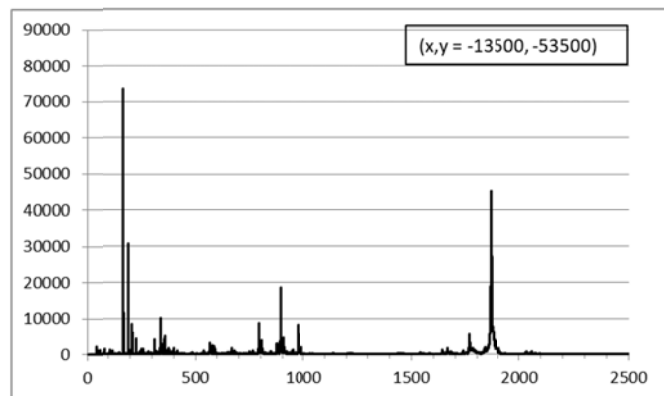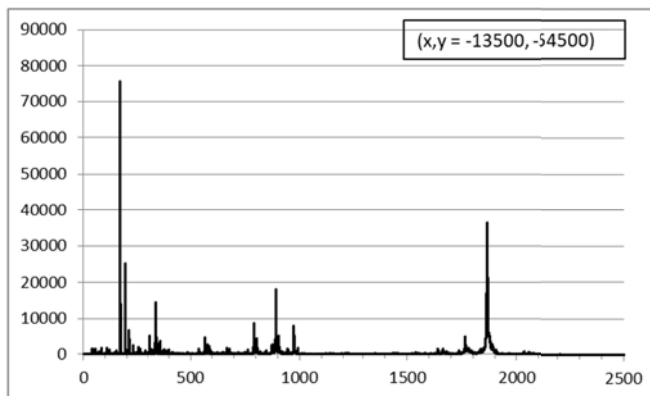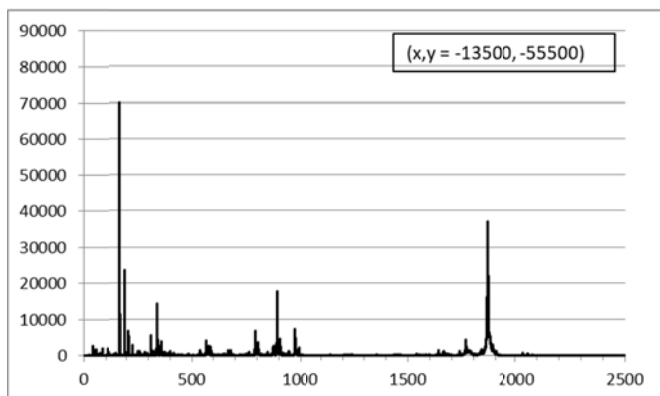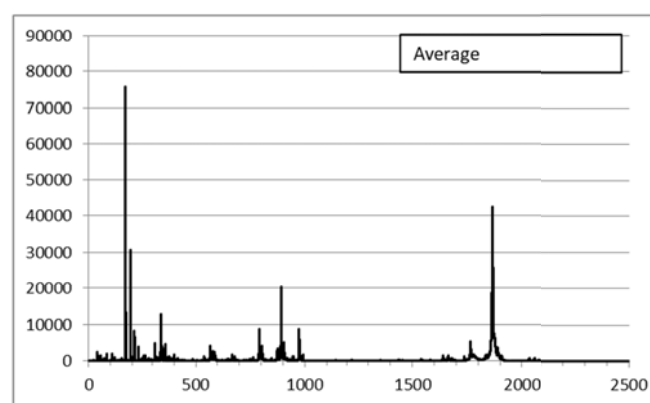

Supporting Information - Zipping and Unzipping Monolayers: Switchable Monolayer Oligomerization and Adhesion via Thiol - Disulfide Interconversion.

Jian He, Kyle J. Myerson and Matthew B. Zimmt

TOF-MS molecular ion region (this page) and 0-2.5 kD region (next page) from positions 2, 4, 6, 8 of the 2<sup>nd</sup> column from the left (and their average) **1 ML**

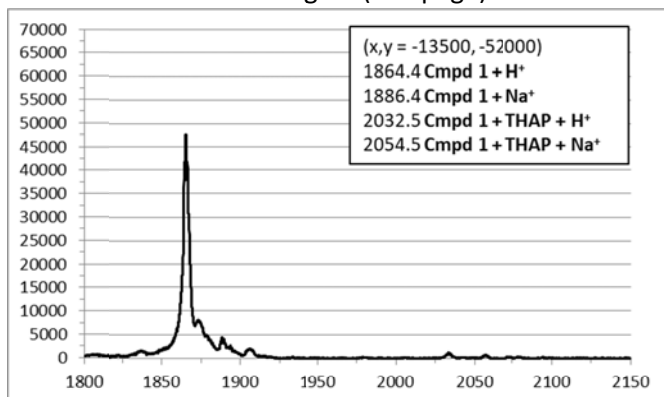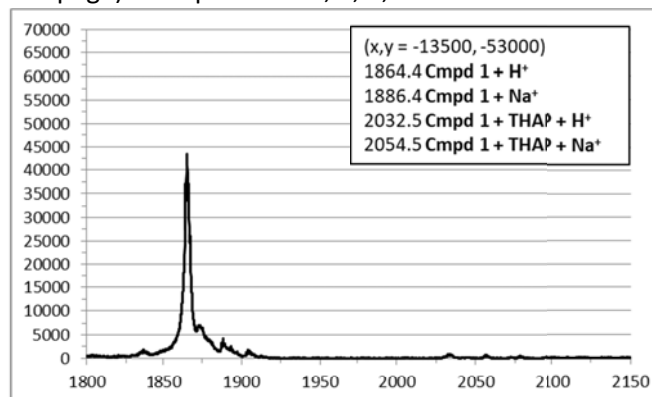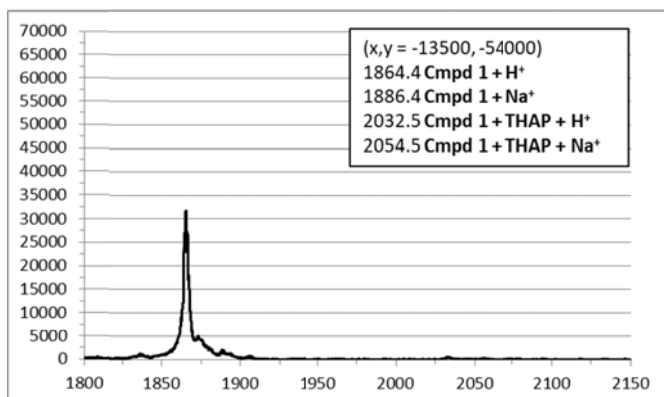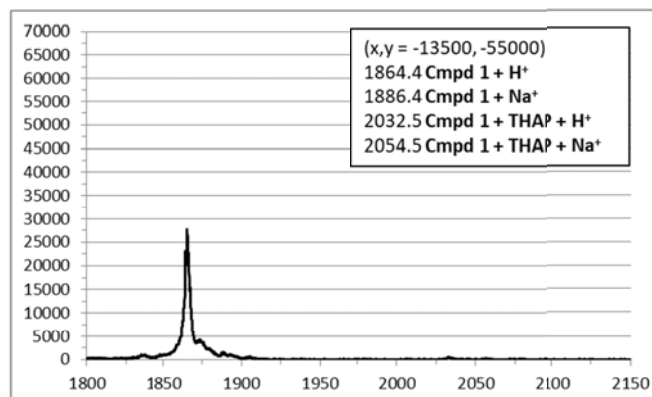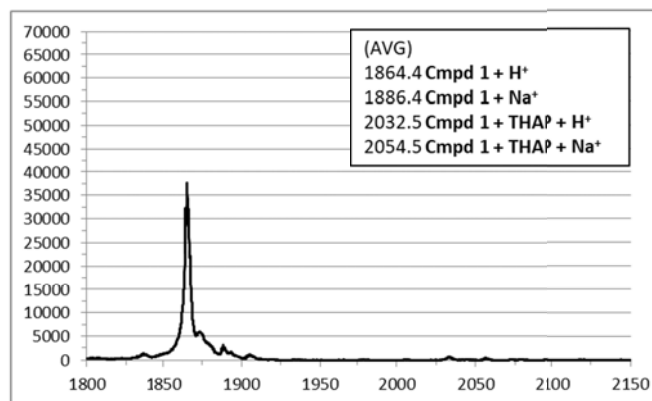



Supporting Information - Zipping and Unzipping Monolayers: Switchable Monolayer Oligomerization and Adhesion via Thiol - Disulfide Interconversion.

Jian He, Kyle J. Myerson and Matthew B. Zimmt

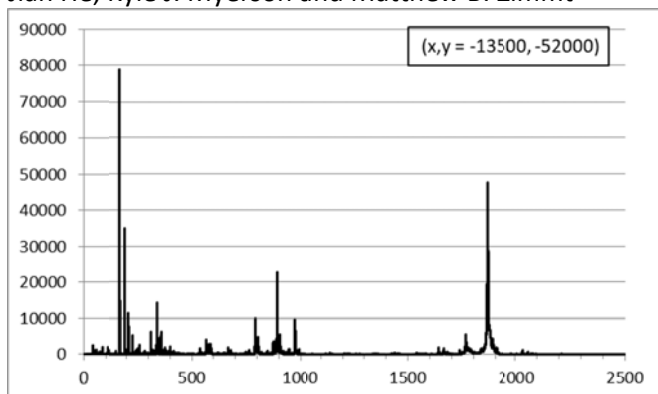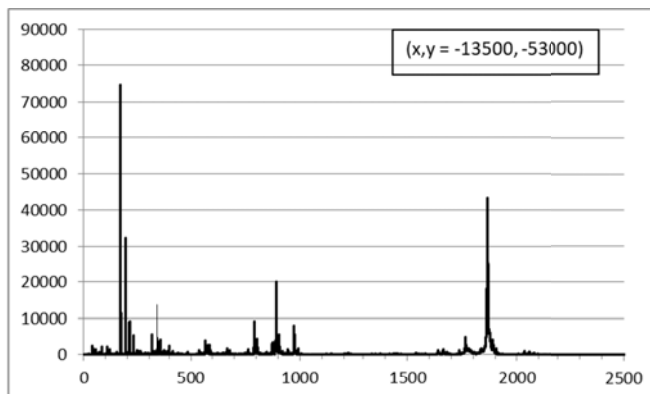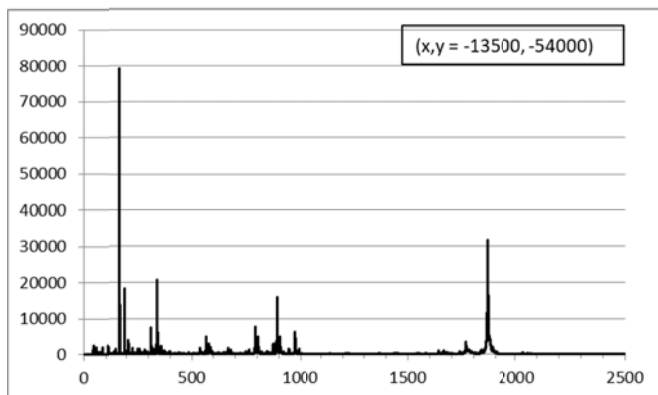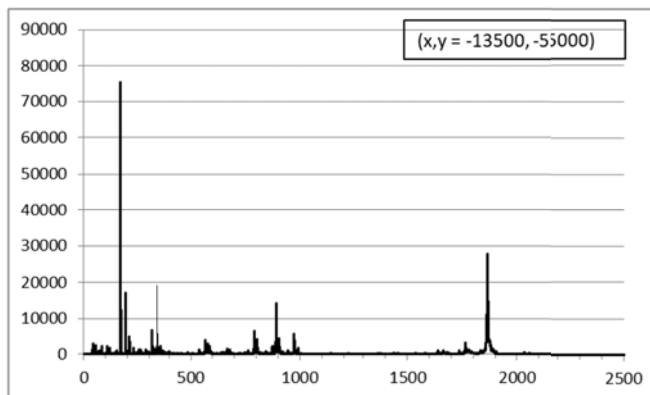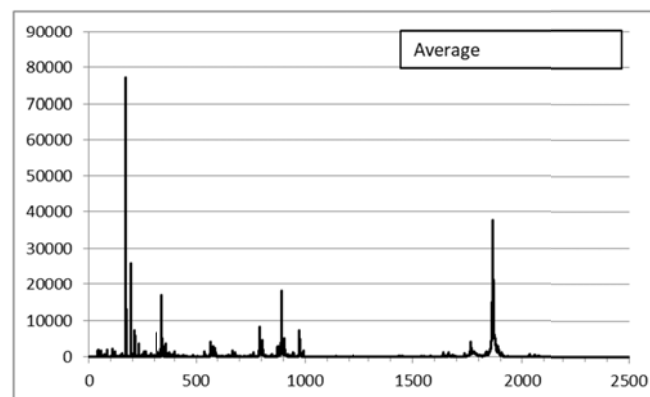

Supporting Information - Zipping and Unzipping Monolayers: Switchable Monolayer Oligomerization and Adhesion via Thiol - Disulfide Interconversion.

Jian He, Kyle J. Myerson and Matthew B. Zimmt

TOF-MS molecular ion region (this page) and 0-2.5 kD region (next page) from positions 1, 3, 5, 7, 9 of the 2<sup>nd</sup> column from the right (and their average) **1 ML**

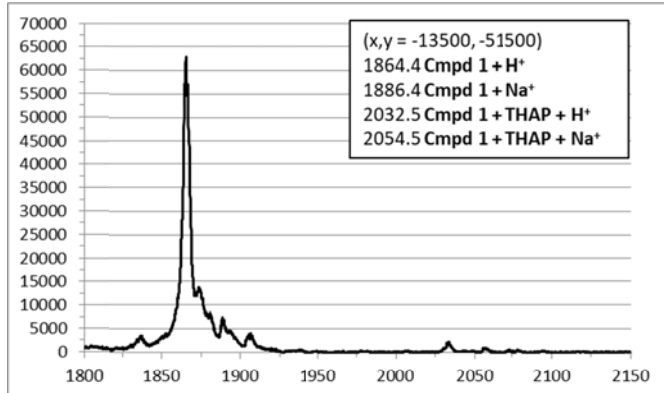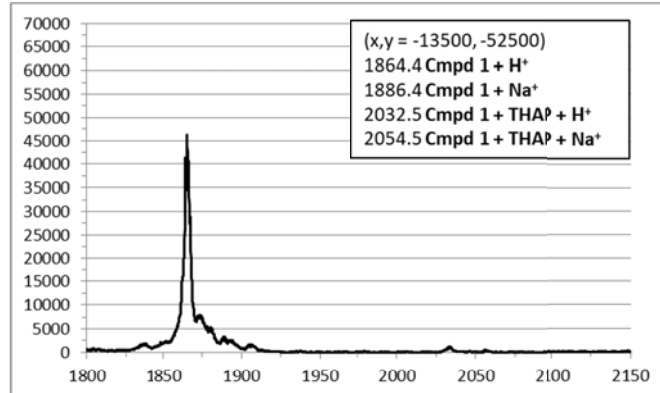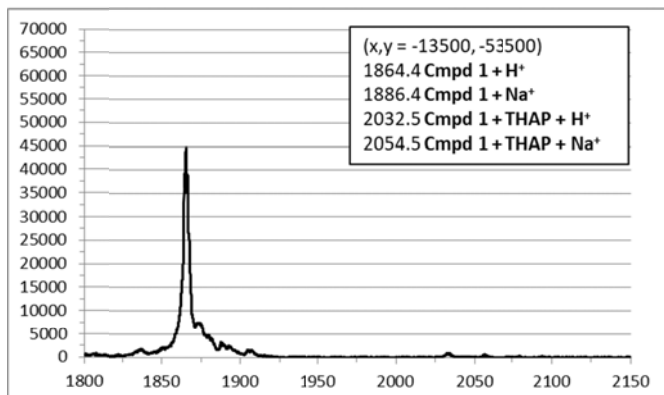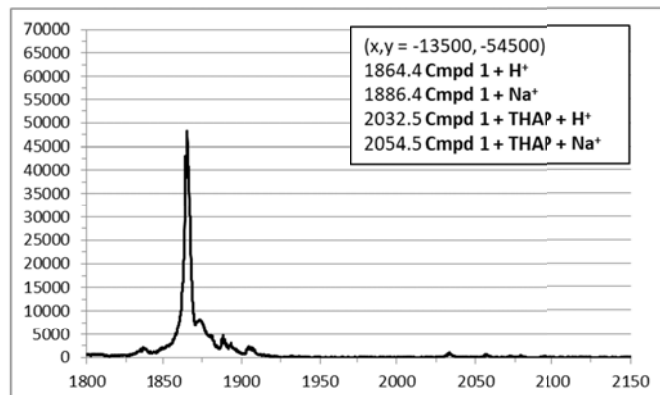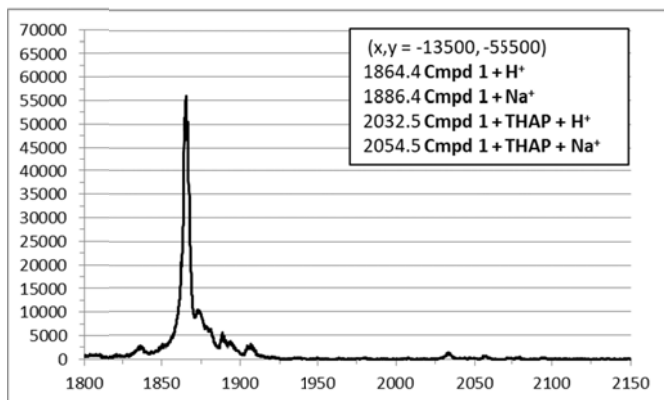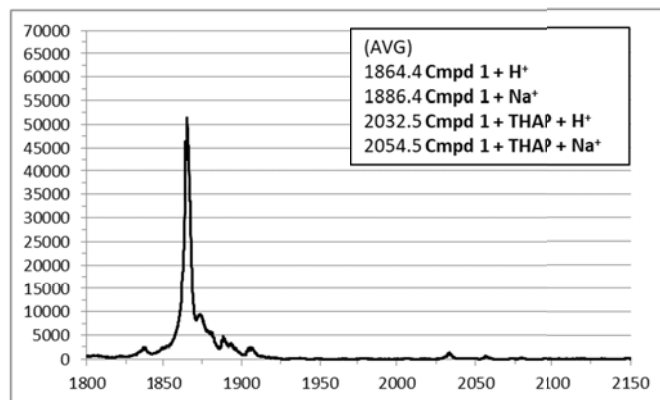

Supporting Information - Zipping and Unzipping Monolayers: Switchable Monolayer Oligomerization and Adhesion via Thiol - Disulfide Interconversion.  
Jian He, Kyle J. Myerson and Matthew B. Zimmt

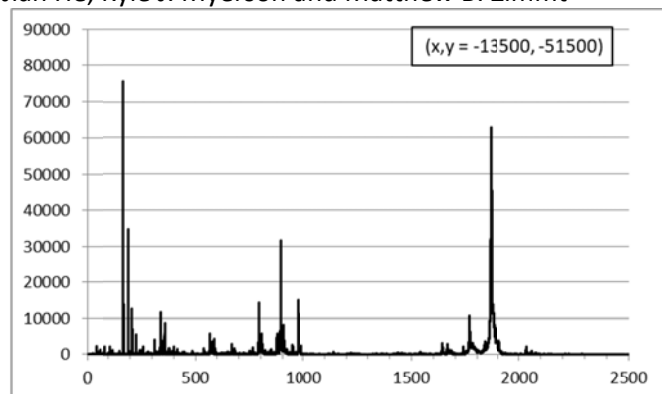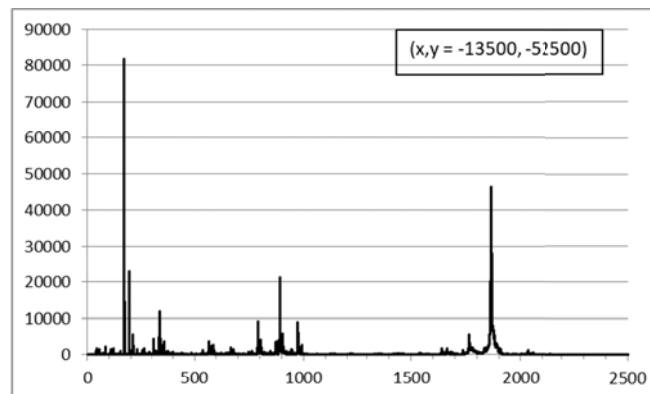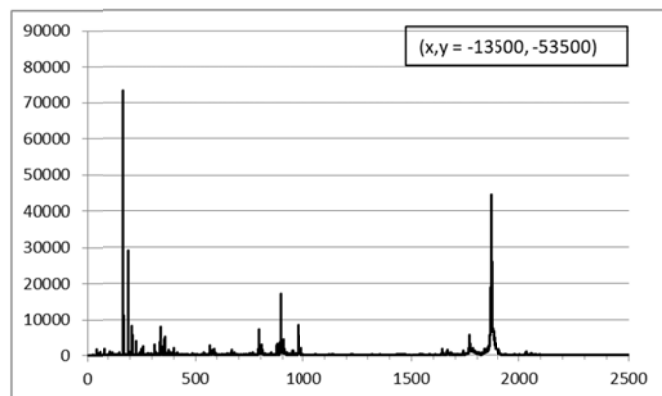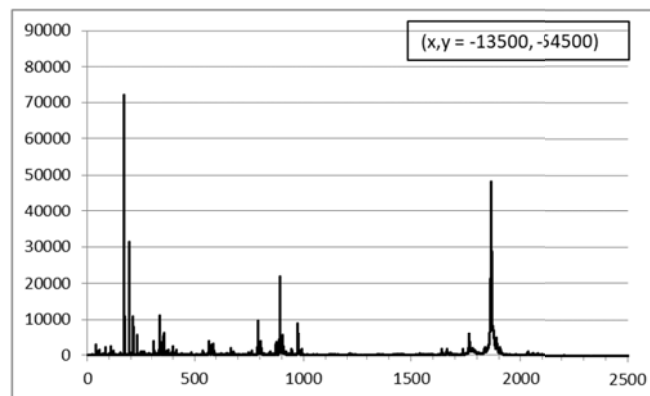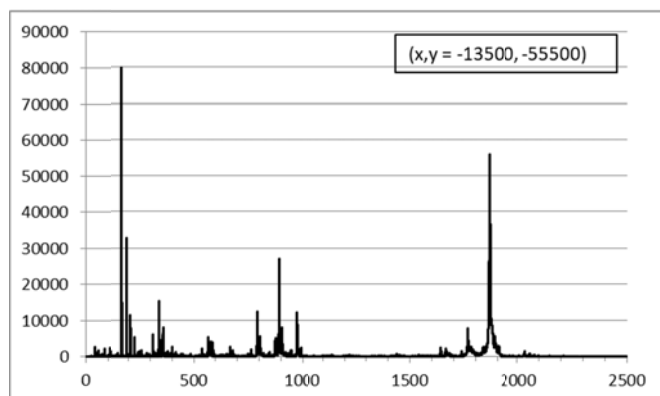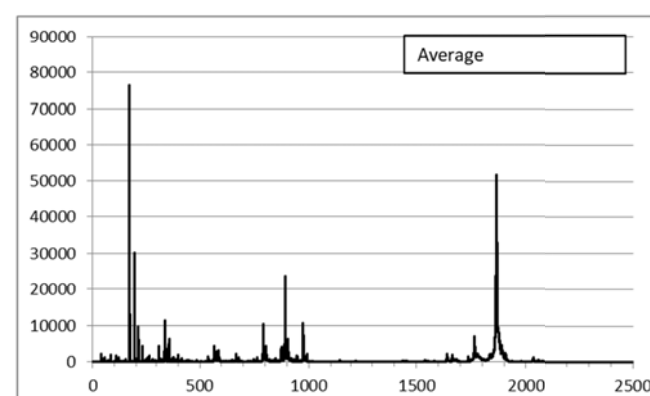

Supporting Information - Zipping and Unzipping Monolayers: Switchable Monolayer Oligomerization and Adhesion via Thiol - Disulfide Interconversion.

Jian He, Kyle J. Myerson and Matthew B. Zimmt

TOF-MS molecular ion region (this page) and 0-2.5 kD region (next page) from positions 2, 4, 6, 8 of the 2<sup>nd</sup> column from the right (and their average) **1 ML**

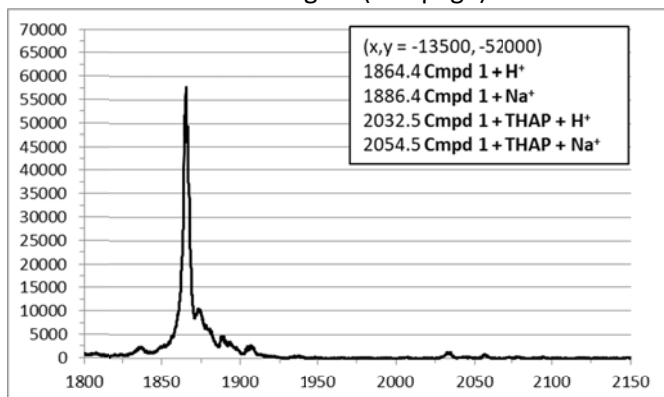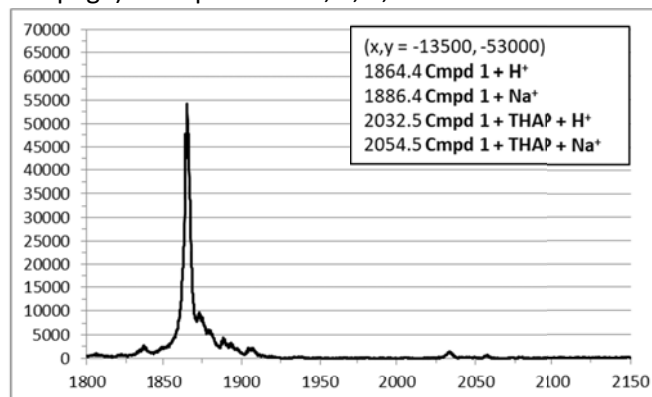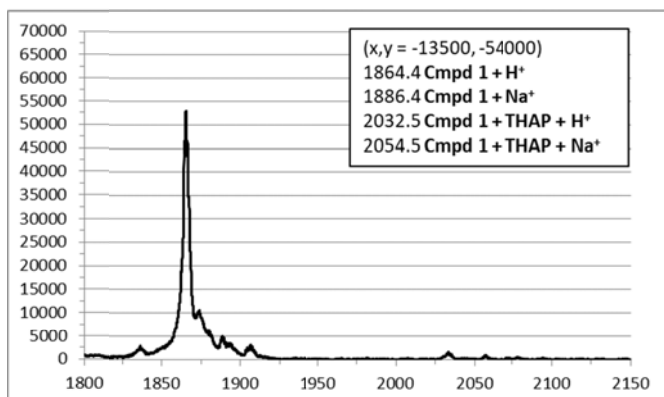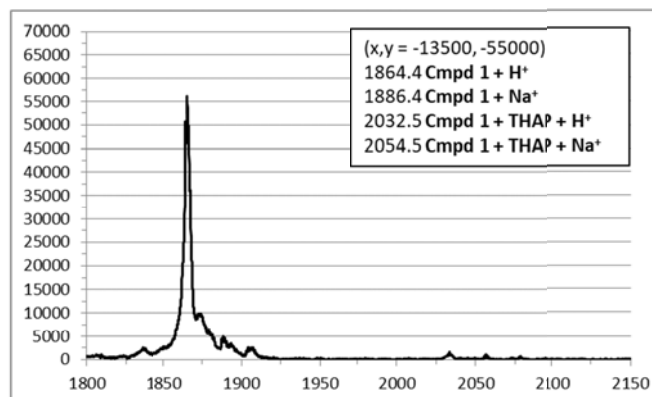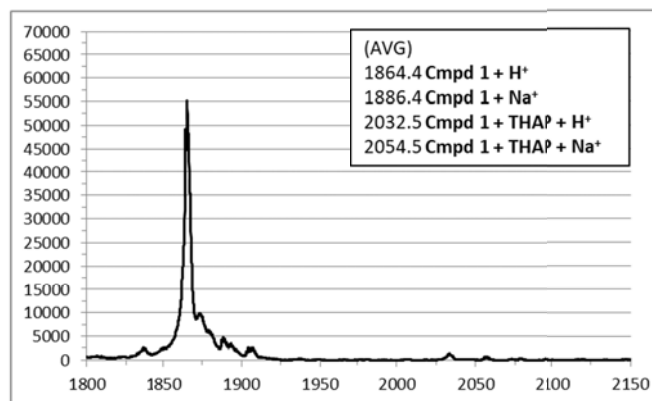

Supporting Information - Zipping and Unzipping Monolayers: Switchable Monolayer Oligomerization and Adhesion via Thiol - Disulfide Interconversion.

Jian He, Kyle J. Myerson and Matthew B. Zimmt

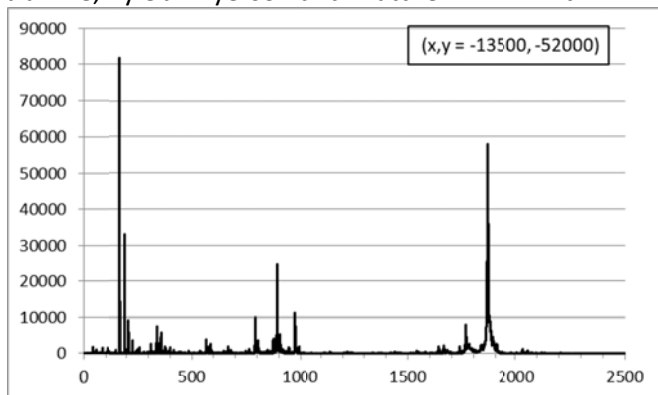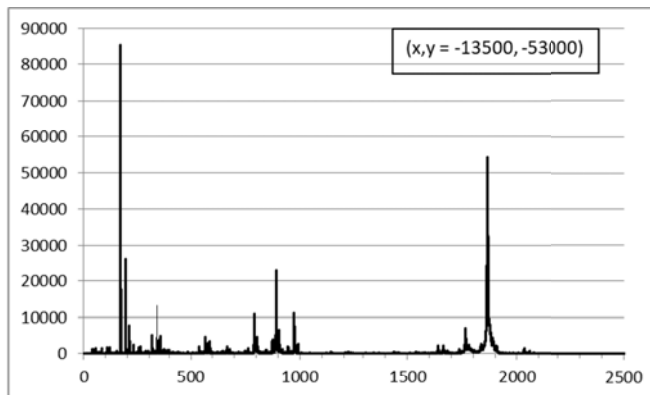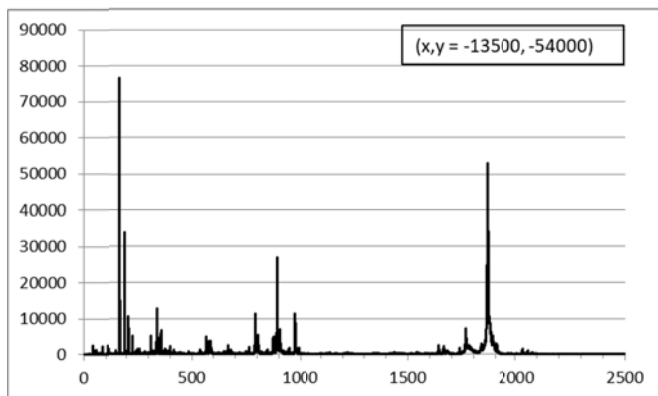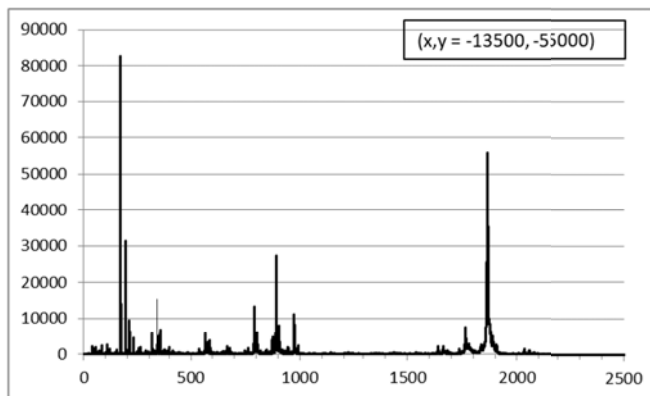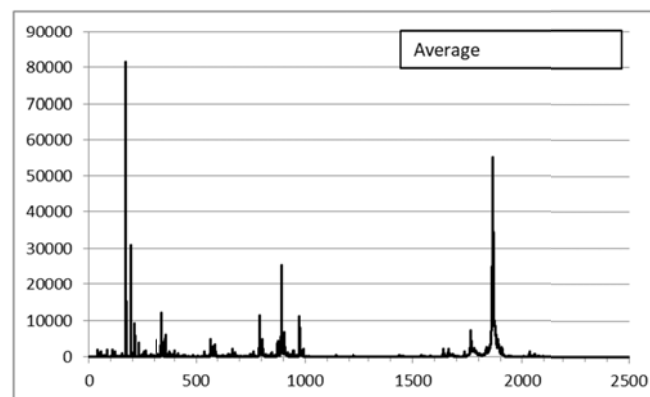

Supporting Information - Zipping and Unzipping Monolayers: Switchable Monolayer Oligomerization and Adhesion via Thiol - Disulfide Interconversion.

Jian He, Kyle J. Myerson and Matthew B. Zimmt

TOF-MS molecular ion region (this page) and 0-2.5 kD region (next page) from positions 1, 3, 5, 7, 9 of the right most column (and their average) **1 ML**

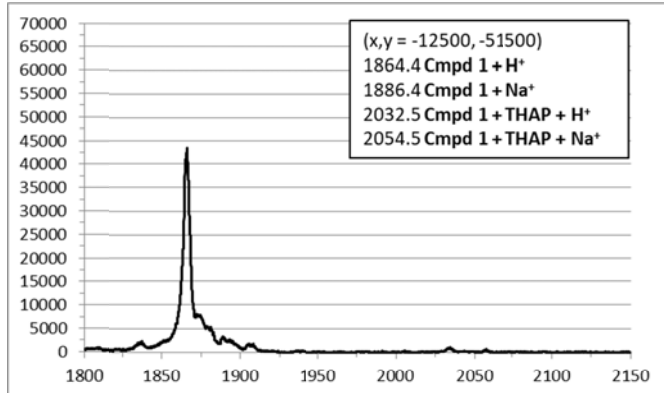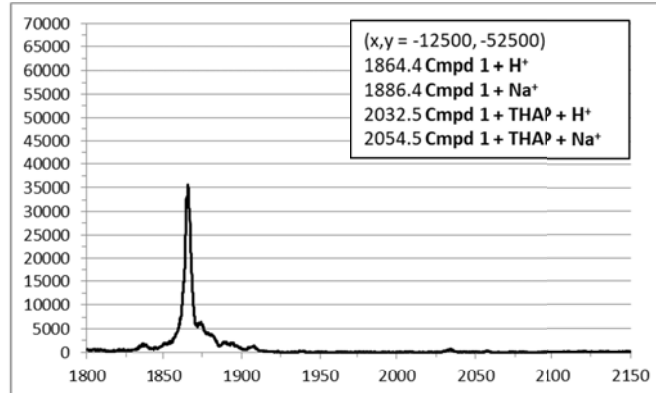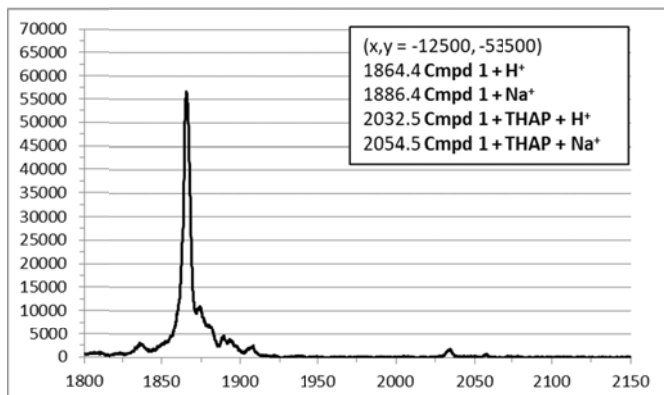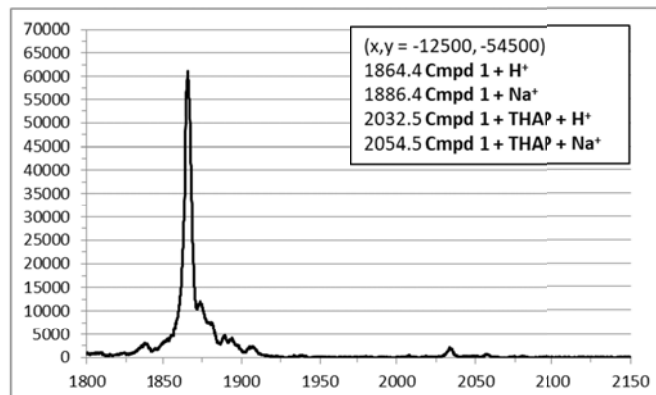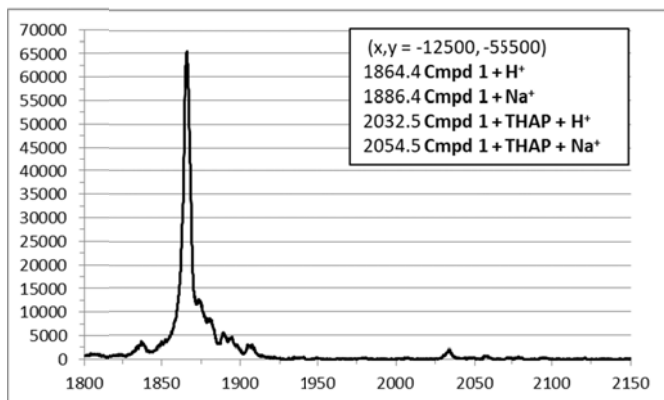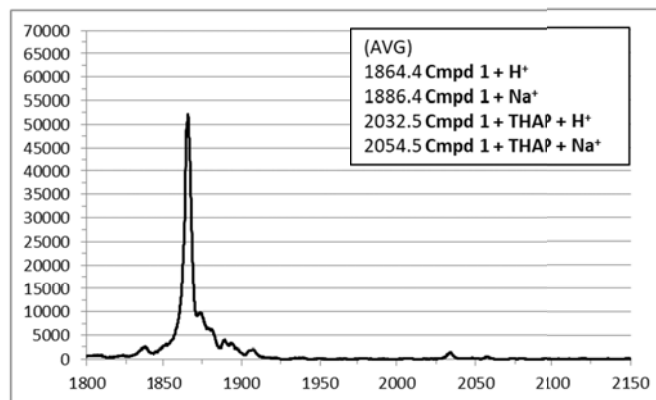

Supporting Information - Zipping and Unzipping Monolayers: Switchable Monolayer Oligomerization and Adhesion via Thiol - Disulfide Interconversion.  
Jian He, Kyle J. Myerson and Matthew B. Zimmt

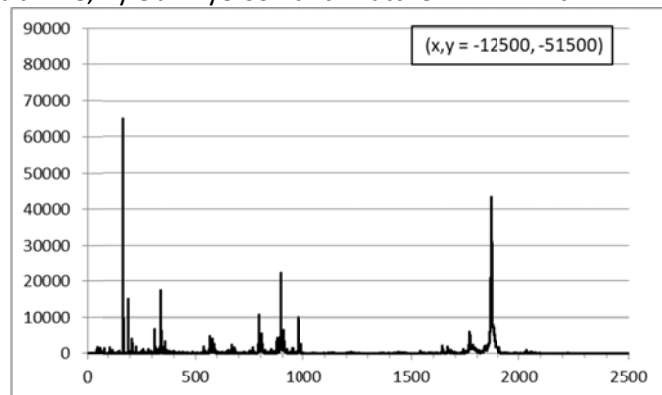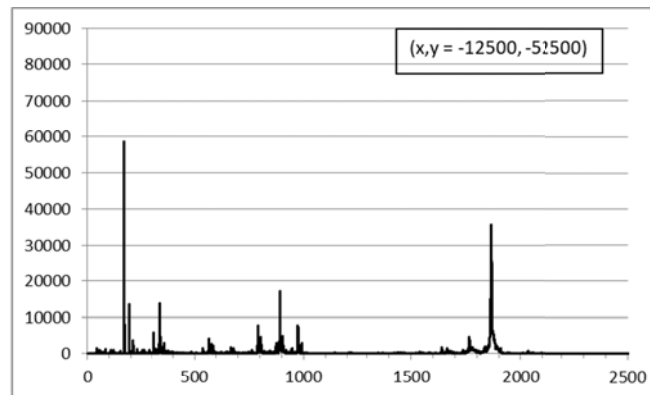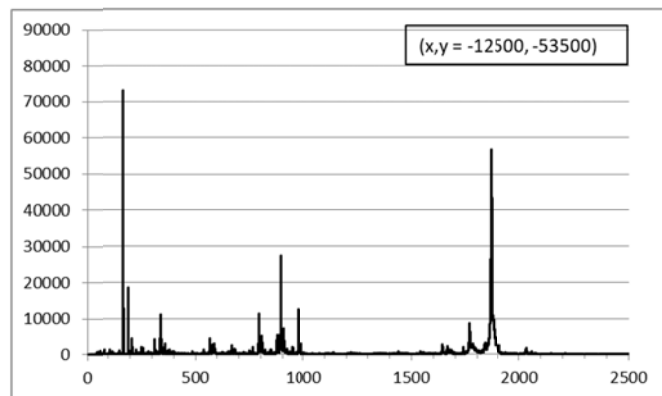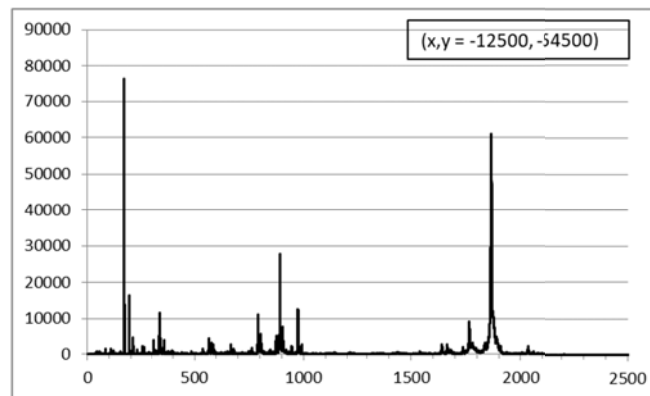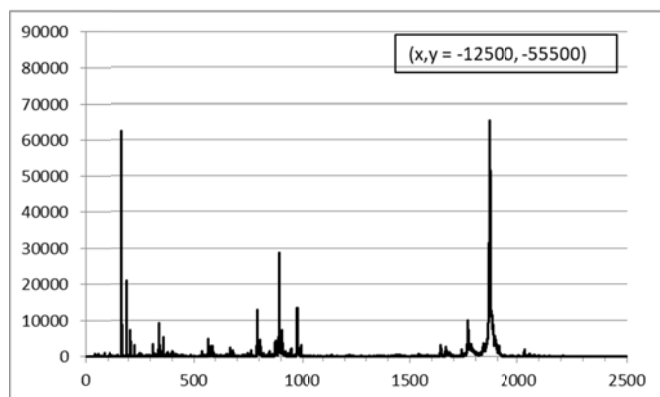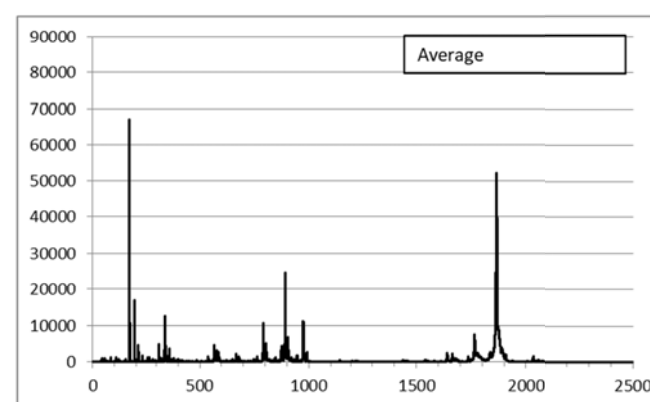

Supporting Information - Zipping and Unzipping Monolayers: Switchable Monolayer Oligomerization and Adhesion via Thiol - Disulfide Interconversion.

Jian He, Kyle J. Myerson and Matthew B. Zimmt

TOF-MS molecular ion region (this page) and 0-2.5 kD region (next page) from positions 2, 4, 6, 8 of the right most column (and their average) **1 ML**

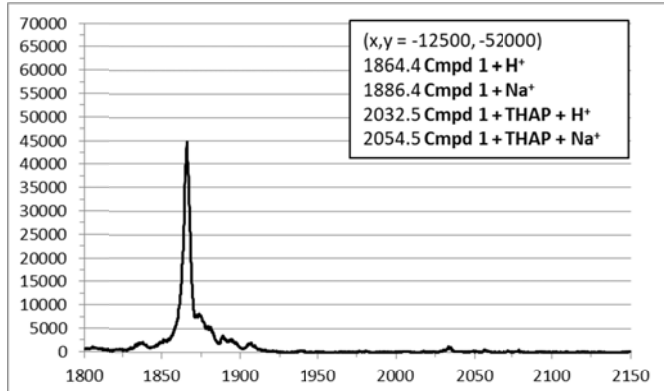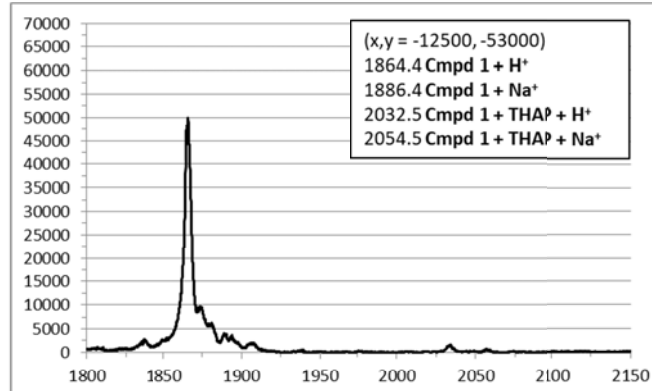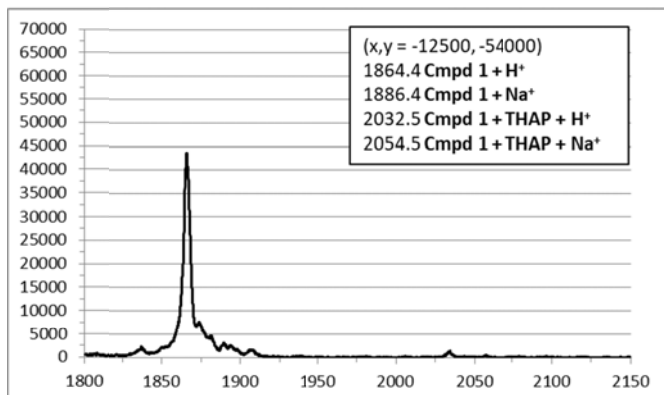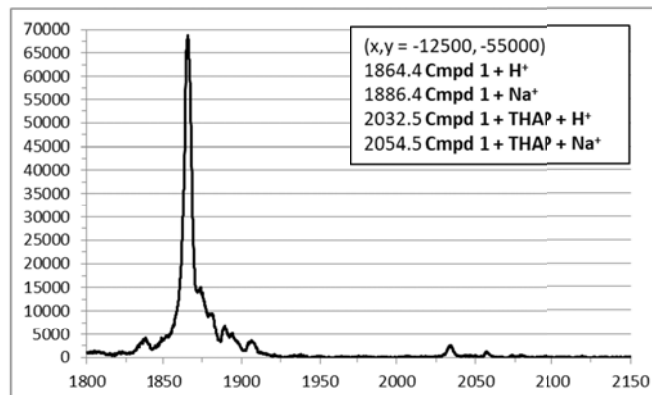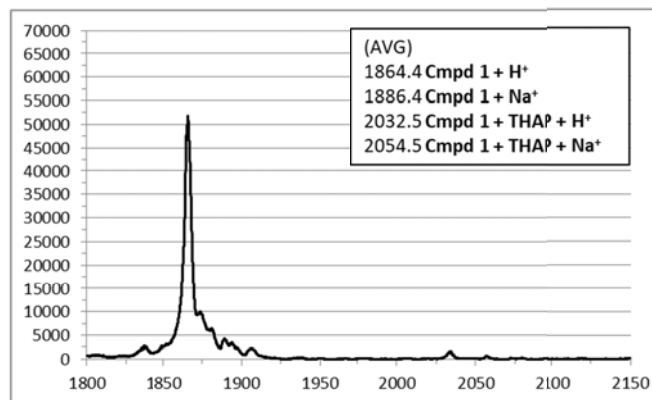



Supporting Information - Zipping and Unzipping Monolayers: Switchable Monolayer Oligomerization and Adhesion via Thiol - Disulfide Interconversion.

Jian He, Kyle J. Myerson and Matthew B. Zimmt

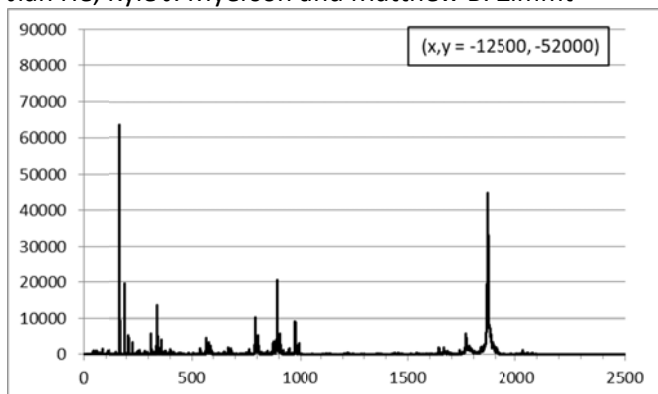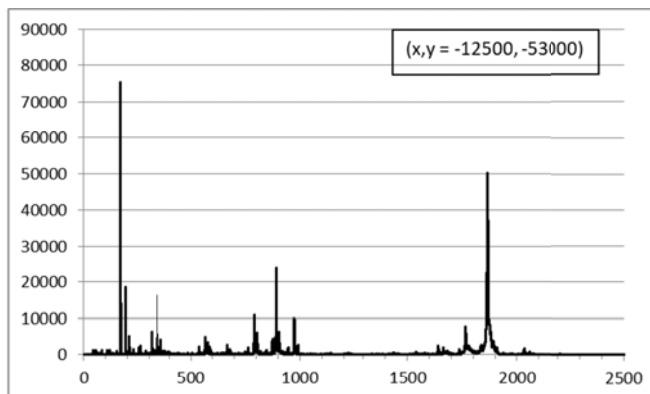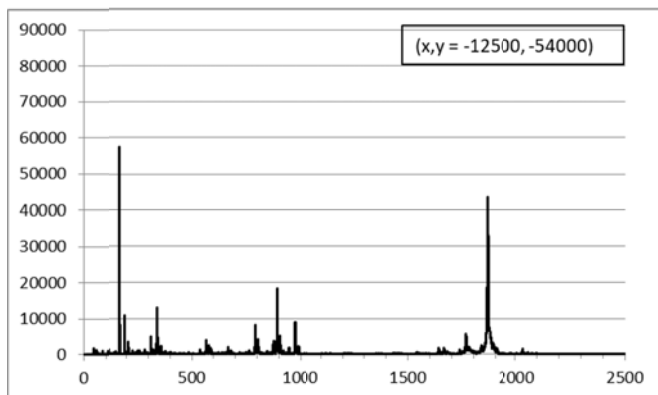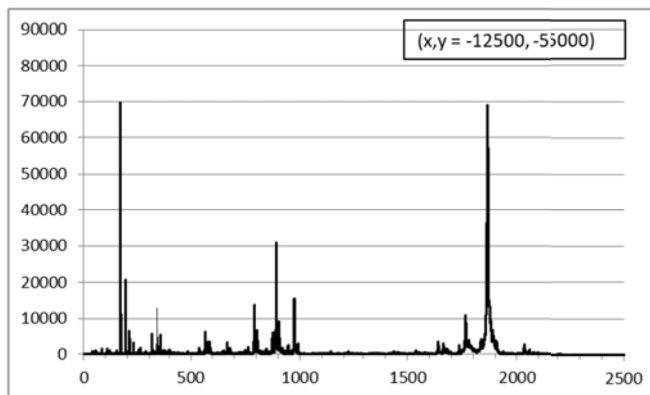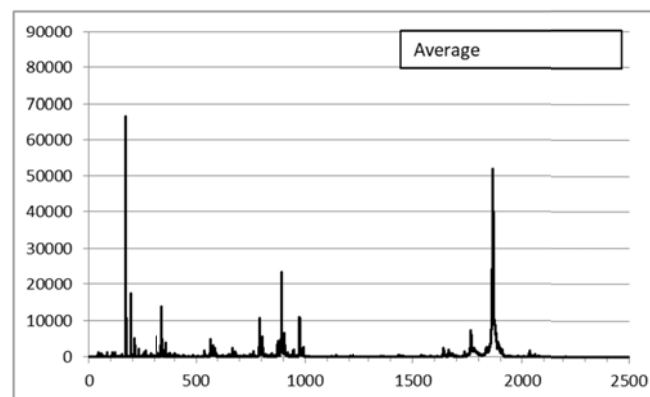

d) Photograph of THAP coated **1** / HOPG substrate after 36 TOF-MS measurements in c).

A thin film of THAP was applied to the monolayer **1** / HOPG substrate using 10  $\mu\text{L}$  of 5 mg/mL THAP in 30/70 acetone/hexane and allowed to air dry. Regions irradiated to collect mass spectra appear as dark spots ( $\sim 50\mu\text{m}$  diameter). The horizontal spacing between spots in the left (right) two columns is 1000  $\mu\text{m}$ . The vertical spacing between spots in a column is 500  $\mu\text{m}$ .

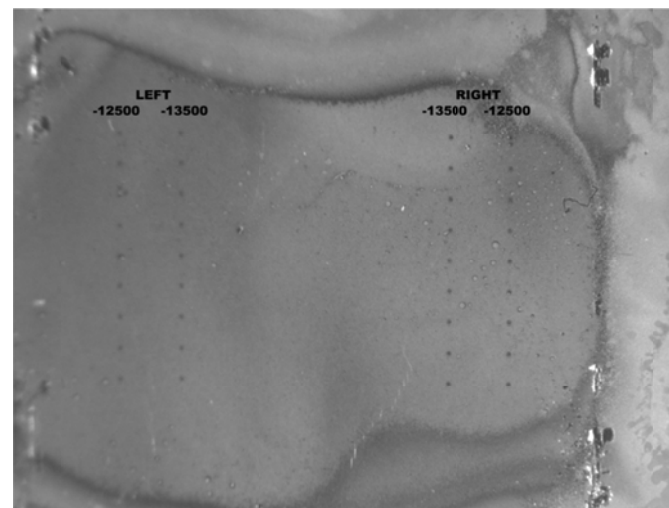

e) TOF MS m/z peaks with proposed structural assignments: monolayer of **1** on HOPG with applied THAP (underlined m/z intensities  $> 0.05 \times \text{Int}(\text{THAP})$ )

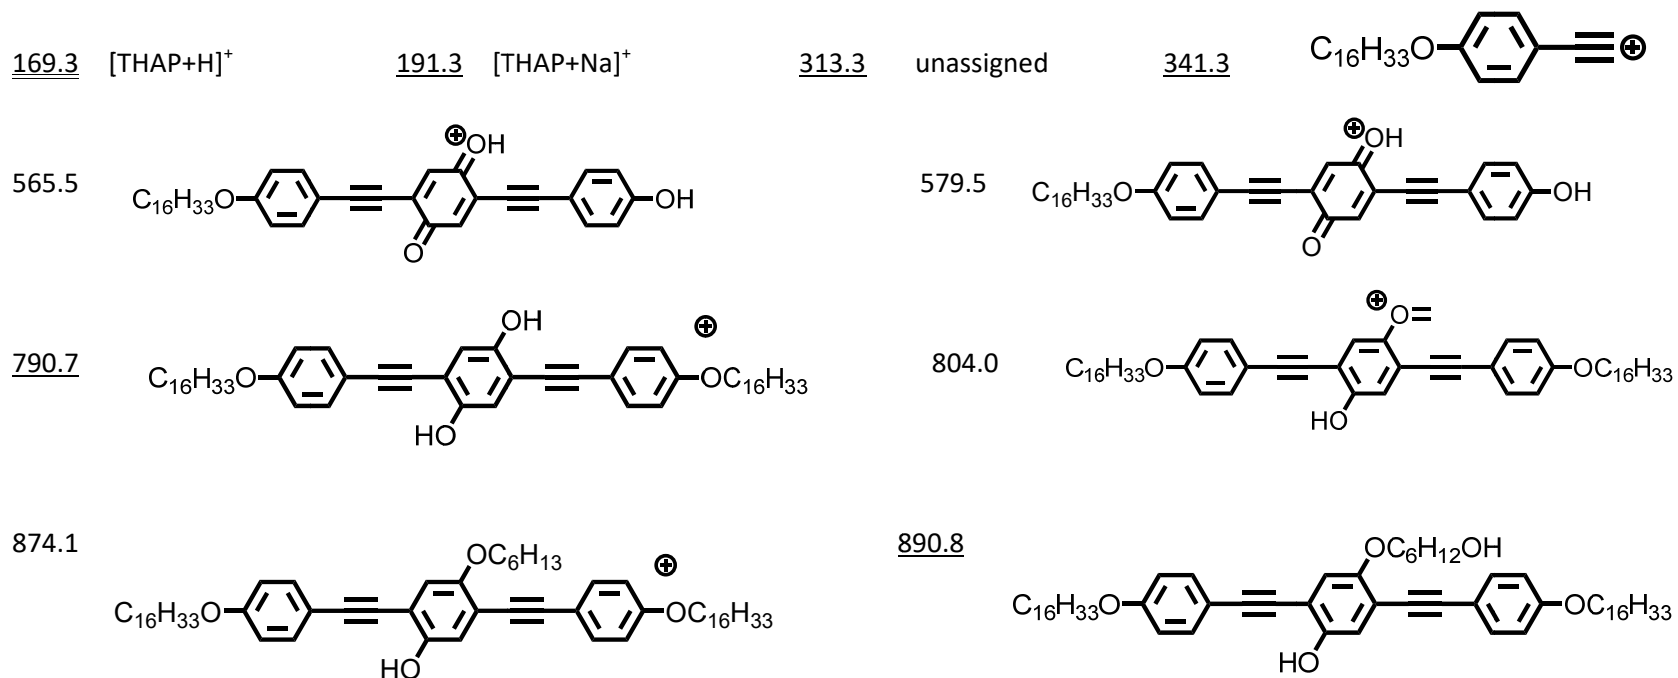

Supporting Information - Zipping and Unzipping Monolayers: Switchable Monolayer Oligomerization and Adhesion via Thiol - Disulfide Interconversion.  
 Jian He, Kyle J. Myerson and Matthew B. Zimmt

973.4

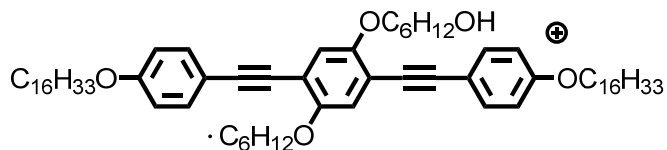

1639.4

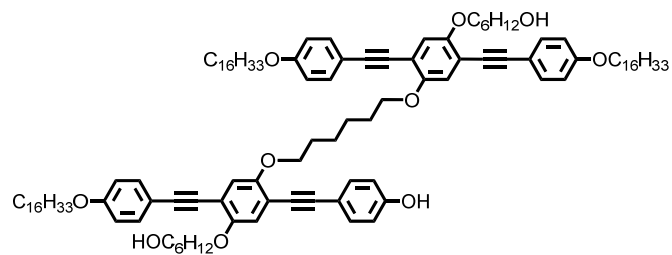

1663.9

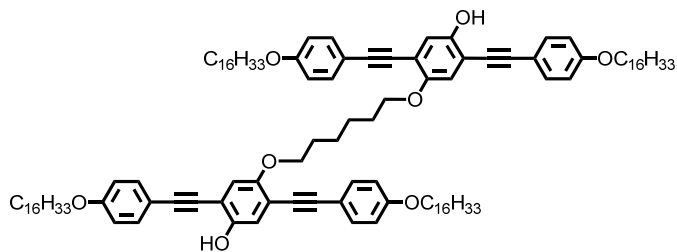

1764.5

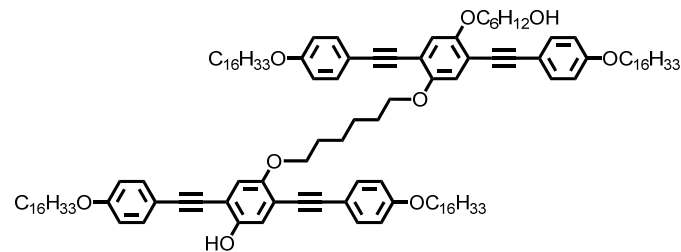

1835.1 unassigned

1864.4 [1 + H]<sup>+</sup>

1886 [1 + Na]<sup>+</sup>

2032.8 [1 + THAP + H]<sup>+</sup>

Jian He, Kyle J. Myerson and Matthew B. Zimmt

**vi) Fig. S3.** TOF mass spectra following in-situ reaction of monolayer **1** to form monolayer **2a**. Three spectral regions are presented for each spot sampled: the 0-2.5kD region, the 0-0.5kD region (Intensity (y) axis scales 0-90000) and the 1.8-2.6 kD region (Intensity (y) axis scale 0-5000).

Procedure: monolayer of **1** immersed in DCM containing 40mM  $\beta$ -tritylthiopropionic acid, 40 mM EDC and 40 mM DMAP for 0.5 hr. Monolayer was rinsed with 0.1 mL EtOH to remove reagents. After draining the EtOH and air drying, 10  $\mu$ L of 5 mg / mL THAP in 30% acetone / hexane was applied to form a thin THAP film.

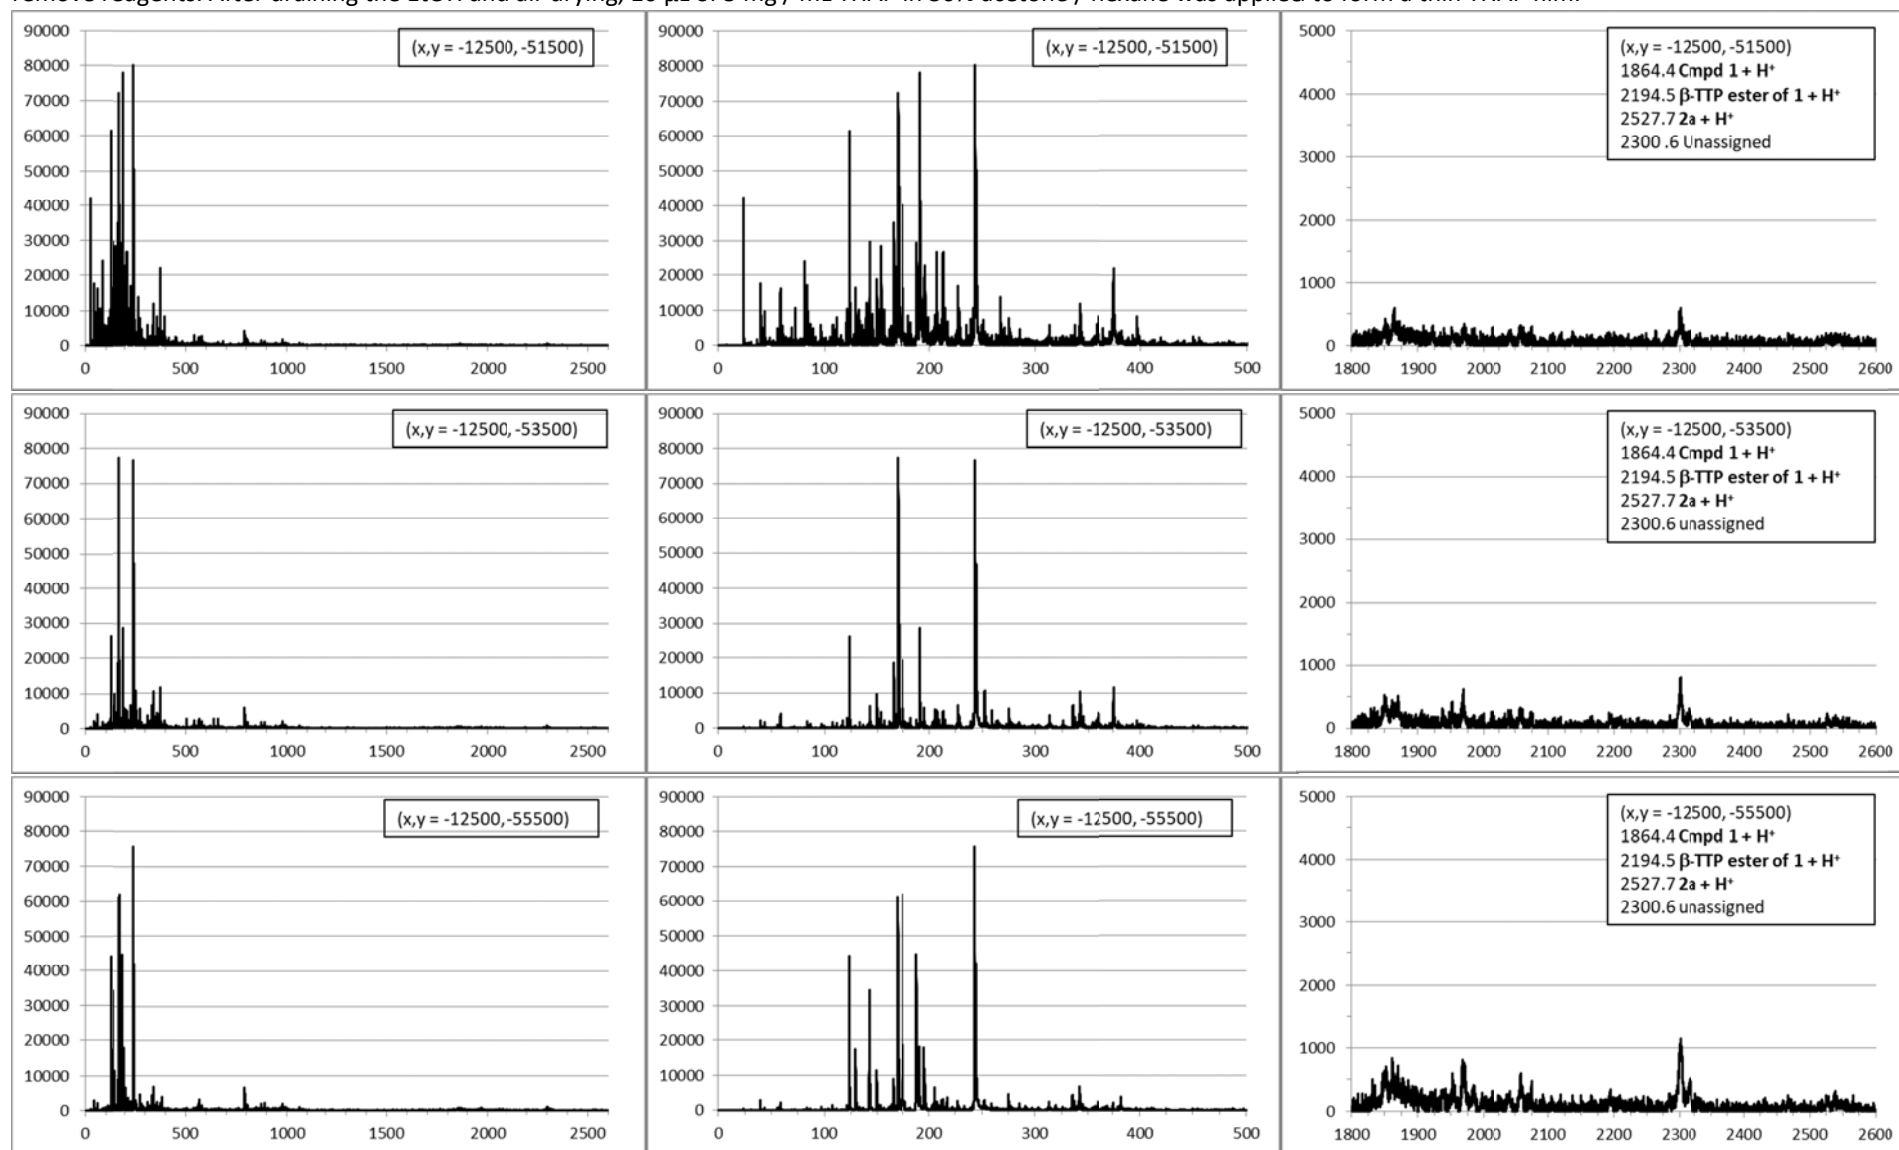

**vii) Fig. S4.** TOF mass spectra following incubation of monolayer **1** with DCM containing 40mM  $\beta$ -TTP but lacking EDC and DMAP. Three spectral regions are presented for each spot sampled: the 0-2.5kD region, the 0-0.5kD region and 1.8-2.5 kD region.

Procedure: monolayer of **1** immersed in DCM containing 40mM  $\beta$ -tritylthiopropionic acid for 0.5 hr. Monolayer was rinsed with 0.1 mL EtOH to remove reagents. After draining the EtOH and air drying, 10  $\mu$ L of 5 mg / mL THAP in 30% acetone / hexane was applied to form a thin THAP film.

a) Summary and statistical analysis of mass spectra peak intensities from incubating a monolayer of **1** with  $\beta$ -TTP solution lacking EDC and DMAP.

| <u>samples</u> | <u>m/z</u> | <u>assignment</u>               | <u>Int. minimum</u> | <u>Int. maximum</u> | <u>Intensity average</u> | <u>Intensity st.dev.</u> | <u>st.dev. / &lt; Int. &gt;</u> |
|----------------|------------|---------------------------------|---------------------|---------------------|--------------------------|--------------------------|---------------------------------|
| 18             | 169.3      | matrix ([THAP+H] <sup>+</sup> ) | 44800               | 86600               | 68000                    | 12000                    | 0.18                            |
| 18             | 243.1      | Trityl cation                   | 520                 | 10000               | 3800                     | 2300                     | 0.61                            |
| 18             | 1864.4     | [ <b>1</b> + H] <sup>+</sup>    | 28000               | 57700               | 38900                    | 10200                    | 0.26                            |

b) TOF mass spectra 0-2.5 kD region (**1** +  $\beta$ -TTP only): 18 samples (Intensity (y) axis scale 0-90000)

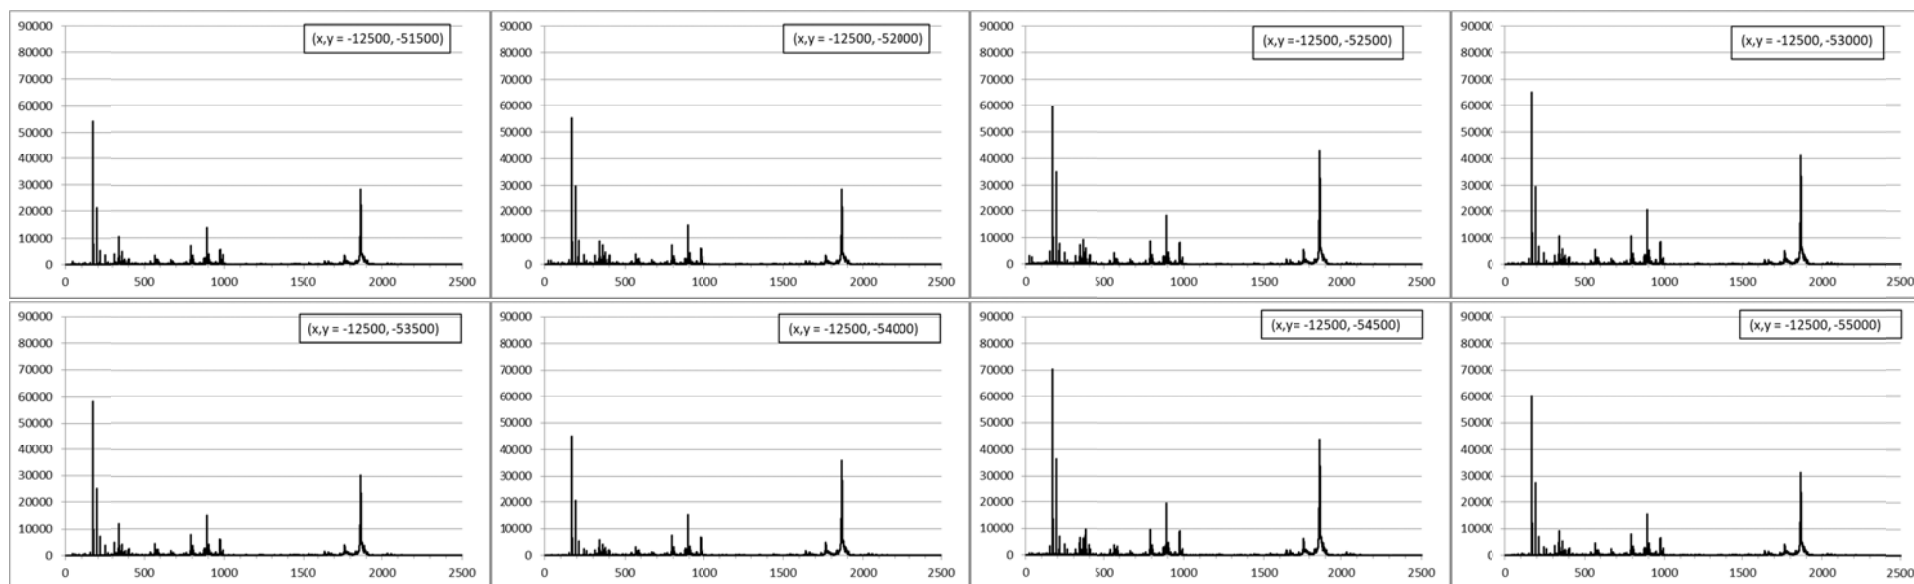

# Supporting Information - Zipping and Unzipping Monolayers: Switchable Monolayer Oligomerization and Adhesion via Thiol - Disulfide Interconversion.

Jian He, Kyle J. Myerson and Matthew B. Zimmt

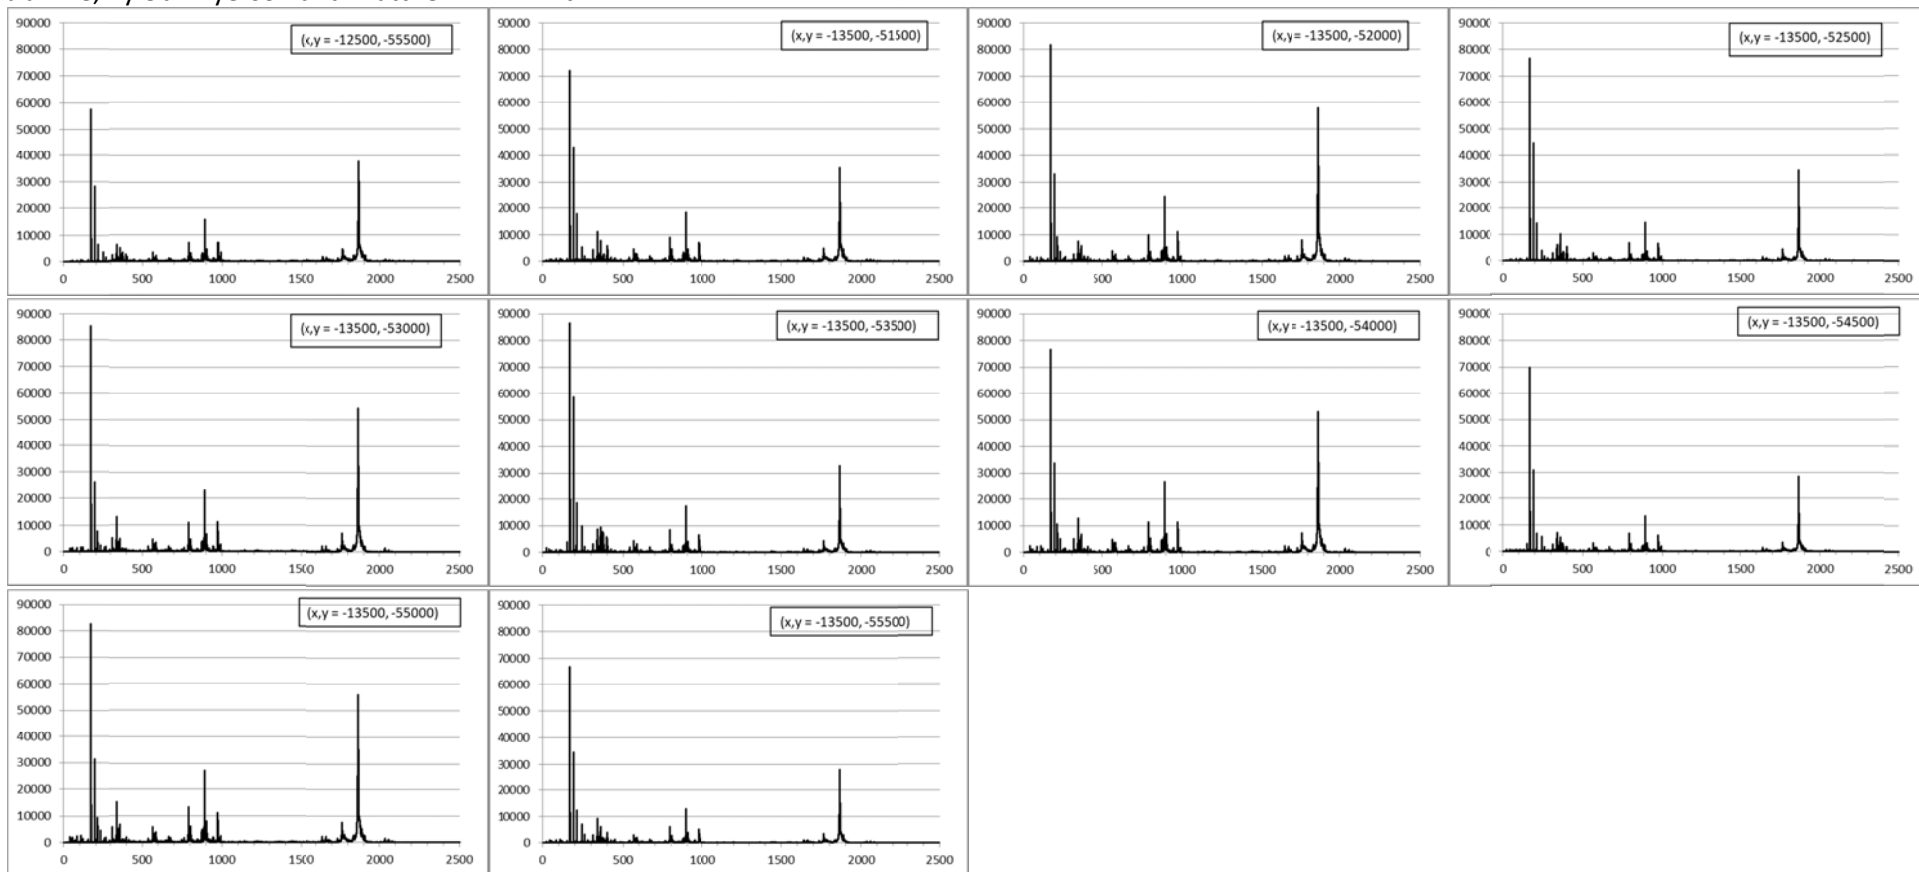

c) TOF mass spectra 0-0.5 kD region ( $1 + \beta$ -TTP only): 18 samples (Intensity (y) axis scale 0-90000, arrow points to trityl cation peak at  $m/z = 243$ )

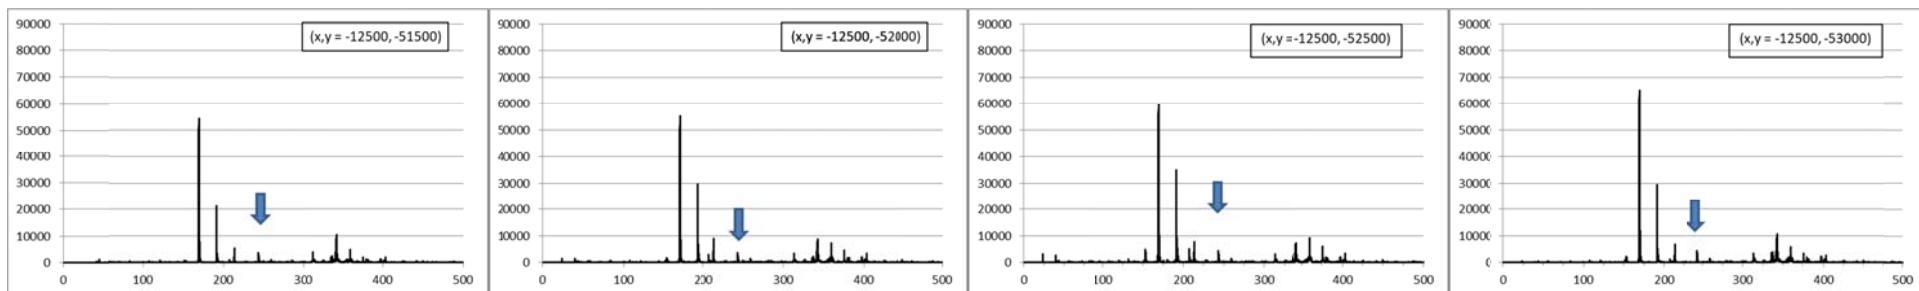

# Supporting Information - Zipping and Unzipping Monolayers: Switchable Monolayer Oligomerization and Adhesion via Thiol - Disulfide Interconversion.

Jian He, Kyle J. Myerson and Matthew B. Zimmt

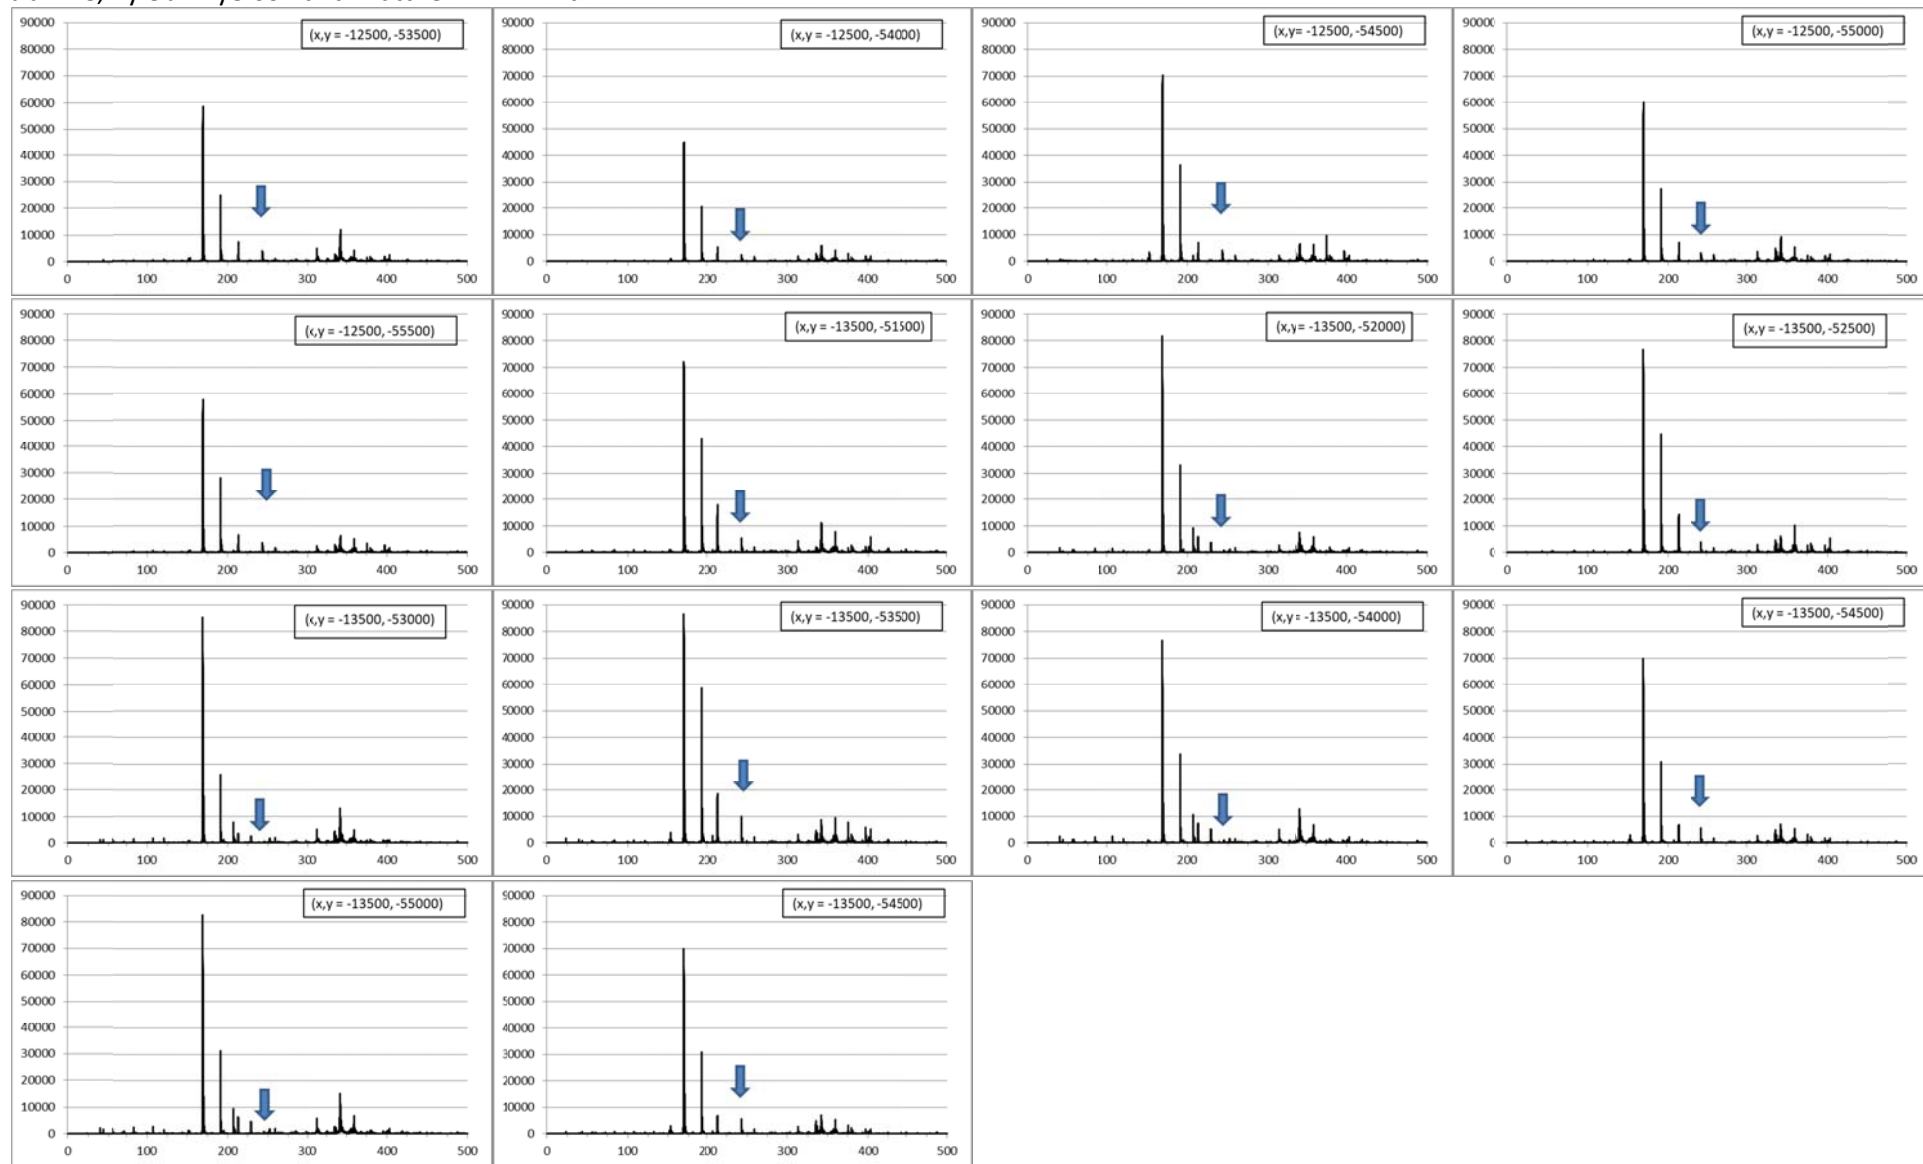

Supporting Information - Zipping and Unzipping Monolayers: Switchable Monolayer Oligomerization and Adhesion via Thiol - Disulfide Interconversion.  
Jian He, Kyle J. Myerson and Matthew B. Zimmt

d) TOF mass spectra 1.8-2.5 kD region (1 +  $\beta$ -TTP only): 18 samples (Intensity (y) axis scale 0-60000)

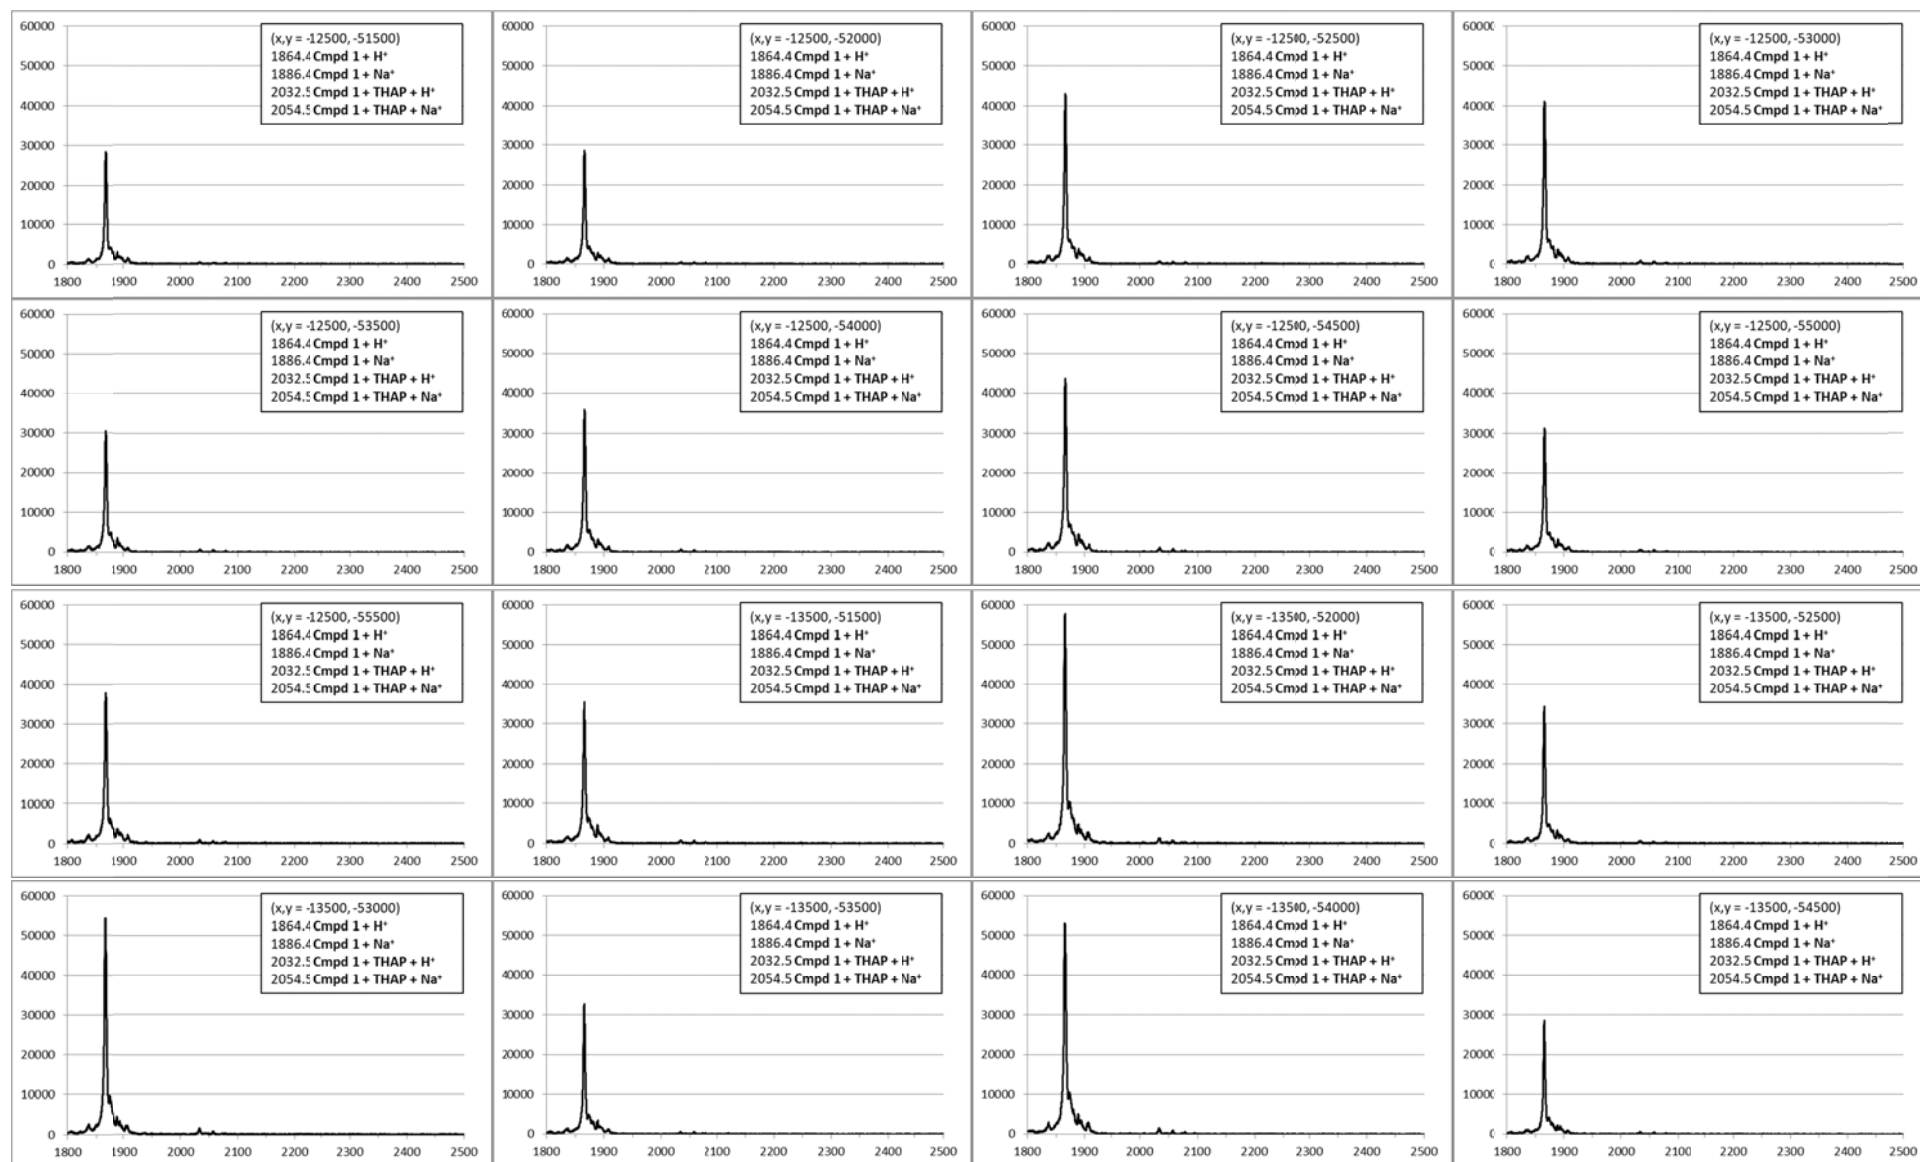



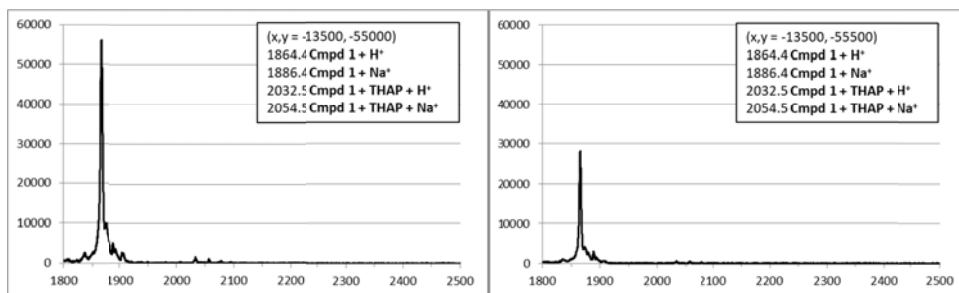

viii) **Fig. S5.** TOF mass spectra following in-situ reaction of monolayer **1** to form monolayer **2b**

TOF mass spectra after immersing a monolayer of **1** on HOPG in a DCM solution with 40 mM valeric acid, 40 mM EDC and 40 mM EDC for 30 minutes. Two spectral regions are presented for each spot sampled: the 0-2.5kD region and the 1.8-2.5 kD region.

Procedure: monolayer of **1** immersed in DCM containing 40 mM valeric acid, 40 mM EDC and 40 mM EDC for 0.5 hr. Monolayer was rinsed with 0.1 mL EtOH to remove reagents. After draining the EtOH and air drying, 10  $\mu$ L of 5 mg / mL THAP in 30% acetone / hexane was applied to form a thin THAP film.

a) Summary and statistical analysis of mass spectra peak intensities from incubating a monolayer of **1** with valenic acid / EDC / DMAP solution.

| <u>samples</u> | <u>m/ z</u> | <u>assignment</u>                            | <u>Int. minimum</u> | <u>Int. maximum</u> | <u>Intensity average</u> | <u>Intensity st.dev.</u> | <u>st.dev. / &lt; Int. &gt;</u> |
|----------------|-------------|----------------------------------------------|---------------------|---------------------|--------------------------|--------------------------|---------------------------------|
| 5              | 169.3       | matrix ([THAP+H] <sup>+</sup> )              | 58200               | 82600               | 70300                    | 8800                     | 0.13                            |
| 5              | 1864.4      | [ <b>1</b> + H ] <sup>+</sup>                | 780                 | 1600                | 1200                     | 370                      | 0.30                            |
| 5              | 1948.5      | [ <b>1</b> valerate ester + H ] <sup>+</sup> | 1630                | 5100                | 3300                     | 1400                     | 0.42                            |
| 5              | 2032.6      | [ <b>2b</b> + H ] <sup>+</sup>               | 6000                | 15400               | 11400                    | 3900                     | 0.35                            |

b) TOF mass spectra 0-2.5 kD region (**2b**): 5 samples (Intensity (y) axis scale 0-90000)

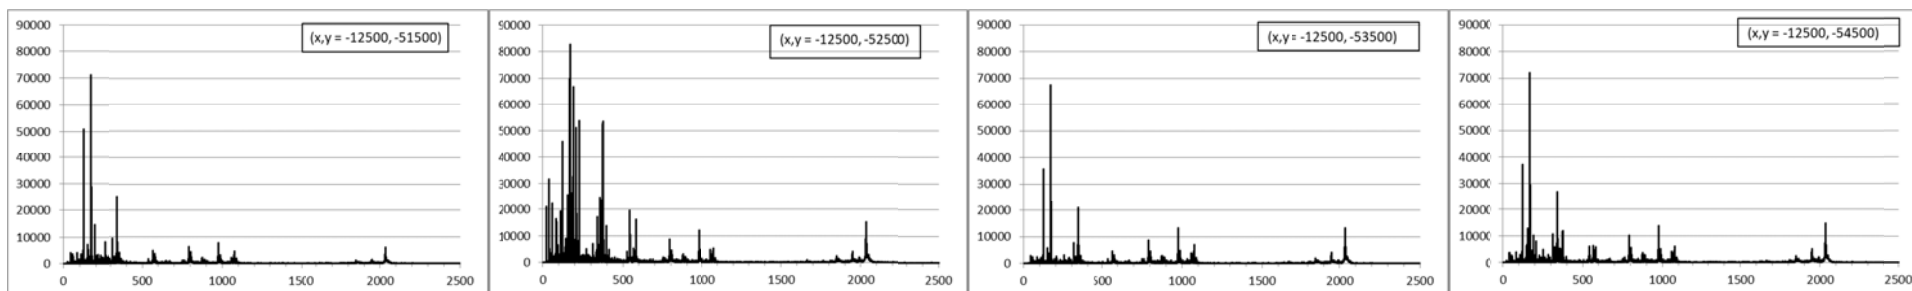

Supporting Information - Zipping and Unzipping Monolayers: Switchable Monolayer Oligomerization and Adhesion via Thiol - Disulfide Interconversion.

Jian He, Kyle J. Myerson and Matthew B. Zimmt

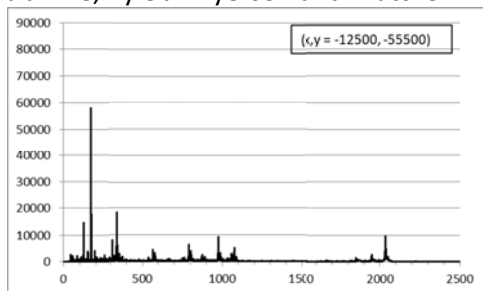

c) TOF mass spectra 1.8-2.5 kD region (**2b**): 5 samples (Intensity (y) axis scale 0-20000)

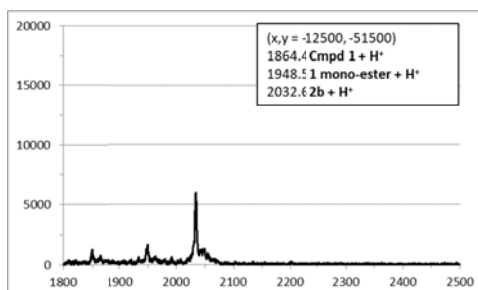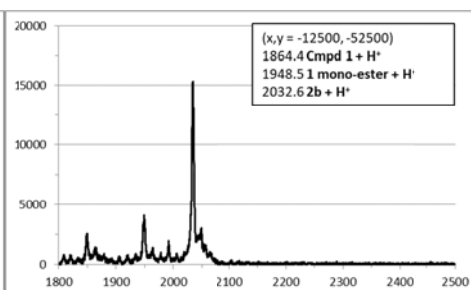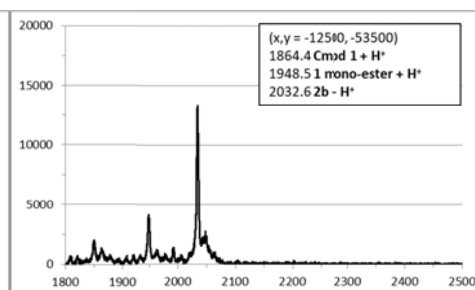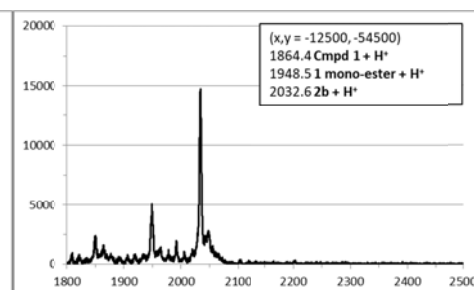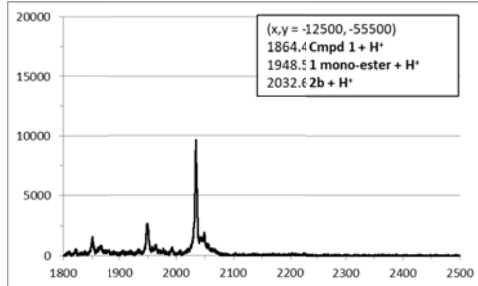

Jian He, Kyle J. Myerson and Matthew B. Zimmt

**ix) Fig. S6.** TOF mass spectra following in-situ reaction of monolayer **2a** with I<sub>2</sub> in DMF to form monolayer **(3)<sub>x</sub>**. Three spectral regions are presented for each spot sampled: the 0-2.6kD region, the 0-0.5kD region and the 1.8-2.6 kD region Mass spectra from the independent sample are displayed in blue.

a) Summary and statistical analysis of mass spectra peak intensities from independent experiments.

| measurement | samples | m/z   | assignment                      | Int. minimum | Int. maximum | Intensity average | Intensity st.dev. | st.dev. / < Int. > |
|-------------|---------|-------|---------------------------------|--------------|--------------|-------------------|-------------------|--------------------|
| Manuscript  | 5       | 169.3 | matrix ([THAP+H] <sup>+</sup> ) | 58900        | 95700        | <b>73200</b>      | <b>17800</b>      | <b>0.24</b>        |
| Independent | 3       | 169.3 | matrix ([THAP+H] <sup>+</sup> ) | 71300        | 83900        | <b>78400</b>      | <b>6400</b>       | <b>0.08</b>        |
| Manuscript  | 5       | 243.1 | Trityl cation                   | 950          | 2300         | <b>1460</b>       | <b>620</b>        | <b>0.43</b>        |
| Independent | 3       | 243.1 | Trityl cation                   | 990          | 1020         | <b>1010</b>       | <b>20</b>         | <b>0.02</b>        |
| Manuscript  | 5       | 1864  | [ <b>1</b> + H] <sup>+</sup>    | 270          | 480          | <b>350</b>        | <b>90</b>         | <b>0.26</b>        |
| Independent | 3       | 1864  | [ <b>1</b> + H] <sup>+</sup>    | 880          | 950          | <b>920</b>        | <b>30</b>         | <b>0.03</b>        |
| Manuscript  | 5       | 2040  | [ <b>3</b> + H] <sup>+</sup>    | 650          | 900          | <b>750</b>        | <b>100</b>        | <b>0.13</b>        |
| Independent | 3       | 2040  | [ <b>3</b> + H] <sup>+</sup>    | 460          | 540          | <b>500</b>        | <b>40</b>         | <b>0.08</b>        |

b) TOF mass spectra 0-2.6 kD region (**(3)<sub>x</sub>**): 5 samples and 3 samples (Intensity (y) axis scale 0-90000)

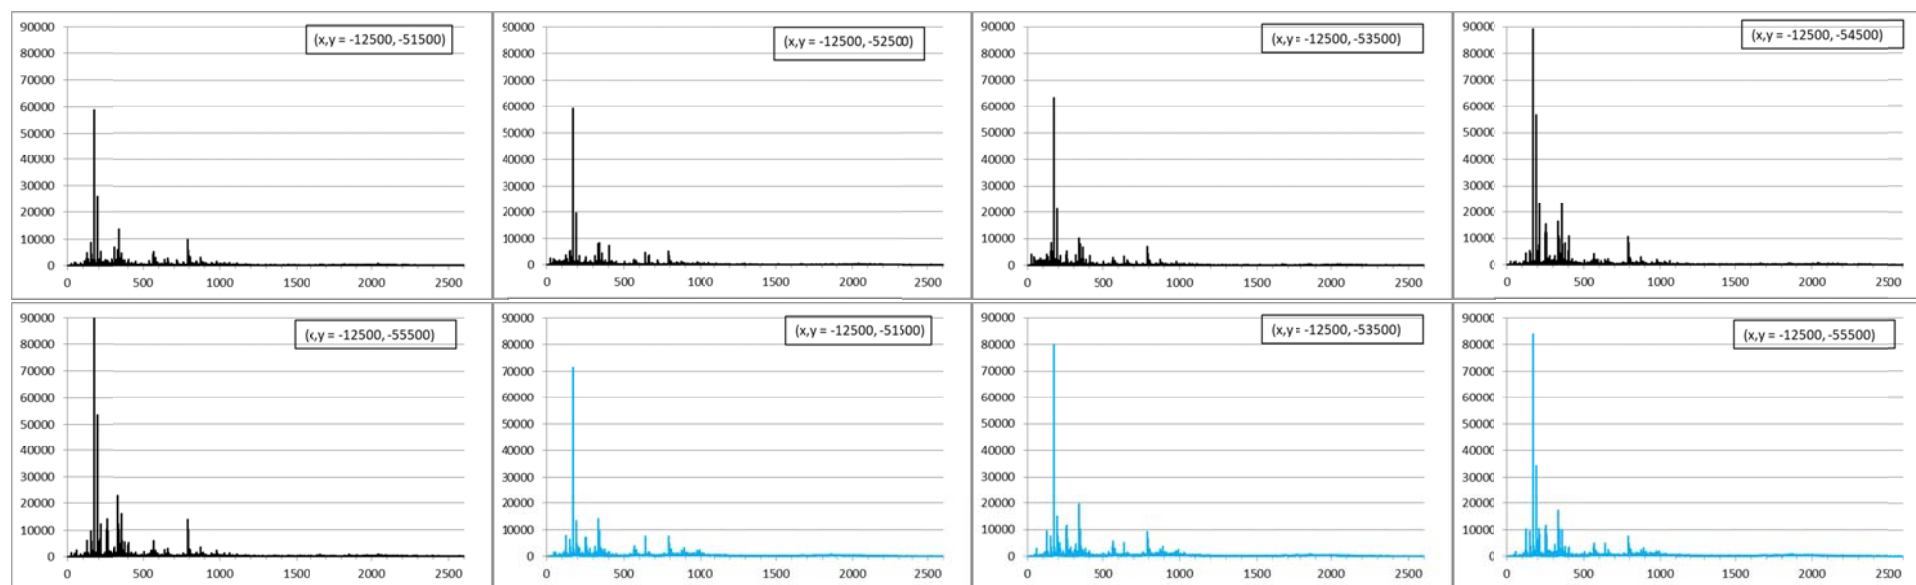

Supporting Information - Zipping and Unzipping Monolayers: Switchable Monolayer Oligomerization and Adhesion via Thiol - Disulfide Interconversion.

Jian He, Kyle J. Myerson and Matthew B. Zimmt

c) TOF mass spectra 0-0.5 kD region ((**3**)<sub>x</sub>): 5 samples and 3 samples (Intensity (y) axis scale 0-90000, arrow points to trityl cation peak at m/z = 243)

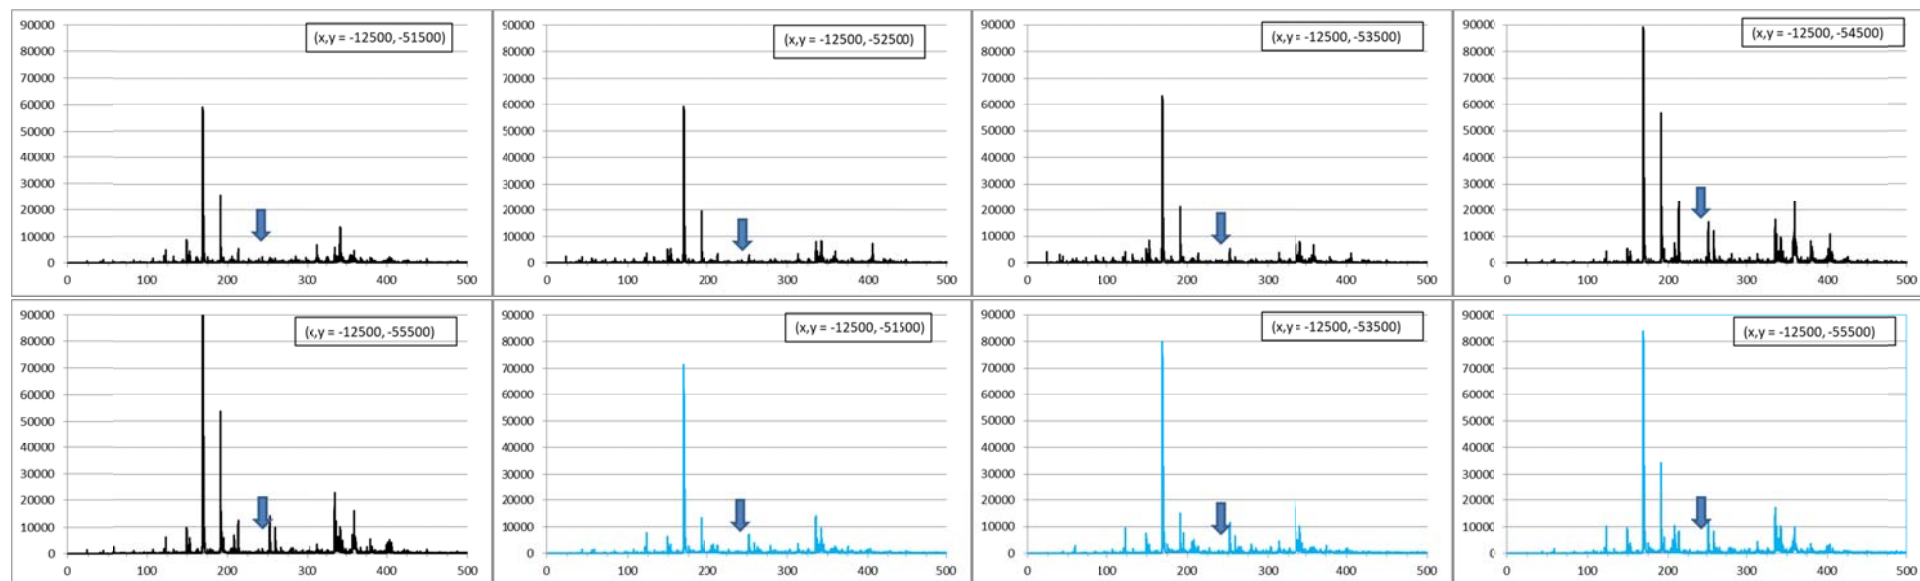

d) TOF mass spectra 1.8-2.6 kD region ((**3**)<sub>x</sub>): 5 samples and 3 samples (Intensity (y) axis scale 0-5000)

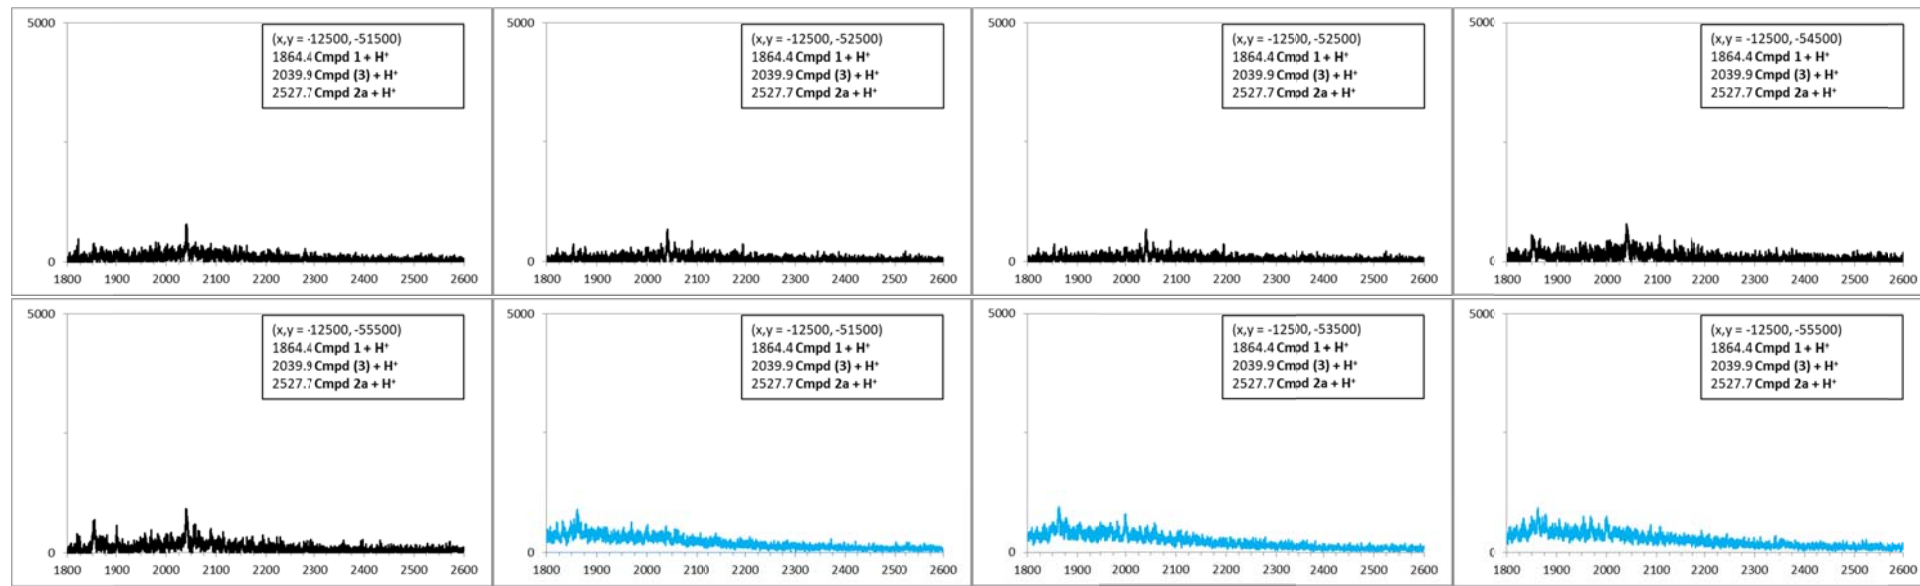

**(x) Fig. S7.** Alternative views of molecular mechanics minimized model showing next-nearest neighbor TPE<sub>2</sub> disulfide cross-link within one aryl column and thiol side chain approach in different aryl columns.

a) (right) Molecular mechanics model of a monolayer section with a disulfide cross-link between next-nearest neighbor TPE<sub>2</sub> molecules in one aryl column. The closest (O(CH<sub>2</sub>)<sub>6</sub>O<sub>2</sub>C(CH<sub>2</sub>)<sub>2</sub>SH) chains from TPE<sub>2</sub> molecules in different aryl columns (CPK) are not long enough to form an inter-column disulfide link.

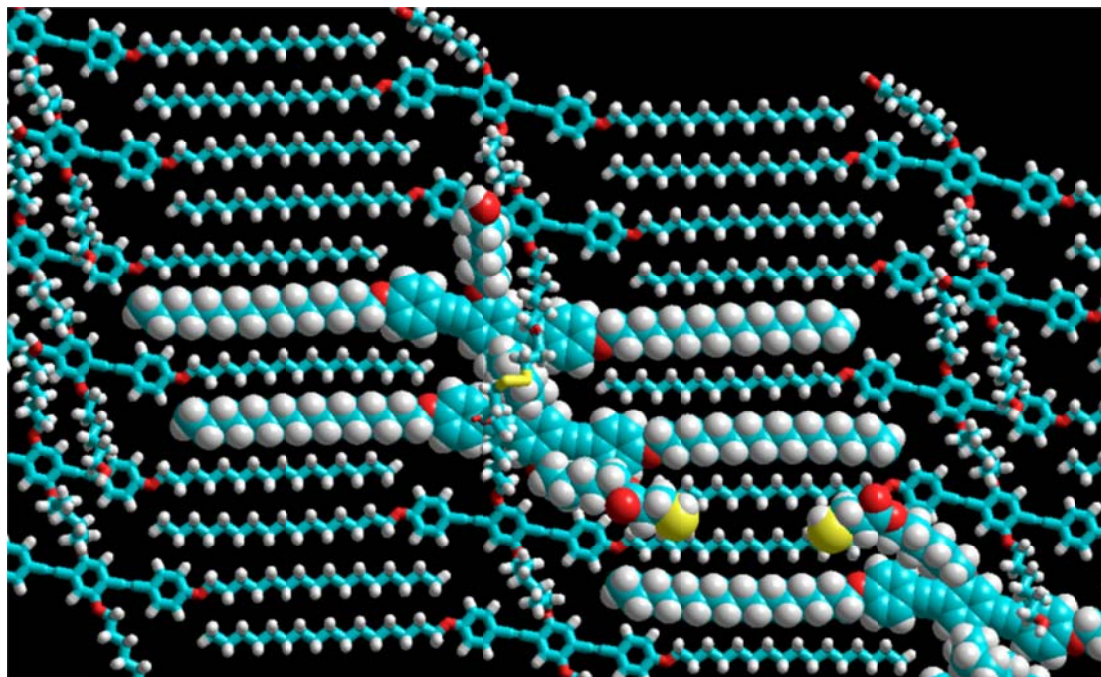

b) (below) Side view of the modeled monolayer section containing a disulfide cross-link (yellow, center) between next-nearest neighbor TPE<sub>2</sub> molecules in one aryl column. The sulfur atoms (yellow) on (O(CH<sub>2</sub>)<sub>6</sub>O<sub>2</sub>C(CH<sub>2</sub>)<sub>2</sub>SH) chains from TPE<sub>2</sub> molecules in different aryl columns are separated by 1.3 nm.

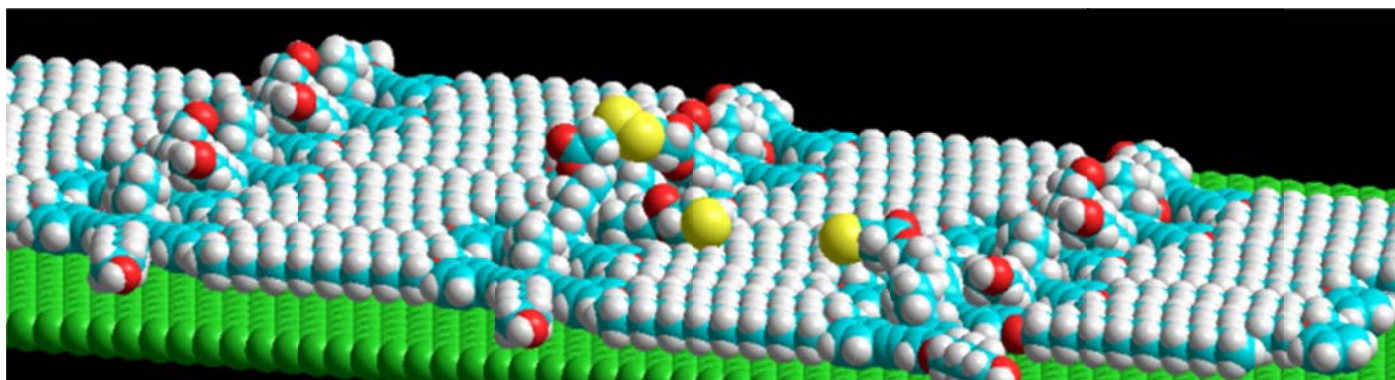

Jian He, Kyle J. Myerson and Matthew B. Zimmt

**(xi) Fig. S8.** TOF mass spectra following in-situ reduction of monolayer **(3)<sub>x</sub>** with DTT to form monolayer **3H<sub>2</sub>** (one cycle)

a) Summary and statistical analysis of mass spectra peak intensities from independent experiments.

| measurement    | samples   | m/z          | assignment                                                 | Int. minimum | Int. maximum | Intensity average  | Intensity st.dev. | st.dev. / < Int. > |
|----------------|-----------|--------------|------------------------------------------------------------|--------------|--------------|--------------------|-------------------|--------------------|
| Manu Study-1   | 10        | 169.3        | matrix ([THAP+H] <sup>+</sup> )                            | 75900        | 112000       | <b>86700</b>       | <b>11600</b>      | <b>0.13</b>        |
| Manu Study-2   | 10        | 169.3        | matrix ([THAP+H] <sup>+</sup> )                            | 66200        | 99900        | <b>82500</b>       | <b>11600</b>      | <b>0.14</b>        |
| Repeat 1       | 10        | 169.3        | matrix ([THAP+H] <sup>+</sup> )                            | 67900        | 105000       | <b>93700</b>       | <b>10100</b>      | <b>0.11</b>        |
| Repeat 2       | 10        | 169.3        | matrix ([THAP+H] <sup>+</sup> )                            | 50800        | 102000       | <b>86900</b>       | <b>15300</b>      | <b>0.18</b>        |
| <b>Average</b> | <b>40</b> | <b>169.3</b> | <b>matrix ([THAP+H]<sup>+</sup>)</b>                       |              |              | <b>87400±12100</b> |                   |                    |
| Manu Study-1   | 10        | 2040         | [ <b>3-H<sub>2</sub> + H</b> ] <sup>+</sup>                | 2400         | 8200         | <b>5900</b>        | <b>1800</b>       | <b>0.31</b>        |
| Manu Study-2   | 10        | 2040         | [ <b>3-H<sub>2</sub> + H</b> ] <sup>+</sup>                | 7900         | 14700        | <b>10400</b>       | <b>2300</b>       | <b>0.22</b>        |
| Repeat 1       | 10        | 2040         | [ <b>3-H<sub>2</sub> + H</b> ] <sup>+</sup>                | 3200         | 13700        | <b>8900</b>        | <b>3500</b>       | <b>0.39</b>        |
| Repeat 2       | 10        | 2040         | [ <b>3-H<sub>2</sub> + H</b> ] <sup>+</sup>                | 5600         | 13900        | <b>11100</b>       | <b>2300</b>       | <b>0.20</b>        |
| <b>Average</b> | <b>40</b> | <b>2040</b>  | <b>[3-H<sub>2</sub> + H]<sup>+</sup></b>                   |              |              | <b>9100±2500</b>   |                   |                    |
| Manu Study-1   | 10        | 2088         | [ <b>3-H(O<sub>3</sub>H) + H</b> ] <sup>+</sup>            | 330          | 610          | <b>500</b>         | <b>100</b>        | <b>0.20</b>        |
| Manu Study-2   | 10        | 2088         | [ <b>3-H(O<sub>3</sub>H) + H</b> ] <sup>+</sup>            | 300          | 830          | <b>520</b>         | <b>170</b>        | <b>0.33</b>        |
| Repeat 1       | 10        | 2088         | [ <b>3-H(O<sub>3</sub>H) + H</b> ] <sup>+</sup>            | 200          | 1100         | <b>730</b>         | <b>270</b>        | <b>0.37</b>        |
| Repeat 2       | 10        | 2088         | [ <b>3-H(O<sub>3</sub>H) + H</b> ] <sup>+</sup>            | 160          | 690          | <b>470</b>         | <b>160</b>        | <b>0.33</b>        |
| <b>Average</b> | <b>40</b> | <b>2088</b>  | <b>[3-H(O<sub>3</sub>H) + H]<sup>+</sup></b>               |              |              | <b>550±180</b>     |                   |                    |
| Manu Study-1   | 10        | 2136         | [ <b>3-(O<sub>3</sub>H)<sub>2</sub> + H</b> ] <sup>+</sup> | 120          | 440          | <b>280</b>         | <b>110</b>        | <b>0.39</b>        |
| Manu Study-2   | 10        | 2136         | [ <b>3-(O<sub>3</sub>H)<sub>2</sub> + H</b> ] <sup>+</sup> | 120          | 1200         | <b>330</b>         | <b>320</b>        | <b>0.99</b>        |
| Repeat 1       | 10        | 2136         | [ <b>3-(O<sub>3</sub>H)<sub>2</sub> + H</b> ] <sup>+</sup> | 80           | 470          | <b>290</b>         | <b>120</b>        | <b>0.41</b>        |
| Repeat 2       | 10        | 2136         | [ <b>3-(O<sub>3</sub>H)<sub>2</sub> + H</b> ] <sup>+</sup> | 470          | 1260         | <b>870</b>         | <b>310</b>        | <b>0.35</b>        |
| <b>Average</b> | <b>40</b> | <b>2136</b>  | <b>[3-(O<sub>3</sub>H)<sub>2</sub> + H]<sup>+</sup></b>    |              |              | <b>440±220</b>     |                   |                    |

b) Structures of TPE<sub>2</sub> fragment ions observed at (left) m/z = 1952.4 / 1954.0 and (right) 1852.4 / 1853.9 in mass spectra of **3-H<sub>2</sub>** monolayers.

The numbers (before / after) are the monoisotopic / average ion m/z values.

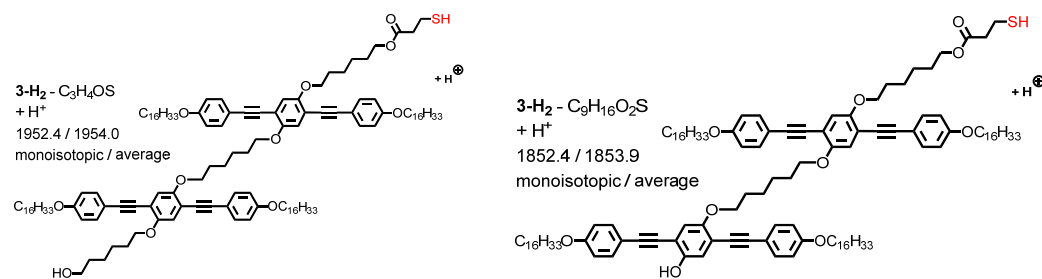

Supporting Information - Zipping and Unzipping Monolayers: Switchable Monolayer Oligomerization and Adhesion via Thiol - Disulfide Interconversion.

Jian He, Kyle J. Myerson and Matthew B. Zimmt

c) TOF mass spectra 0-2.5 kD region ( $3\text{-H}_2$ ): 40 samples (4 trials), intensity (y) axis scale 0-90000.

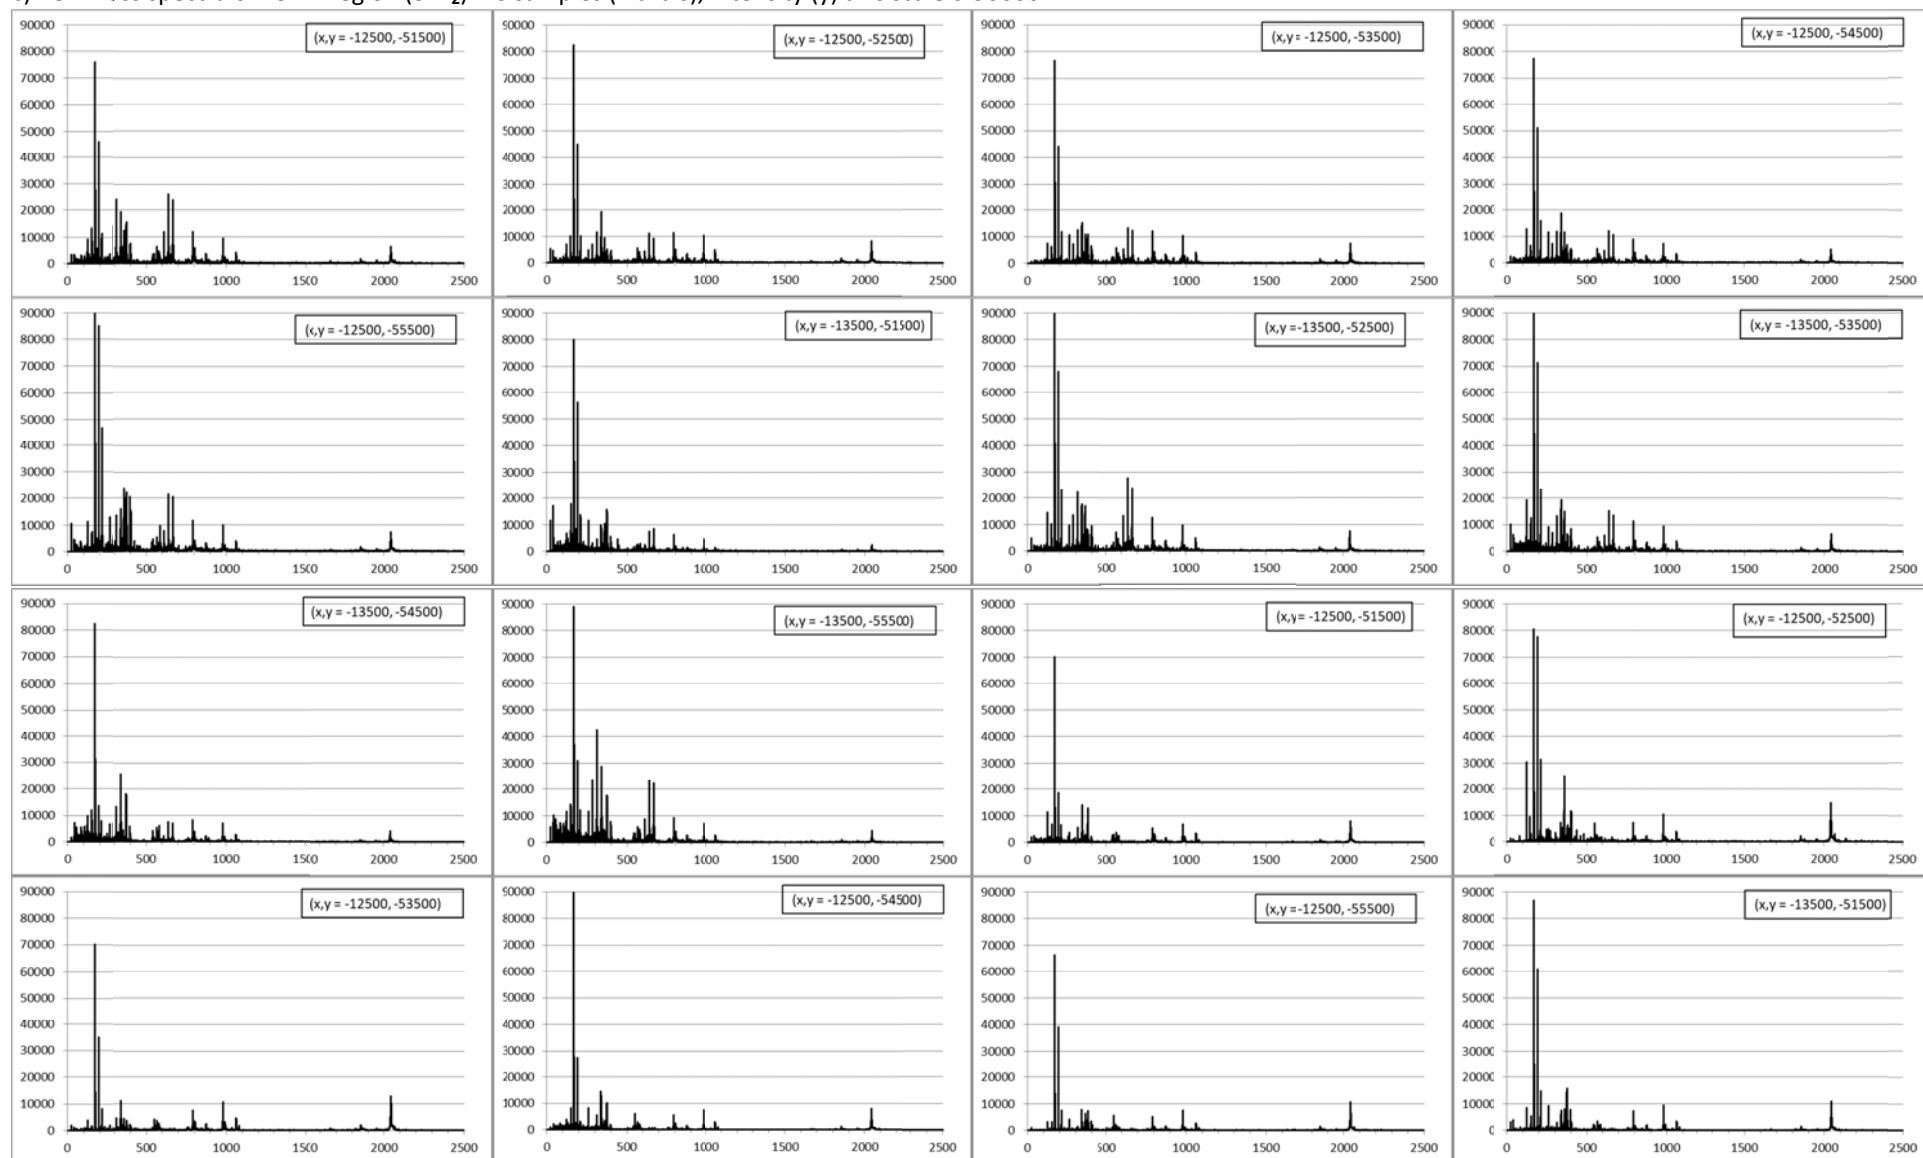

# Supporting Information - Zipping and Unzipping Monolayers: Switchable Monolayer Oligomerization and Adhesion via Thiol - Disulfide Interconversion.

Jian He, Kyle J. Myerson and Matthew B. Zimmt

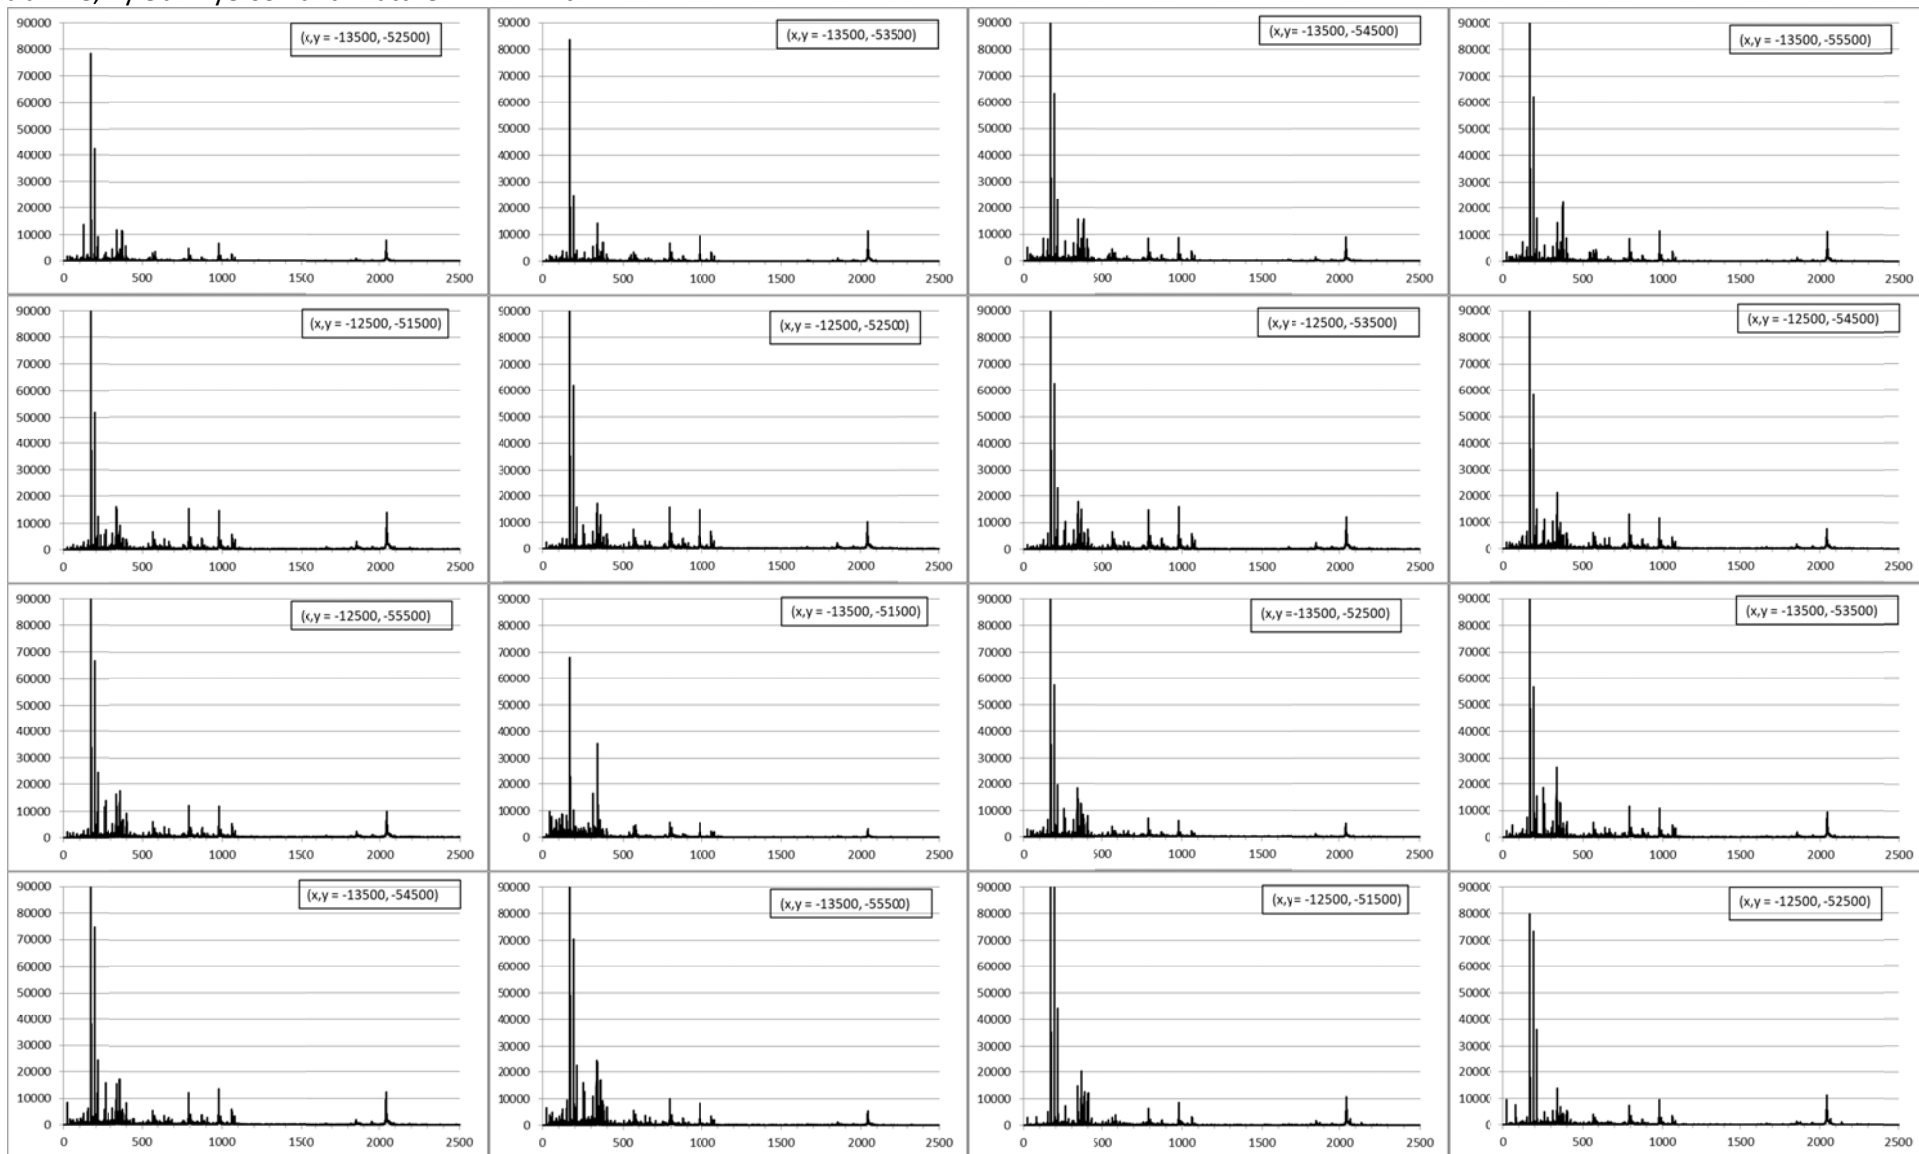



Supporting Information - Zipping and Unzipping Monolayers: Switchable Monolayer Oligomerization and Adhesion via Thiol - Disulfide Interconversion.

Jian He, Kyle J. Myerson and Matthew B. Zimmt

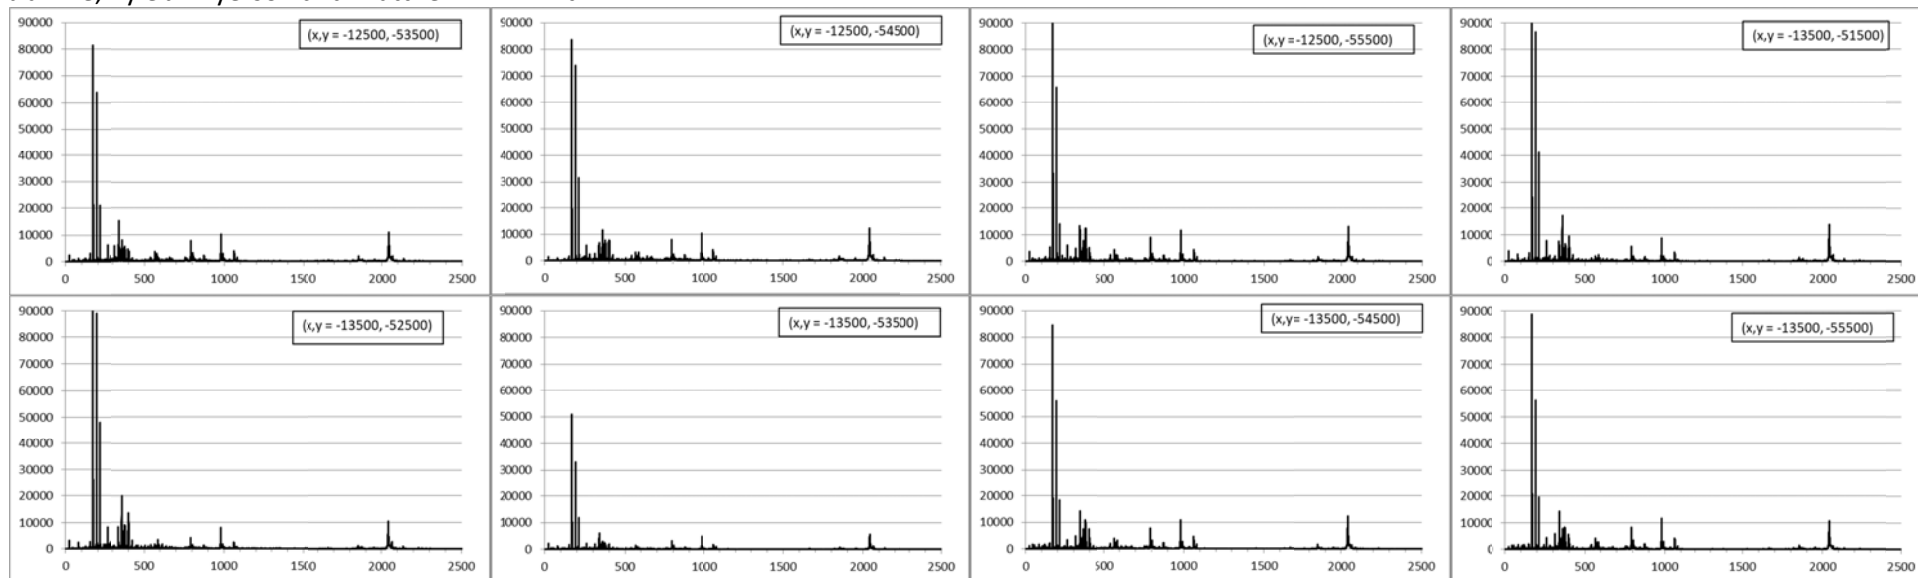

d) TOF mass spectra 1.8-2.6 kD region (**3-H<sub>2</sub>**): 40 samples (4 trials), intensity (y) axis scale 0-15000

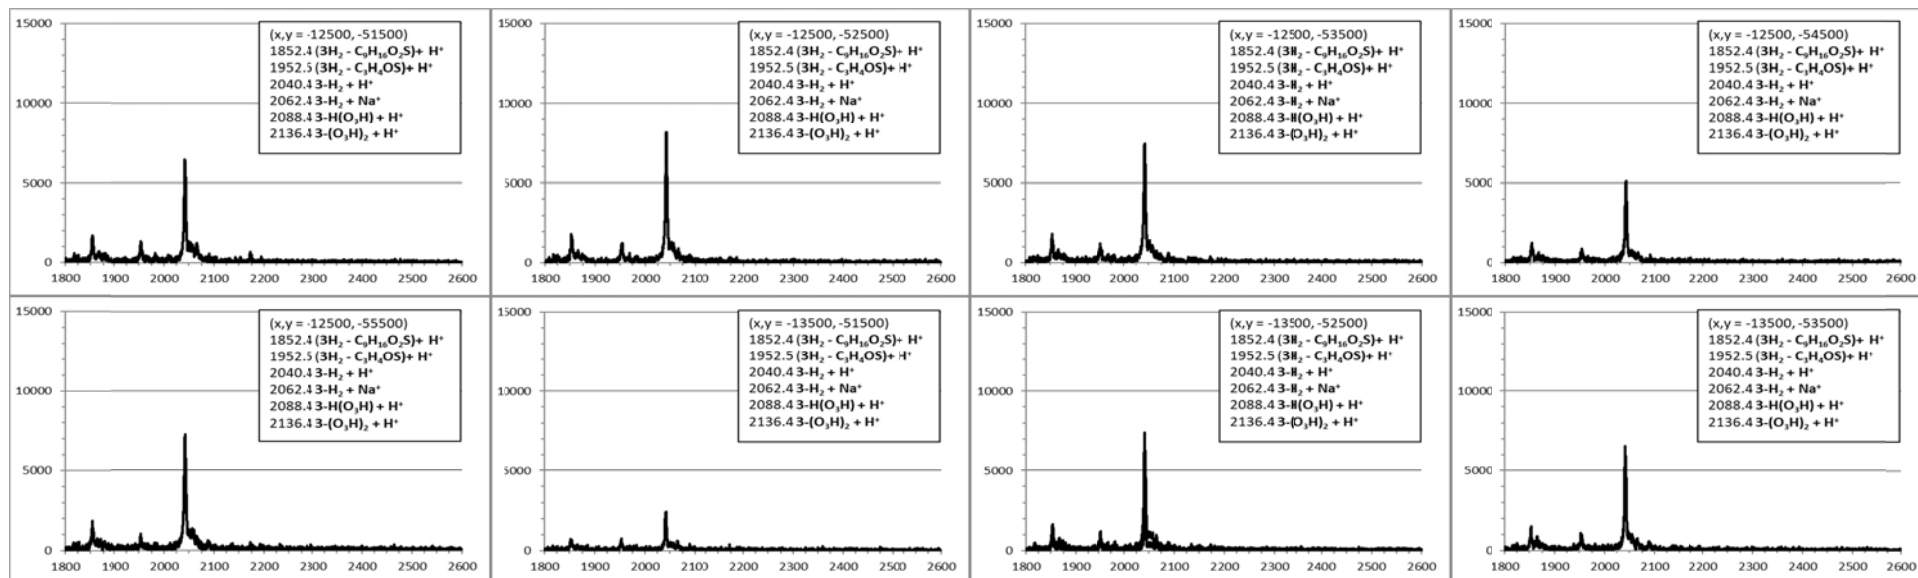

# Supporting Information - Zipping and Unzipping Monolayers: Switchable Monolayer Oligomerization and Adhesion via Thiol - Disulfide Interconversion.

Jian He, Kyle J. Myerson and Matthew B. Zimmt

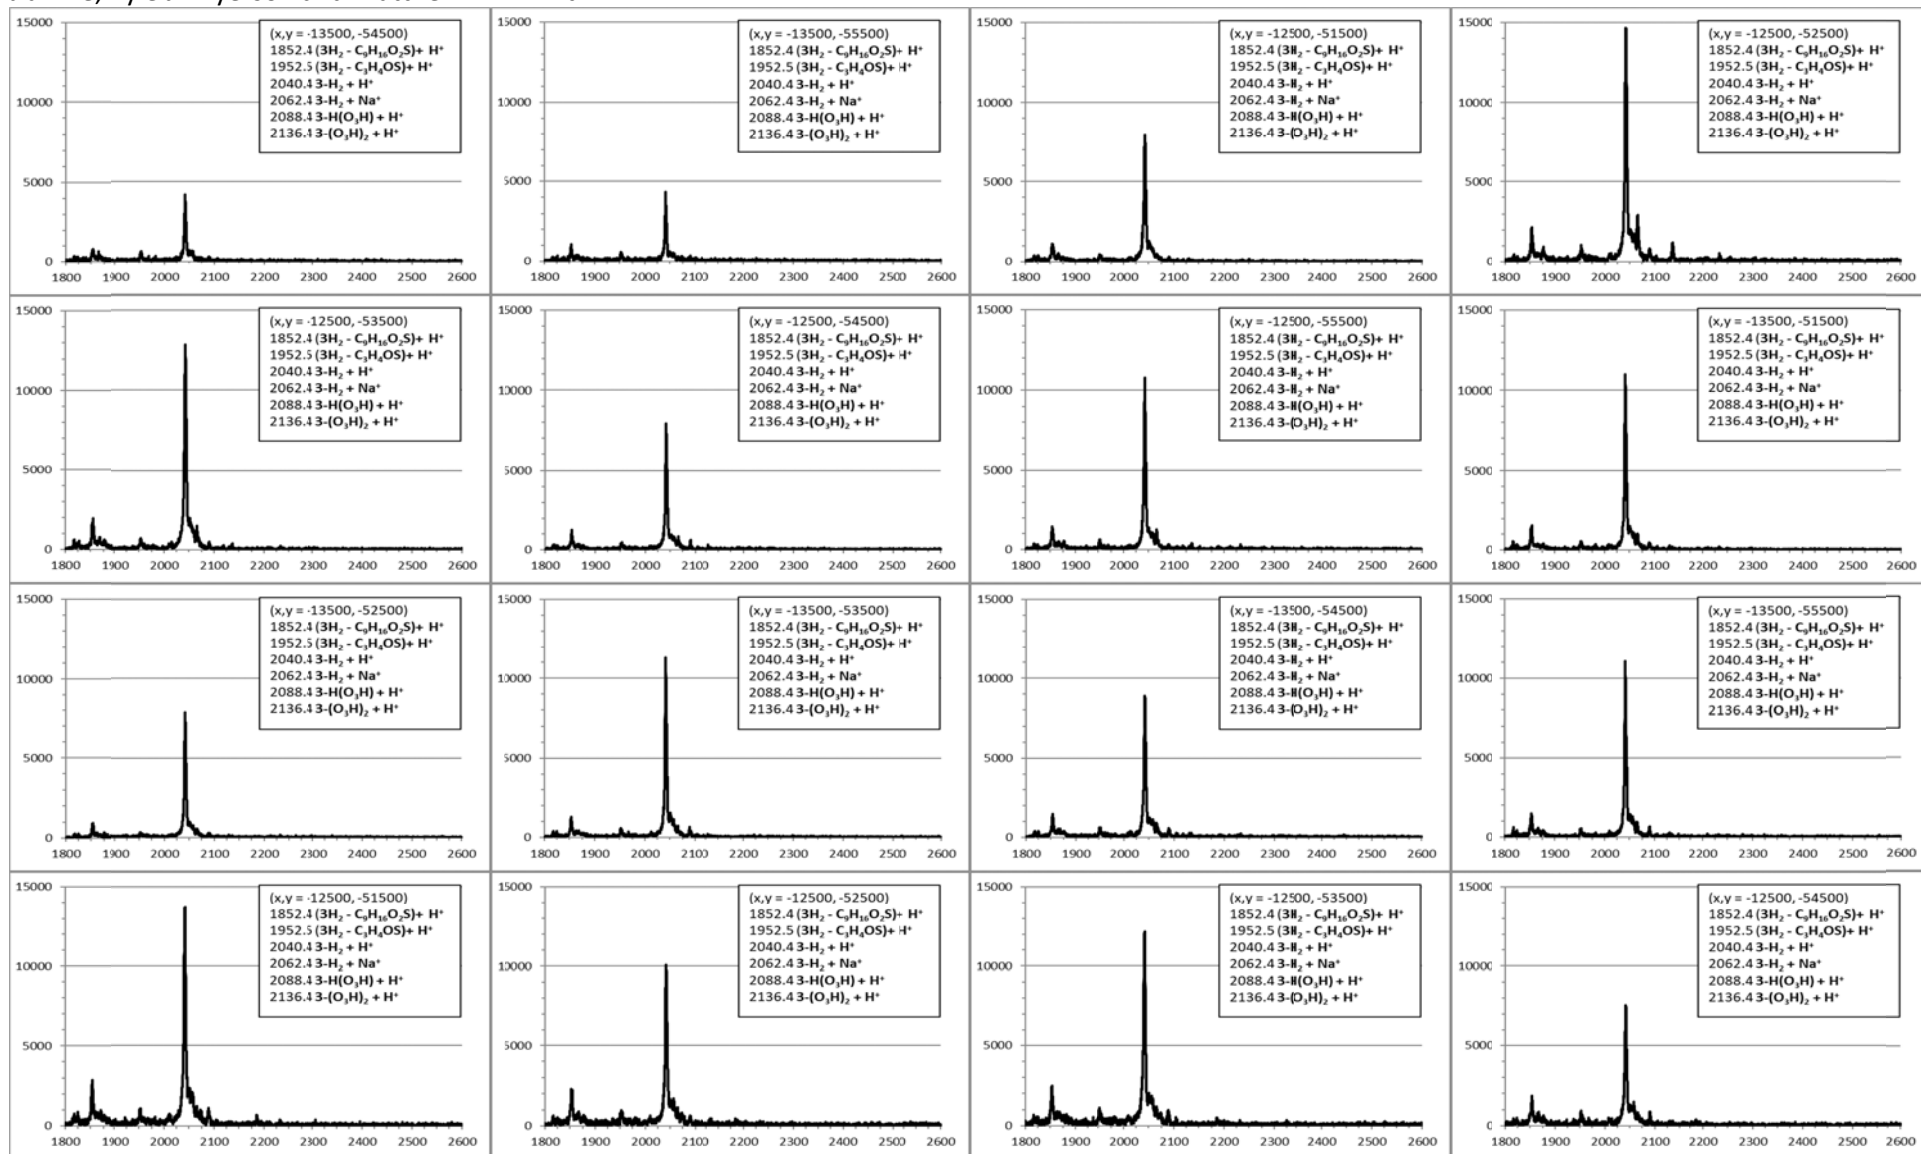

# Supporting Information - Zipping and Unzipping Monolayers: Switchable Monolayer Oligomerization and Adhesion via Thiol - Disulfide Interconversion.

Jian He, Kyle J. Myerson and Matthew B. Zimmt

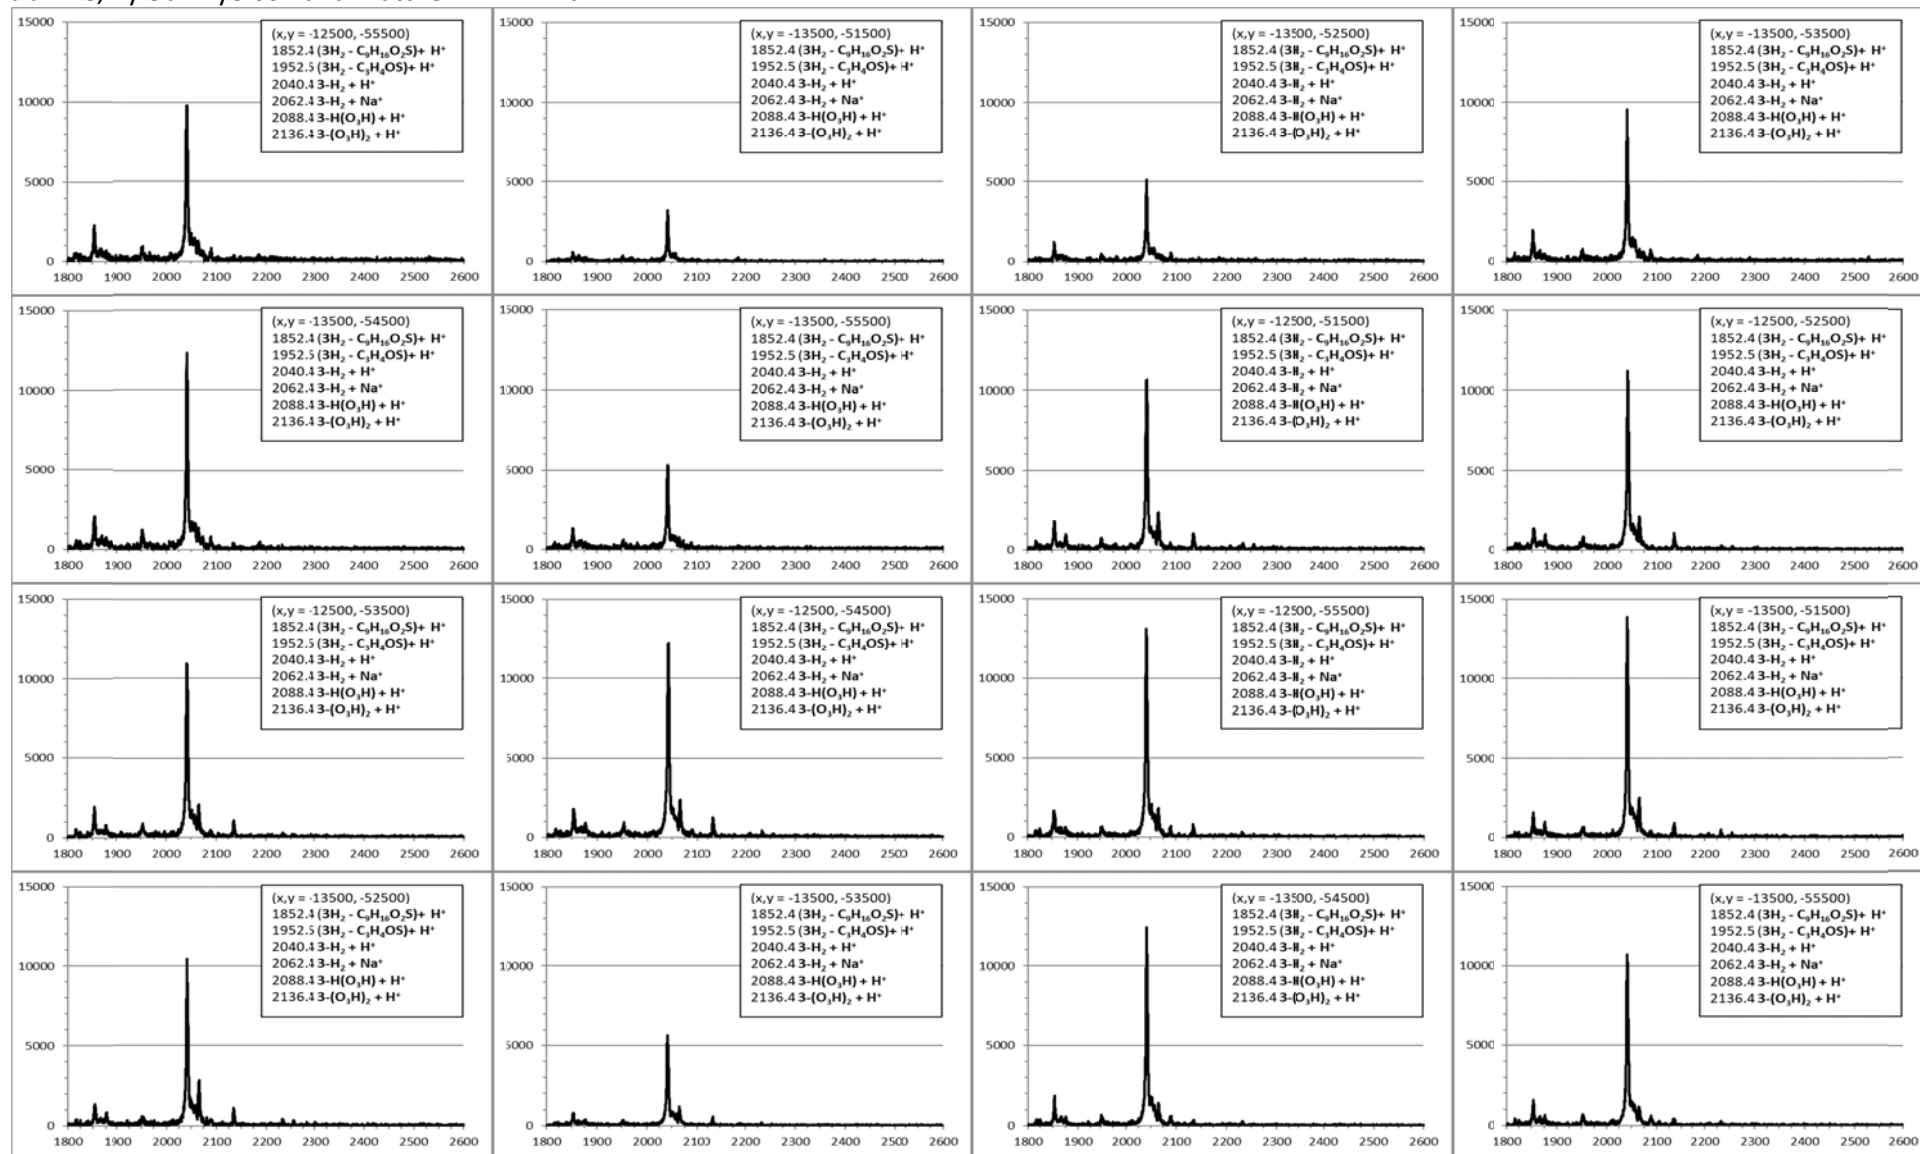

Jian He, Kyle J. Myerson and Matthew B. Zimmt

**(xii) Fig. S9.** TOF mass spectra of **3-H<sub>2</sub>** monolayer formed by DTT reduction of **3-(SR')**<sub>2</sub> monolayer (SR' = S(CH<sub>2</sub>)<sub>2</sub>CO<sub>2</sub>Et).

a) Summary and statistical analysis of mass spectra peak intensities.

| measurement                         | samples | m/z   | assignment                                                                                                      | Int. minimum | Int. maximum | Intensity average | Intensity st.dev. | st.dev. / < Int. > |
|-------------------------------------|---------|-------|-----------------------------------------------------------------------------------------------------------------|--------------|--------------|-------------------|-------------------|--------------------|
| <b>3-(SR')</b> <sub>2</sub> +DTT #1 | 10      | 169.3 | matrix ([THAP+H] <sup>+</sup> )                                                                                 | 32100        | 112000       | <b>84800</b>      | <b>22900</b>      | <b>0.27</b>        |
| <b>3-(SR')</b> <sub>2</sub> +DTT #2 | 10      | 169.3 | matrix ([THAP+H] <sup>+</sup> )                                                                                 | 64600        | 121000       | <b>98500</b>      | <b>18600</b>      | <b>0.19</b>        |
| <b>3-(SR')</b> <sub>2</sub> +DTT #1 | 10      | 2040  | [ <b>3-H<sub>2</sub></b> + H ] <sup>+</sup>                                                                     | 6500         | 16400        | <b>11000</b>      | <b>3400</b>       | <b>0.31</b>        |
| <b>3-(SR')</b> <sub>2</sub> +DTT #2 | 10      | 2040  | [ <b>3-H<sub>2</sub></b> + H ] <sup>+</sup>                                                                     | 6900         | 15100        | <b>10800</b>      | <b>2400</b>       | <b>0.23</b>        |
| <b>3-(SR')</b> <sub>2</sub> +DTT #1 | 10      | 2085  | [ <b>3-(SR')</b> <sub>2</sub> - C <sub>8</sub> H <sub>12</sub> O <sub>3</sub> S <sub>2</sub> + H ] <sup>+</sup> | 220          | 560          | <b>390</b>        | <b>140</b>        | <b>0.35</b>        |
| <b>3-(SR')</b> <sub>2</sub> +DTT #2 | 10      | 2085  | [ <b>3-(SR')</b> <sub>2</sub> - C <sub>8</sub> H <sub>12</sub> O <sub>3</sub> S <sub>2</sub> + H ] <sup>+</sup> | 270          | 630          | <b>450</b>        | <b>120</b>        | <b>0.27</b>        |
| <b>3-(SR')</b> <sub>2</sub> +DTT #1 | 10      | 2173  | [ <b>3-(SR')</b> <sub>2</sub> - C <sub>5</sub> H <sub>8</sub> O <sub>2</sub> S + H ] <sup>+</sup>               | 260          | 1600         | <b>760</b>        | <b>420</b>        | <b>0.56</b>        |
| <b>3-(SR')</b> <sub>2</sub> +DTT #1 | 10      | 2173  | [ <b>3-(SR')</b> <sub>2</sub> - C <sub>5</sub> H <sub>8</sub> O <sub>2</sub> S + H ] <sup>+</sup>               | 570          | 1900         | <b>1200</b>       | <b>440</b>        | <b>0.36</b>        |
| <b>3-(SR')</b> <sub>2</sub> +DTT #1 | 10      | 2305  | [ <b>3-(SR')</b> <sub>2</sub> + H ] <sup>+</sup>                                                                | 130          | 360          | <b>250</b>        | <b>90</b>         | <b>0.34</b>        |
| <b>3-(SR')</b> <sub>2</sub> +DTT #2 | 10      | 2305  | [ <b>3-(SR')</b> <sub>2</sub> + H ] <sup>+</sup>                                                                | 160          | 630          | <b>350</b>        | <b>150</b>        | <b>0.42</b>        |

b) Structures of TPE<sub>2</sub> ions observed after DTT reduction of **3-(SR')**<sub>2</sub> monolayer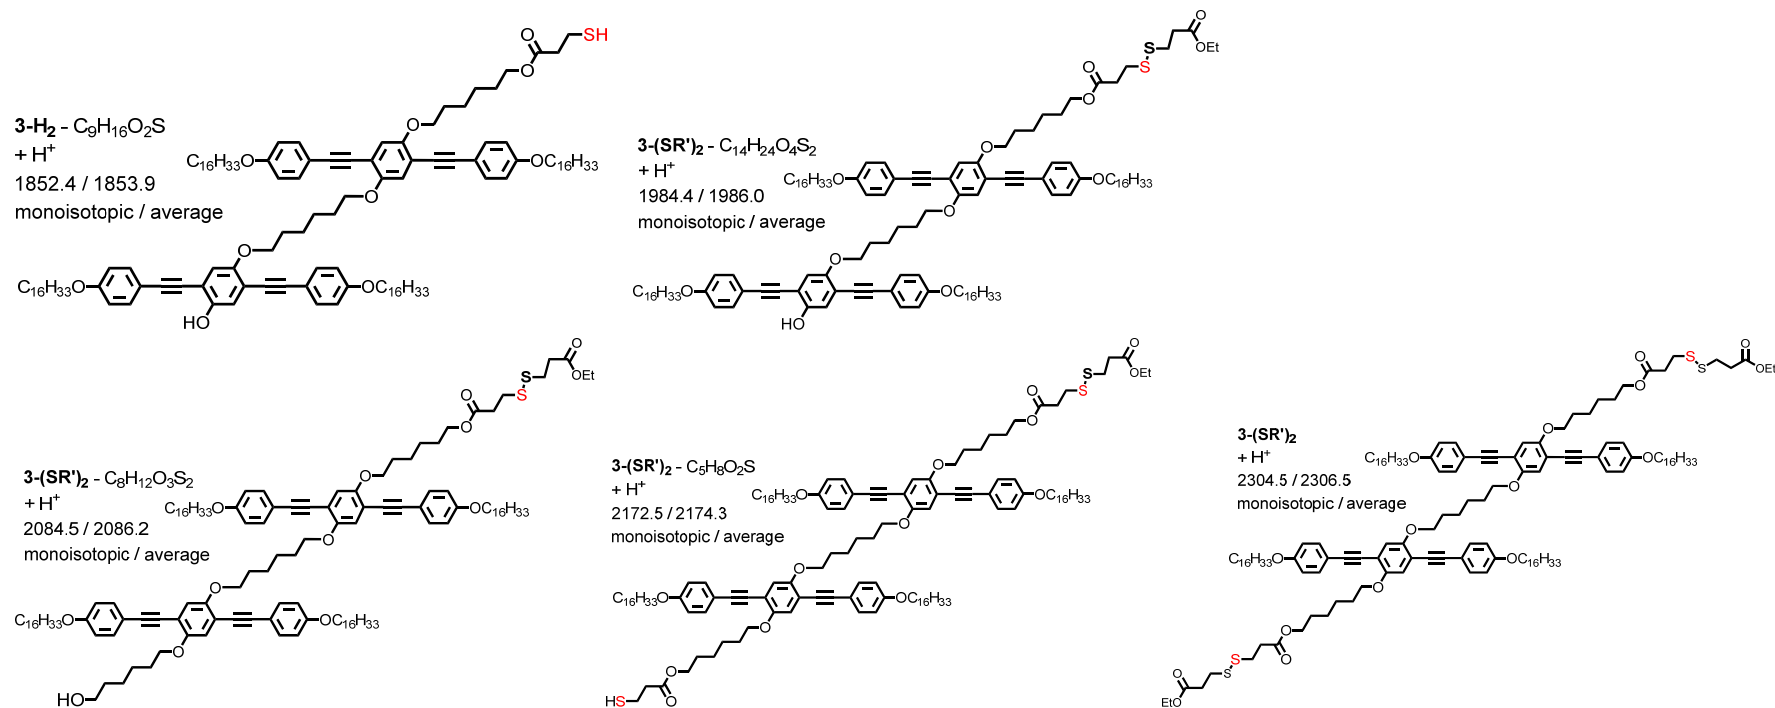

Supporting Information - Zipping and Unzipping Monolayers: Switchable Monolayer Oligomerization and Adhesion via Thiol - Disulfide Interconversion.  
Jian He, Kyle J. Myerson and Matthew B. Zimmt

c) TOF mass spectra 0-2.5 kD region (**3-H<sub>2</sub>**): 20 samples (2 trials), intensity (y) axis scale 0-90000.

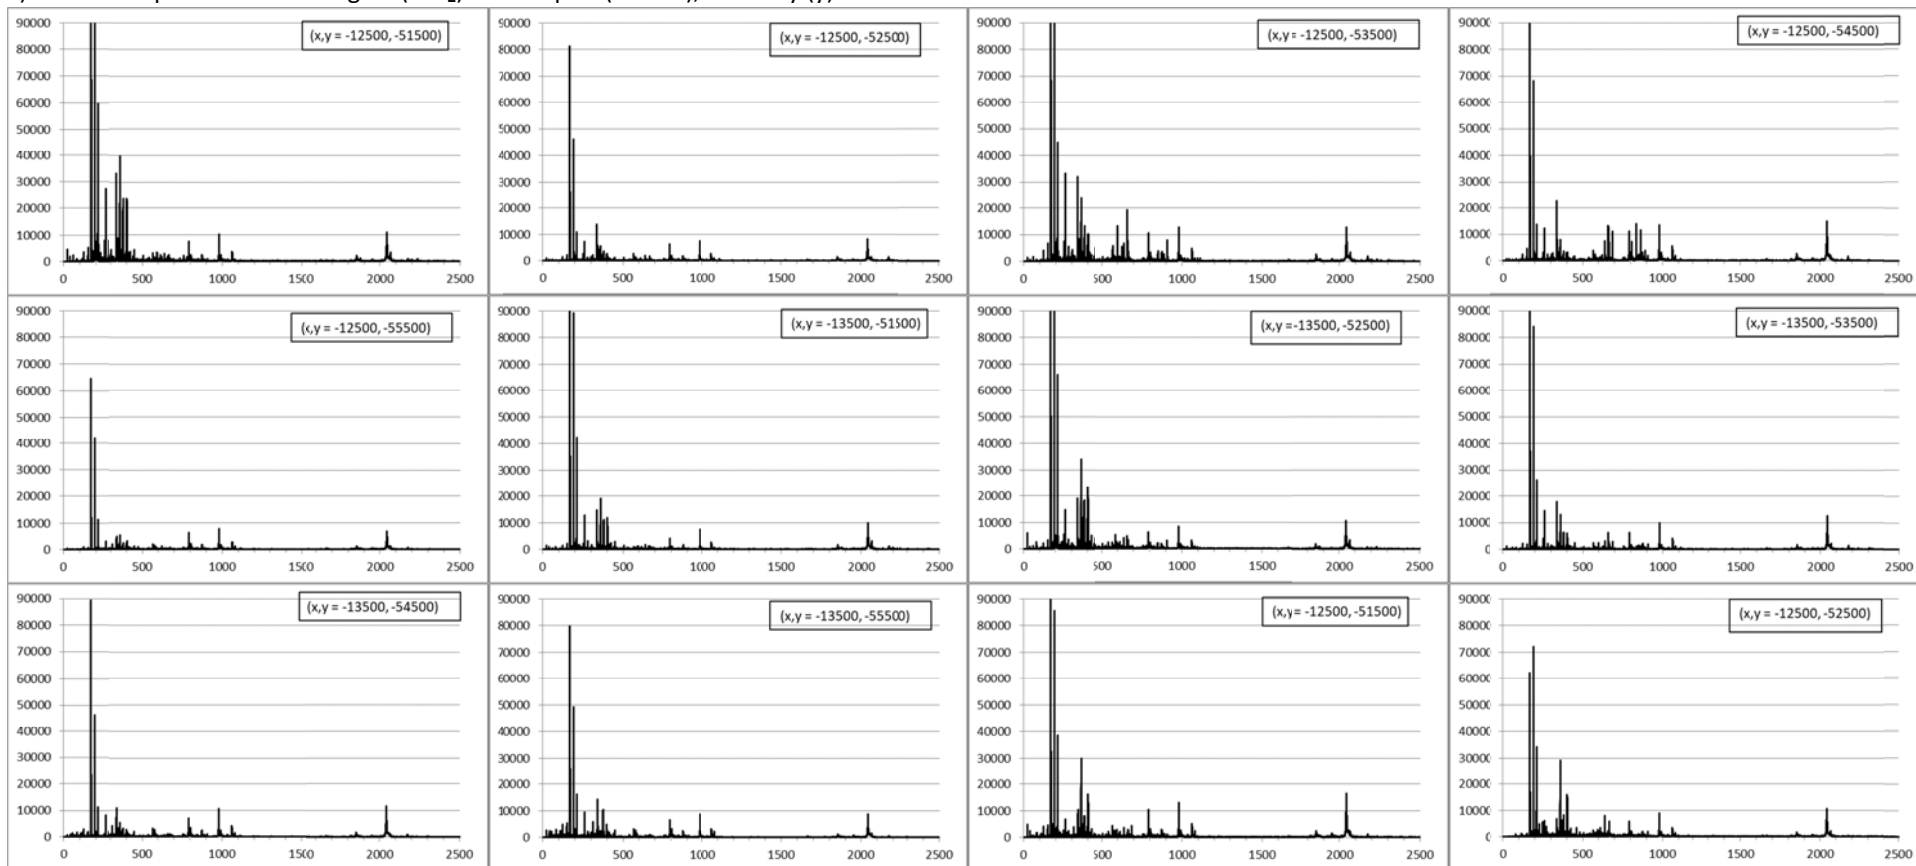

Supporting Information - Zipping and Unzipping Monolayers: Switchable Monolayer Oligomerization and Adhesion via Thiol - Disulfide Interconversion.

Jian He, Kyle J. Myerson and Matthew B. Zimmt

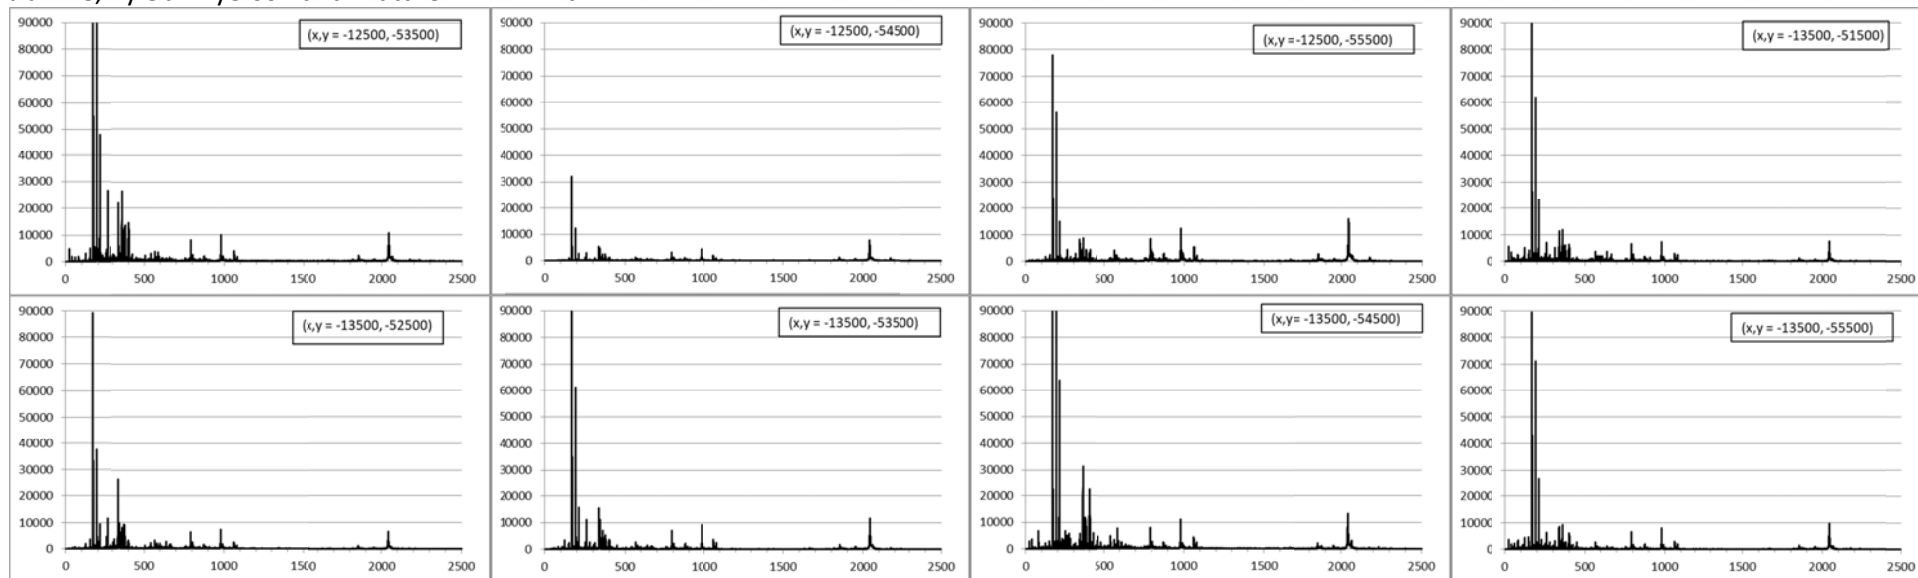

d) TOF mass spectra 1.8-2.6 kD region ( $3\text{-H}_2$ ): 20 samples (2 trials), intensity (y) axis scale 0-20000.

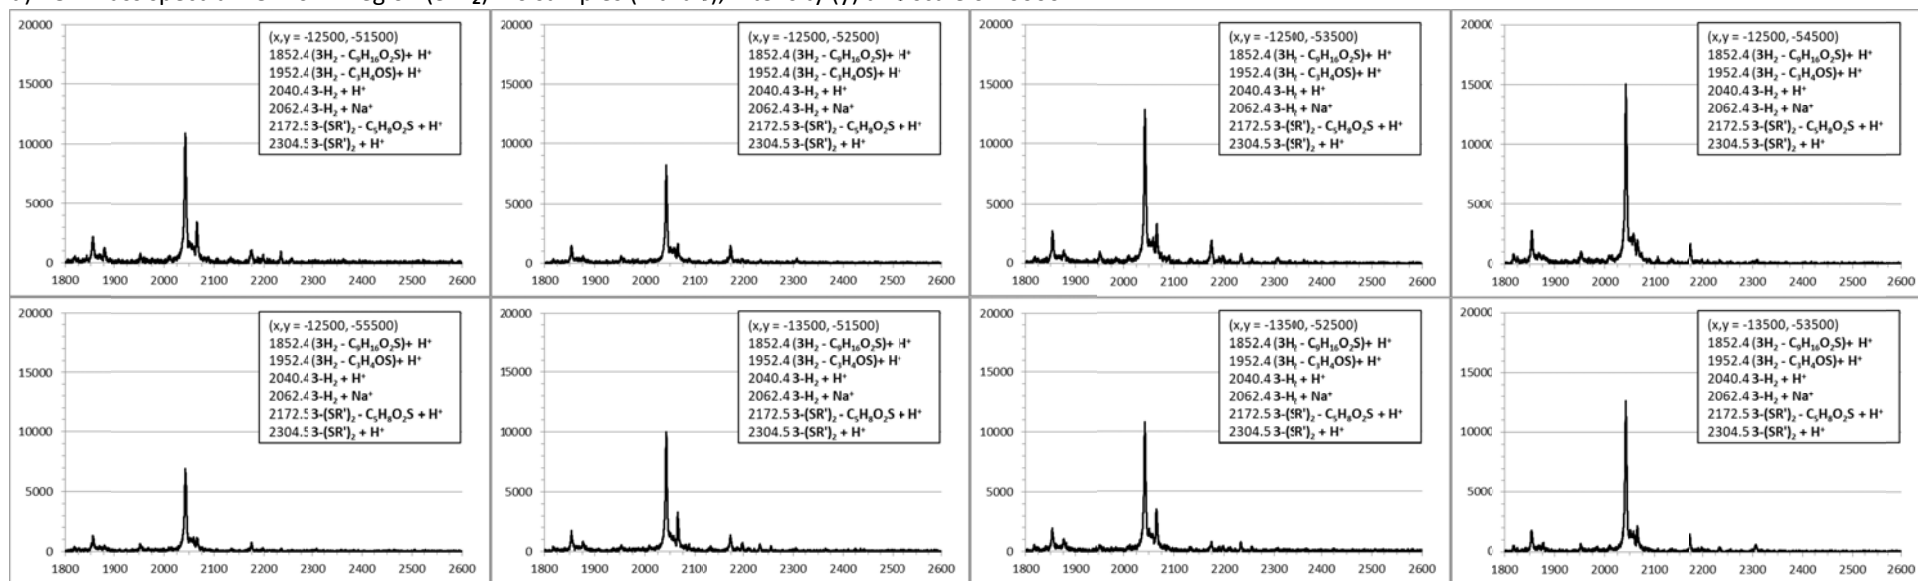

Supporting Information - Zipping and Unzipping Monolayers: Switchable Monolayer Oligomerization and Adhesion via Thiol - Disulfide Interconversion.  
 Jian He, Kyle J. Myerson and Matthew B. Zimmt

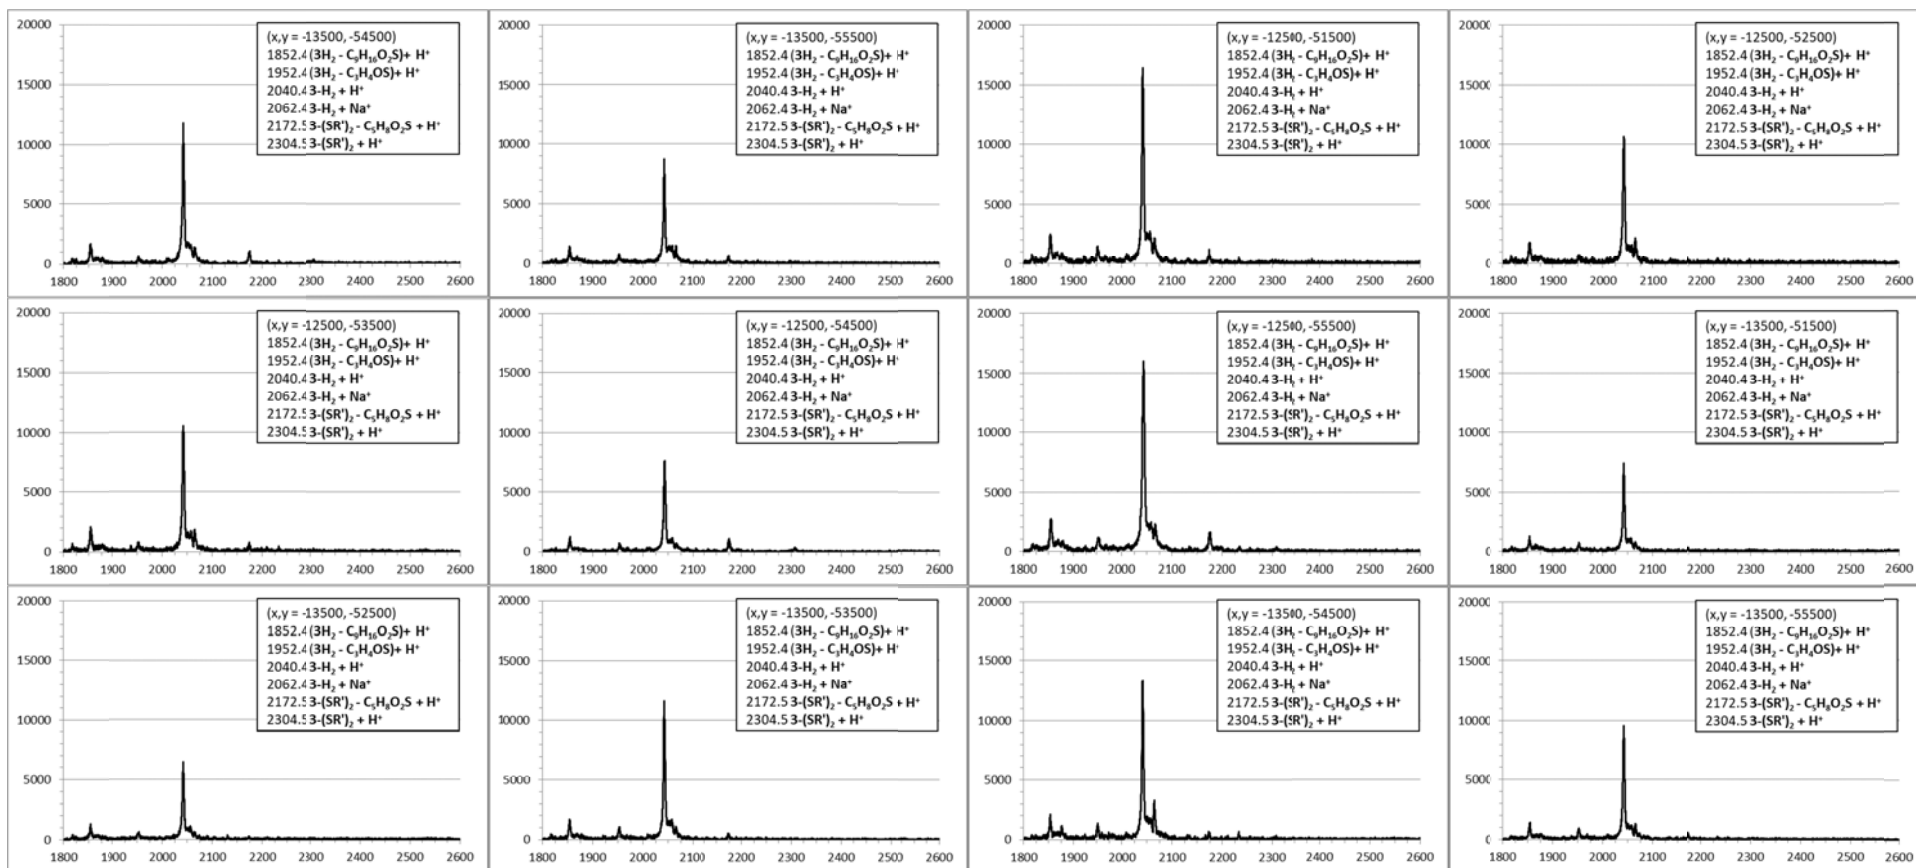

**(xiii) Fig. S10.** TOF mass spectra of **3-(SR')**<sub>2</sub> monolayer (SR' = S(CH<sub>2</sub>)<sub>2</sub>CO<sub>2</sub>Et) formed via esterification of **1** monolayer with HO<sub>2</sub>C(CH<sub>2</sub>)<sub>2</sub>SSR' /EDC / DMAP.

a) Summary and statistical analysis of mass spectra peak intensities.

| measurement                      | samples | m/z   | assignment                                                                                                     | Int. minimum | Int. maximum | Intensity average | Intensity st.dev. | st.dev. / < Int. > |
|----------------------------------|---------|-------|----------------------------------------------------------------------------------------------------------------|--------------|--------------|-------------------|-------------------|--------------------|
| <b>3-(SR')</b> <sub>2</sub> prep | 10      | 169.3 | matrix ([THAP+H] <sup>+</sup> )                                                                                | 57500        | 85300        | <b>67800</b>      | <b>7600</b>       | <b>0.11</b>        |
| <b>3-(SR')</b> <sub>2</sub> prep | 10      | 1864  | [ <b>1</b> + H] <sup>+</sup>                                                                                   | 190          | 510          | <b>330</b>        | <b>100</b>        | <b>0.33</b>        |
| <b>3-(SR')</b> <sub>2</sub> prep | 10      | 2085  | [ <b>3-(SR')</b> <sub>2</sub> - C <sub>8</sub> H <sub>12</sub> O <sub>3</sub> S <sub>2</sub> + H] <sup>+</sup> | 670          | 1200         | <b>1000</b>       | <b>180</b>        | <b>0.18</b>        |
| <b>3-(SR')</b> <sub>2</sub> prep | 10      | 2173  | [ <b>3-(SR')</b> <sub>2</sub> - C <sub>5</sub> H <sub>8</sub> O <sub>2</sub> S + H] <sup>+</sup>               | 820          | 2000         | <b>1500</b>       | <b>400</b>        | <b>0.26</b>        |
| <b>3-(SR')</b> <sub>2</sub> prep | 10      | 2305  | [ <b>3-(SR')</b> <sub>2</sub> + H] <sup>+</sup>                                                                | 4800         | 9200         | <b>7100</b>       | <b>1600</b>       | <b>0.23</b>        |

b) Structures of TPE<sub>2</sub> ions observed after esterification of **1** monolayer with HO<sub>2</sub>C(CH<sub>2</sub>)<sub>2</sub>SSR' /EDC / DMAP.

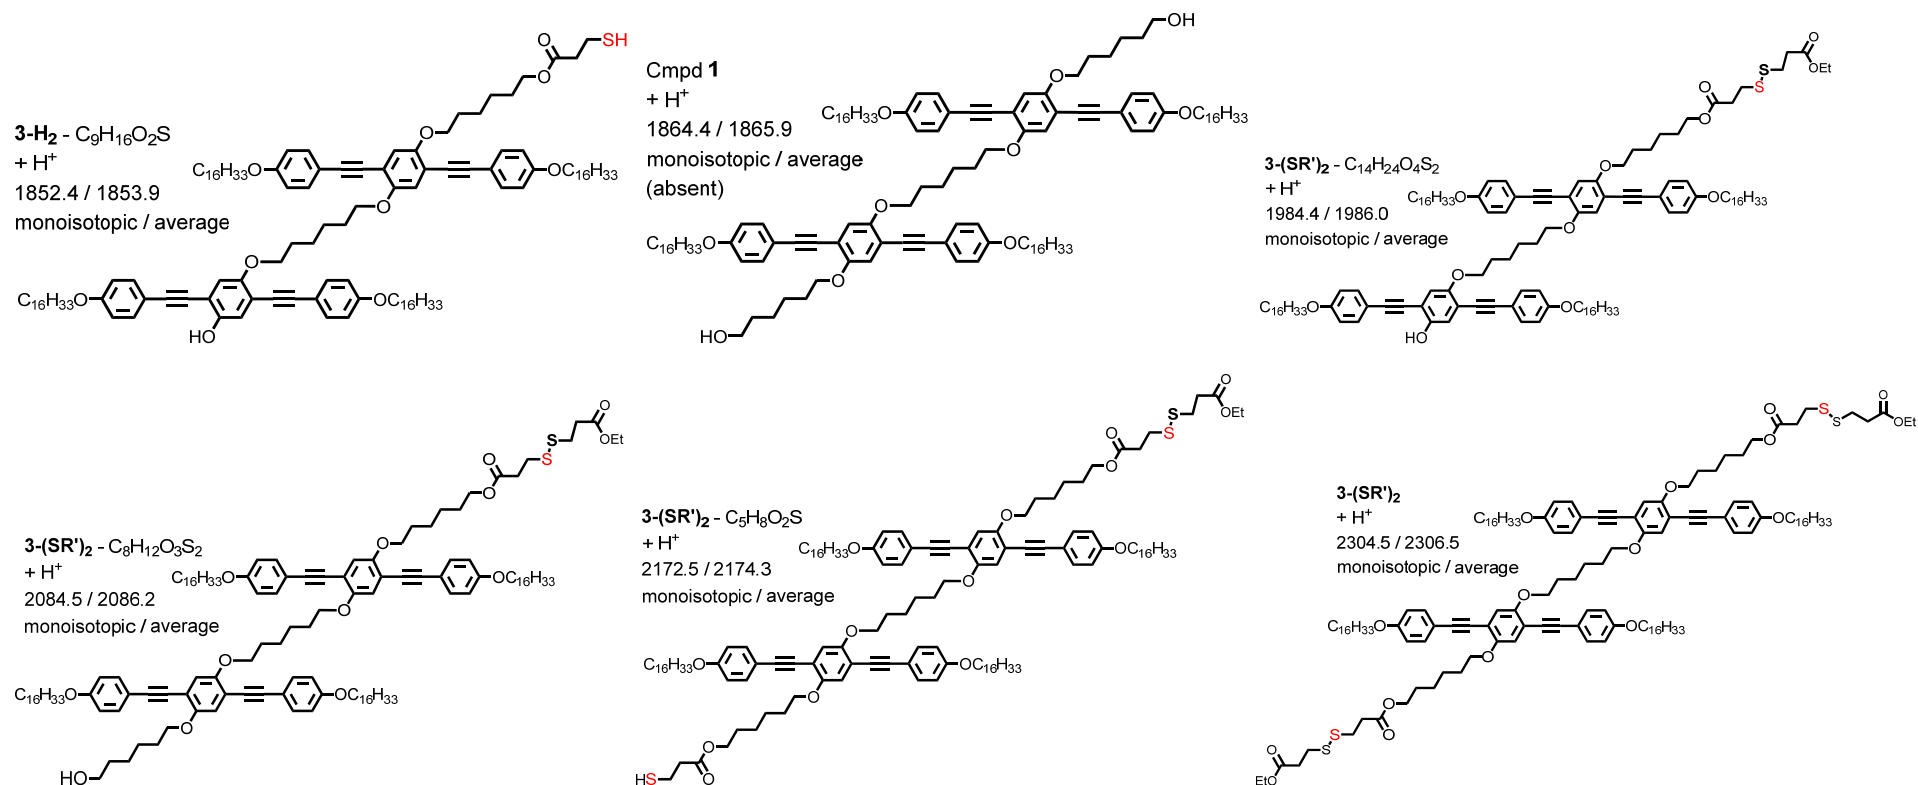



Supporting Information - Zipping and Unzipping Monolayers: Switchable Monolayer Oligomerization and Adhesion via Thiol - Disulfide Interconversion.

Jian He, Kyle J. Myerson and Matthew B. Zimmt

c) TOF mass spectra 0-2.5 kD region ( $3\text{-}(\text{SR}')_2$ ): 10 samples (1 trial), intensity (y) axis scale 0-90000.

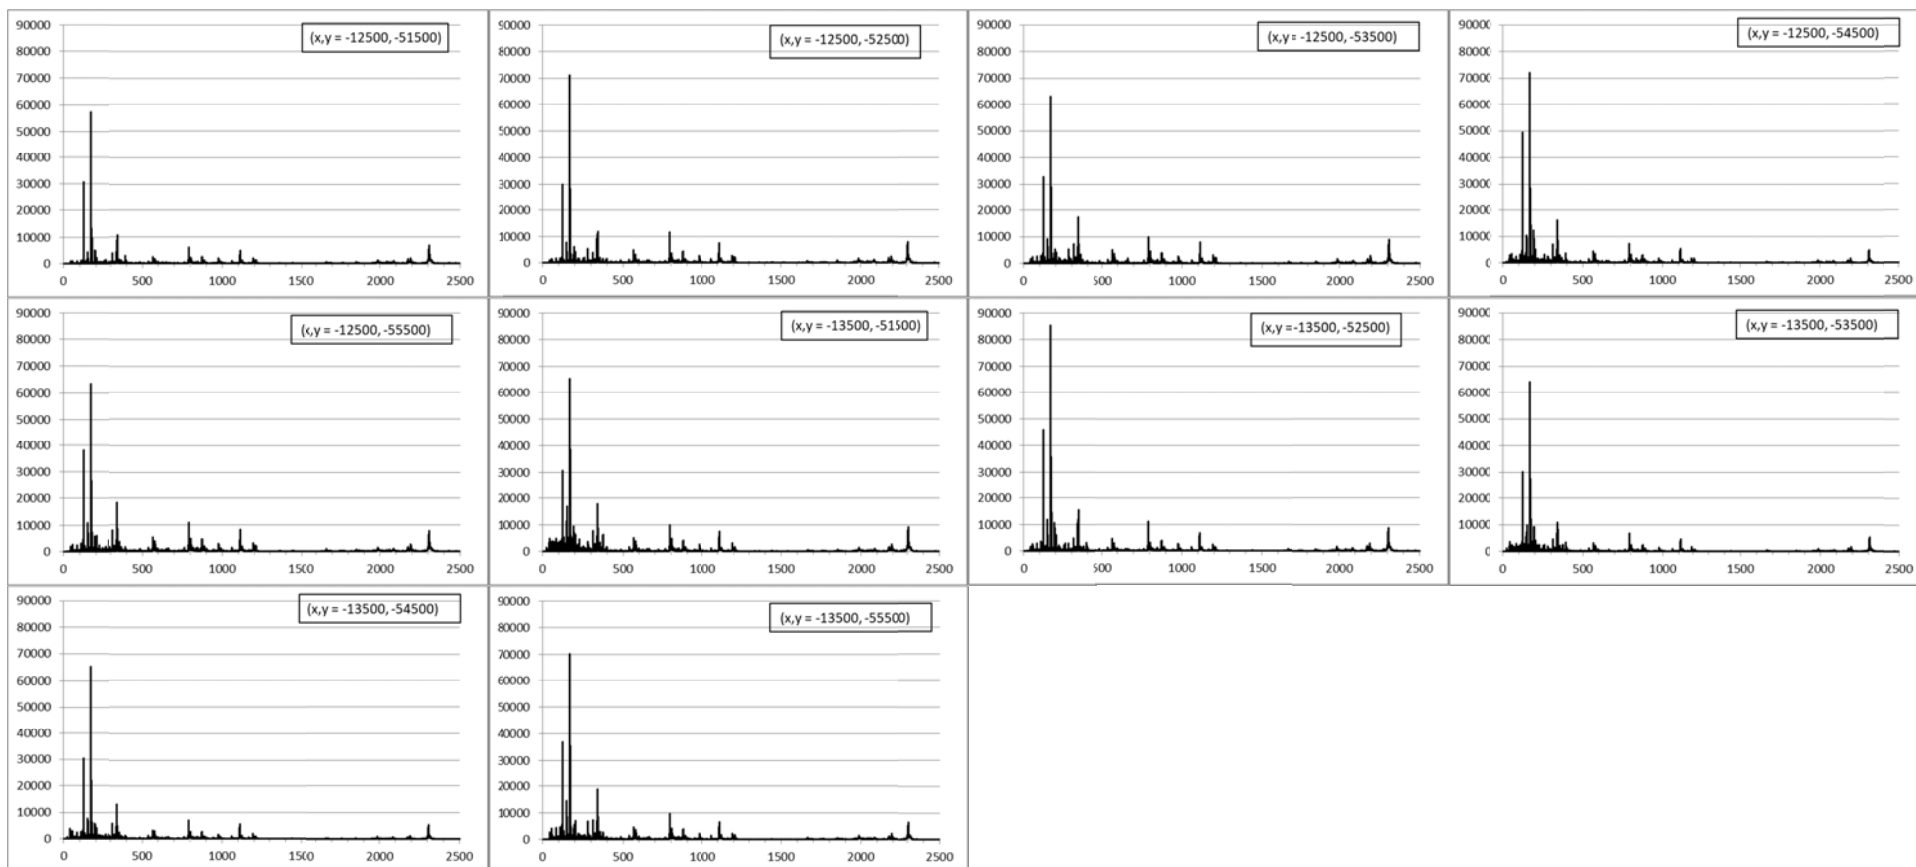

c) TOF mass spectra 1.8-2.6 kD region ( $3\text{-}(\text{SR}')_2$ ): 10 samples (1 trial), intensity (y) axis scale 0-15000.

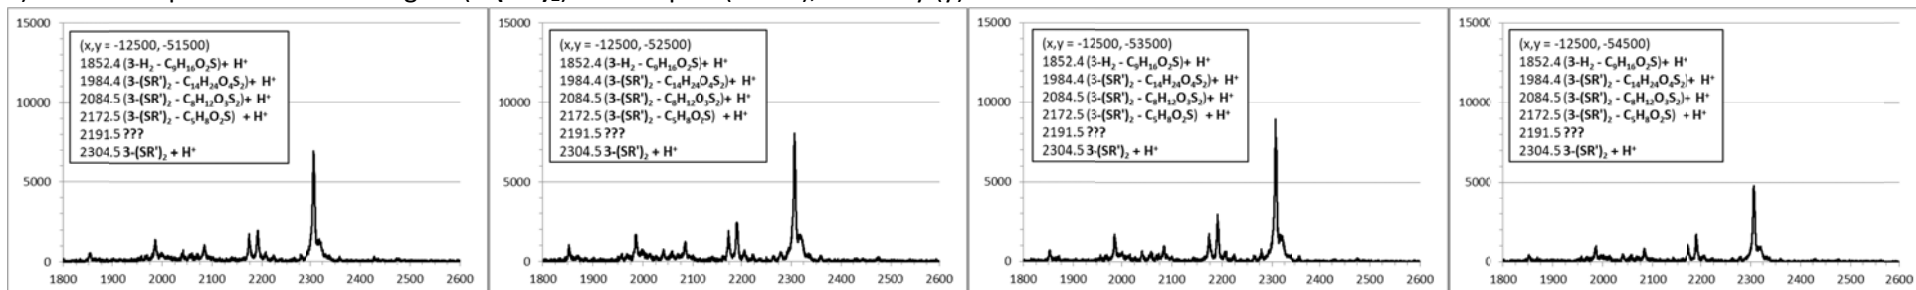

Supporting Information - Zipping and Unzipping Monolayers: Switchable Monolayer Oligomerization and Adhesion via Thiol - Disulfide Interconversion.

Jian He, Kyle J. Myerson and Matthew B. Zimmt

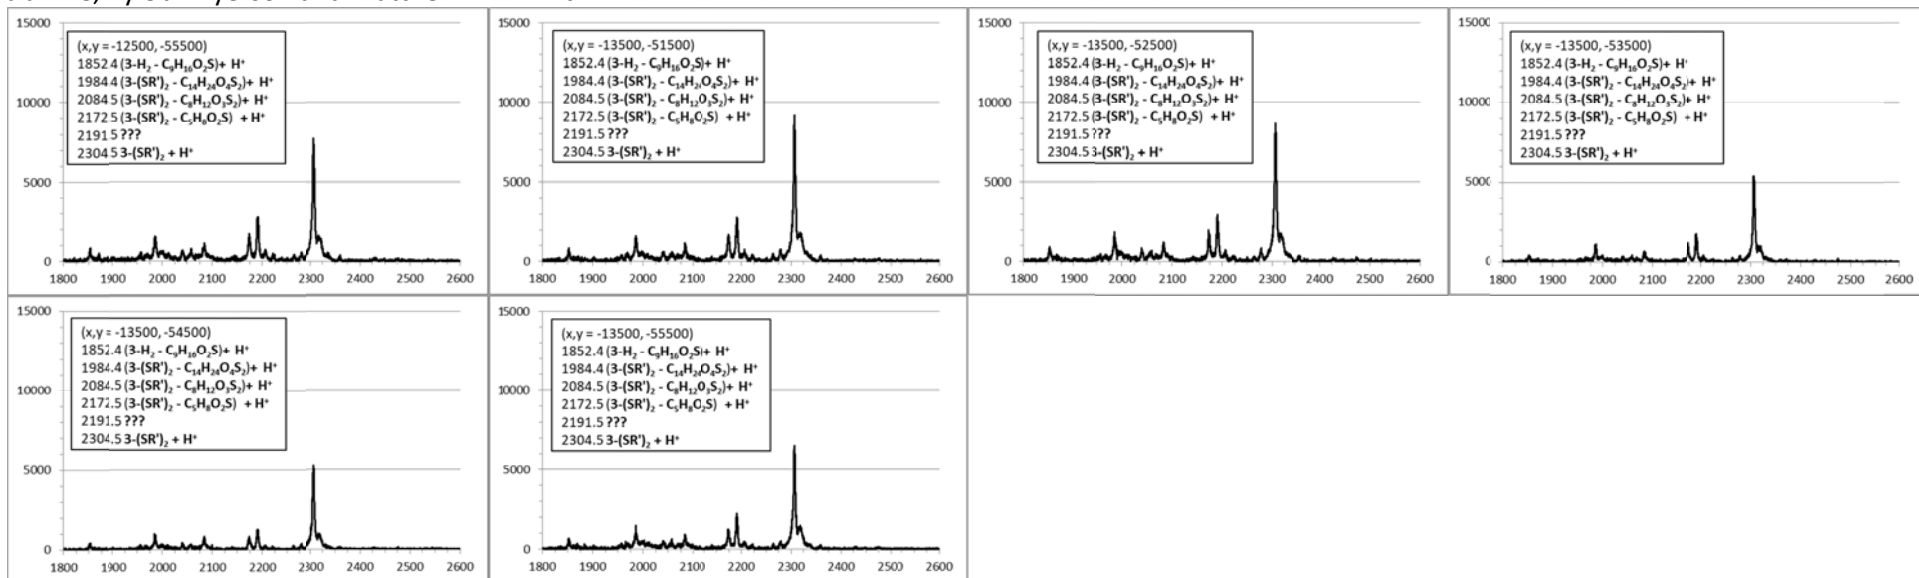

**(xiv) Fig. S11.** TOF mass spectra following in-situ reaction of monolayer **3-H<sub>2</sub>** with I<sub>2</sub> in DMF to form monolayer **(3)<sub>x</sub>**

TOF mass spectra 0-2.6 kD region and 1.8-2.6kD region (**3-H<sub>2</sub>** → **(3)<sub>x</sub>**): 3 samples

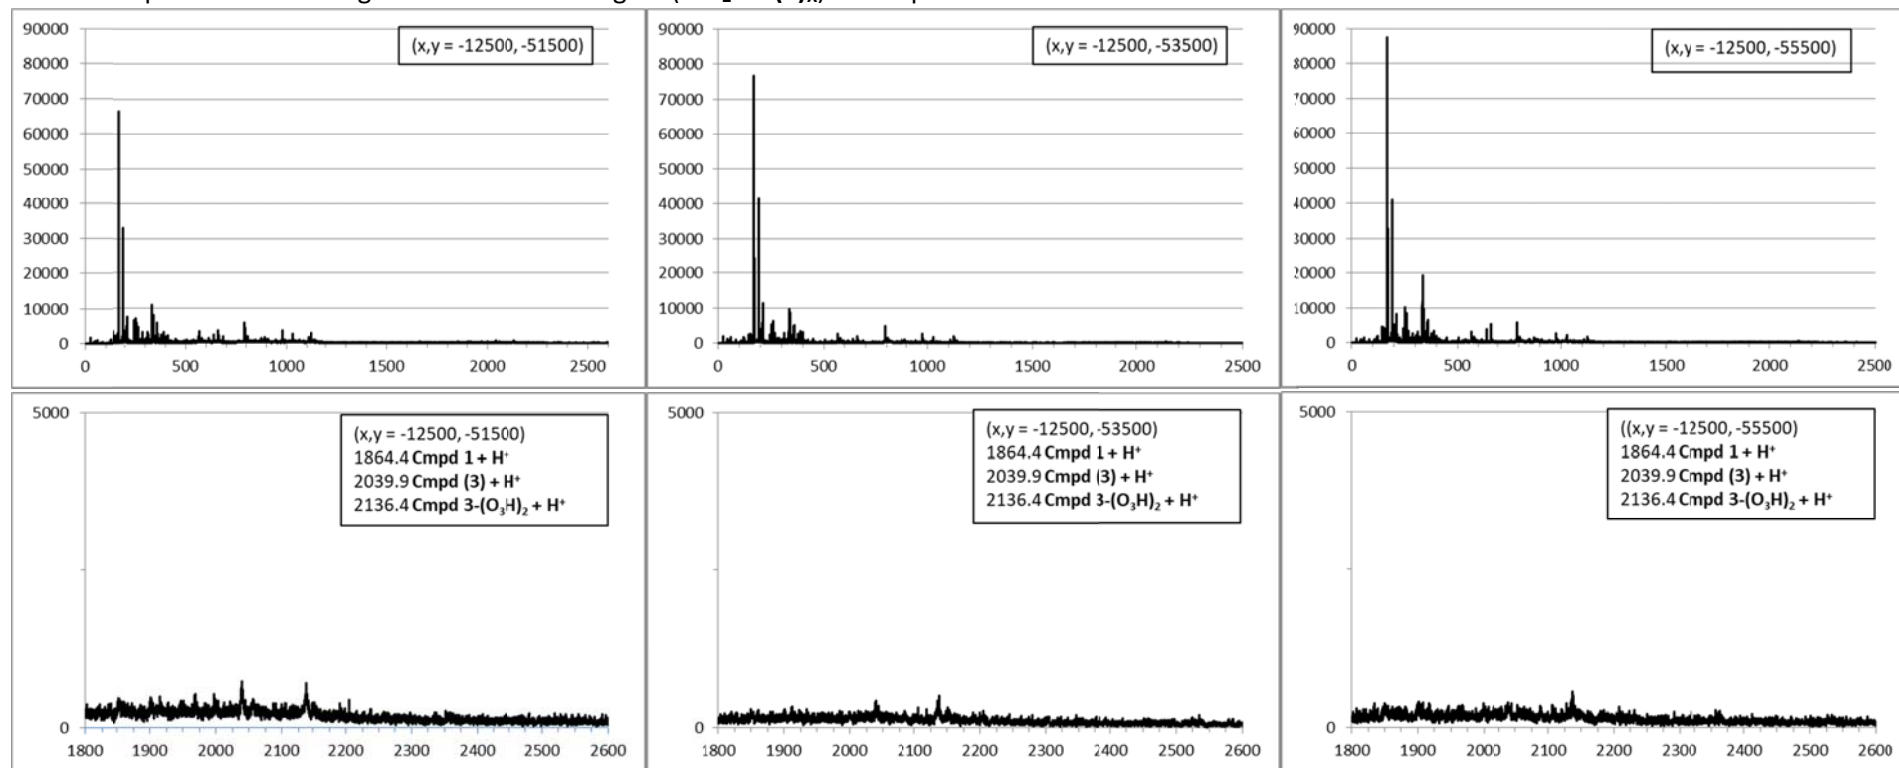

**(xv). Fig. S12.** TOF mass spectra of **3-H<sub>2</sub>** monolayer formed by treatment of **2a** monolayer with two (2) cycles of oxidation (I<sub>2</sub>) / reduction (DTT).

a) Summary and statistical analysis of mass spectra peak intensities.

| measurement              | samples | m/z   | assignment                                                | Int. minimum | Int. maximum | Intensity average | Intensity st.dev. | st.dev. / < Int. > |
|--------------------------|---------|-------|-----------------------------------------------------------|--------------|--------------|-------------------|-------------------|--------------------|
| 2a (ox/red) <sub>2</sub> | 10      | 169.3 | matrix ([THAP+H] <sup>+</sup> )                           | 73700        | 108000       | <b>92000</b>      | <b>11400</b>      | <b>0.12</b>        |
| 2a (ox/red) <sub>2</sub> | 10      | 2040  | [ <b>3-H<sub>2</sub></b> + H] <sup>+</sup>                | 2900         | 7100         | <b>4900</b>       | <b>1400</b>       | <b>0.29</b>        |
| 2a (ox/red) <sub>2</sub> | 10      | 2088  | [ <b>3-H(O<sub>3</sub>H)</b> + H] <sup>+</sup>            | 330          | 750          | <b>540</b>        | <b>170</b>        | <b>0.31</b>        |
| 2a (ox/red) <sub>2</sub> | 10      | 2136  | [ <b>3-(O<sub>3</sub>H)<sub>2</sub></b> + H] <sup>+</sup> | 140          | 410          | <b>250</b>        | <b>90</b>         | <b>0.36</b>        |

b) TOF mass spectra 0-2.5 kD region of **3-H<sub>2</sub>** monolayer: 10 samples (Intensity (y) axis scale 0-90000).

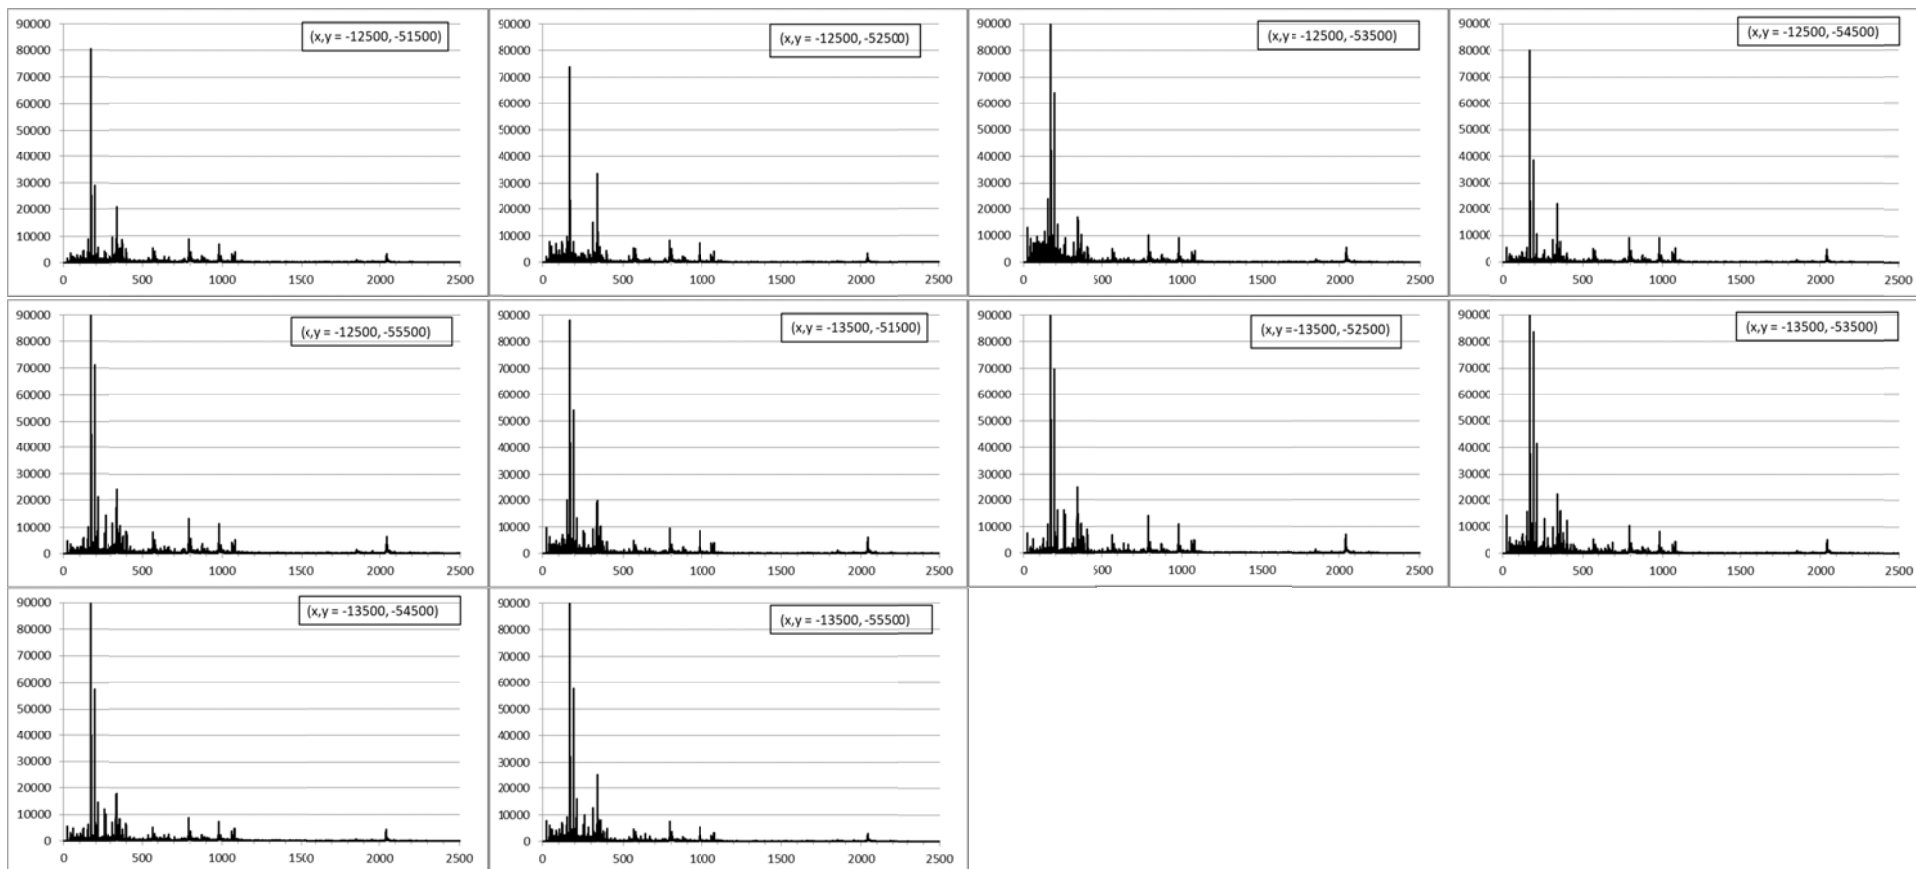

c) TOF mass spectra 1.8-2.6 kD region of **3-H<sub>2</sub>** monolayer after 2 ox/red cycles: 10 samples (Intensity (y) axis scale 0-10000).

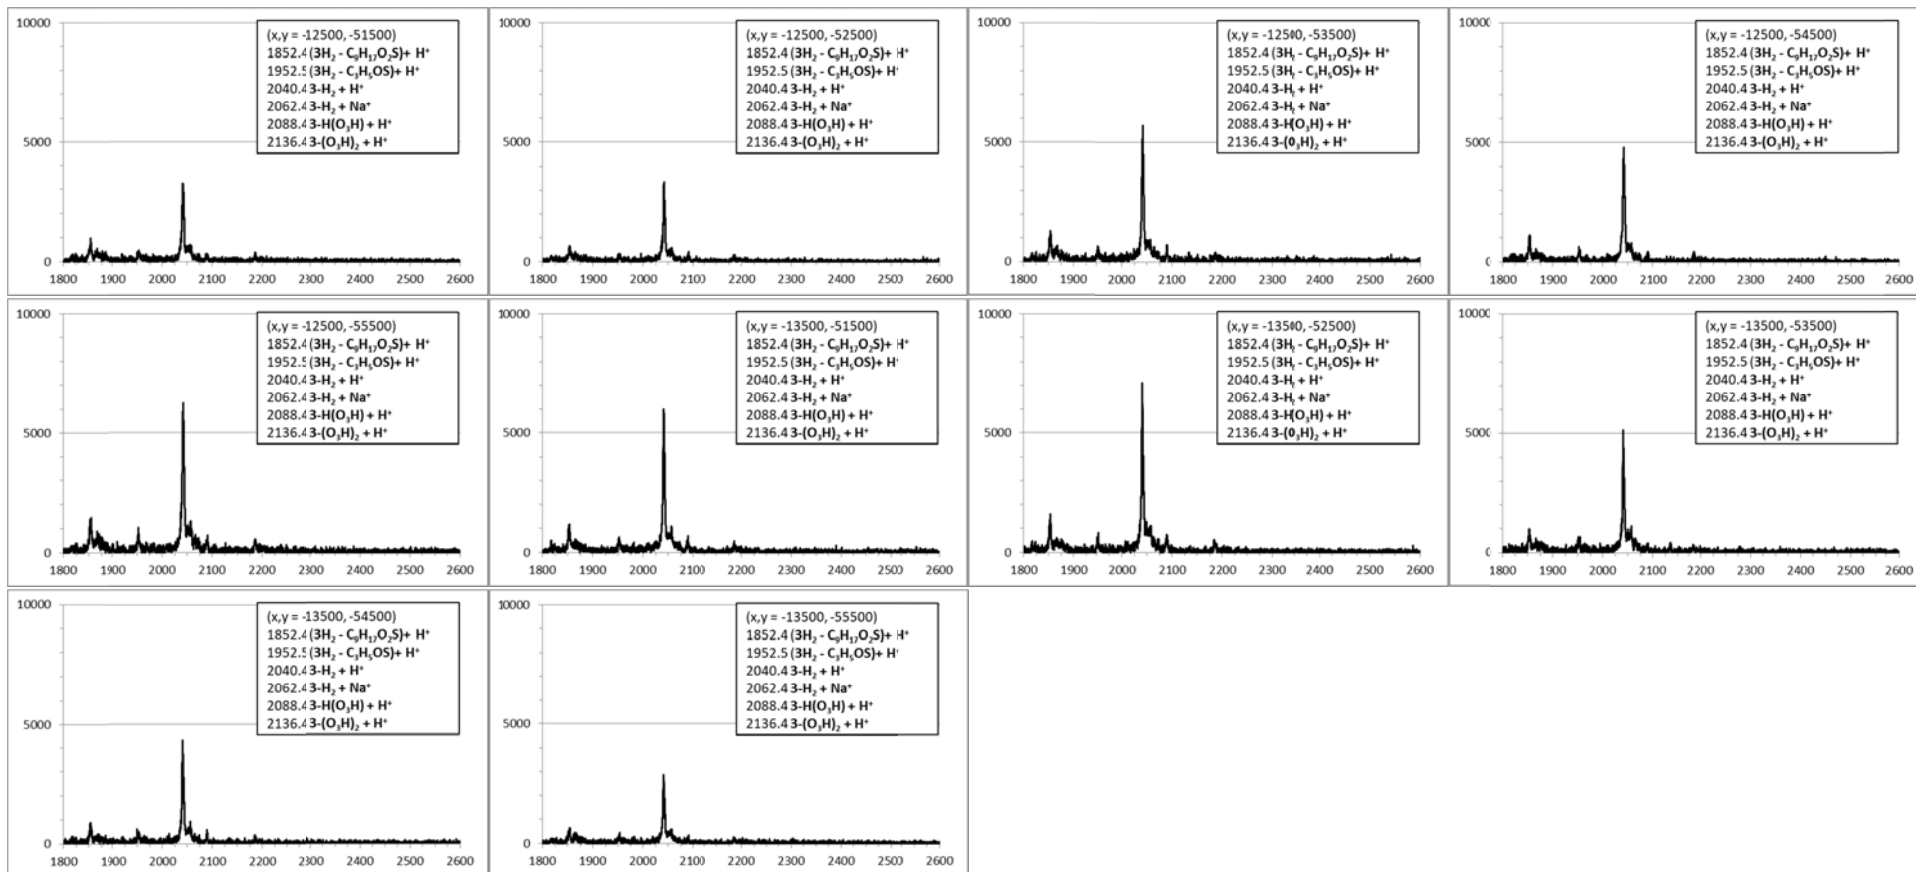

(xvi). **Fig. S13.** TOF mass spectra of **3-H<sub>2</sub>** monolayer formed by treatment of **2a** monolayer with three (3) cycles of oxidation (I<sub>2</sub>) / reduction (DTT).

a) Summary and statistical analysis of mass spectra peak intensities.

| measurement              | samples | m/z   | assignment                                                | Int. minimum | Int. maximum | Intensity average | Intensity st.dev. | st.dev. / < Int. > |
|--------------------------|---------|-------|-----------------------------------------------------------|--------------|--------------|-------------------|-------------------|--------------------|
| 2a (ox/red) <sub>3</sub> | 10      | 169.3 | matrix ([THAP+H] <sup>+</sup> )                           | 65800        | 107000       | <b>89500</b>      | <b>15800</b>      | <b>0.18</b>        |
| 2a (ox/red) <sub>3</sub> | 10      | 2040  | [ <b>3-H<sub>2</sub></b> + H] <sup>+</sup>                | 1970         | 3900         | <b>2720</b>       | <b>670</b>        | <b>0.25</b>        |
| 2a (ox/red) <sub>3</sub> | 10      | 2088  | [ <b>3-H(O<sub>3</sub>H)</b> + H] <sup>+</sup>            | 330          | 530          | <b>430</b>        | <b>70</b>         | <b>0.15</b>        |
| 2a (ox/red) <sub>3</sub> | 10      | 2136  | [ <b>3-(O<sub>3</sub>H)<sub>2</sub></b> + H] <sup>+</sup> | 380          | 900          | <b>570</b>        | <b>190</b>        | <b>0.33</b>        |

b) TOF mass spectra 0-2.5 kD region of **3-H<sub>2</sub>** monolayer after 3 ox/red cycles: 10 samples (Intensity (y) axis scale 0-90000).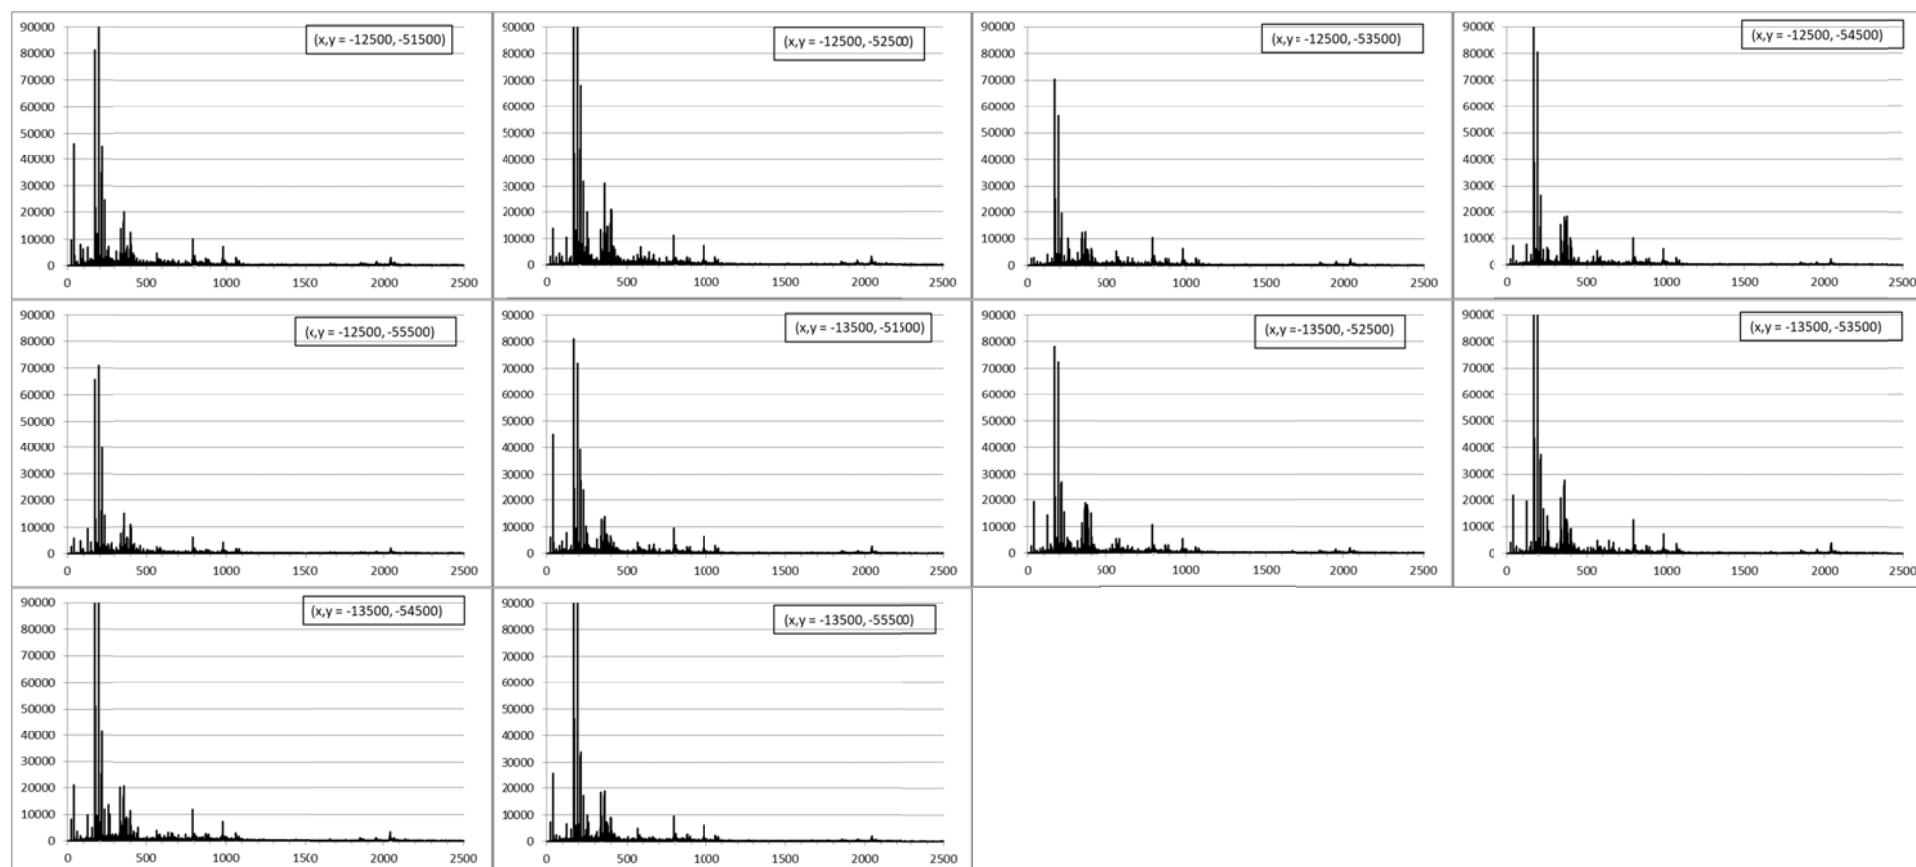

Supporting Information - Zipping and Unzipping Monolayers: Switchable Monolayer Oligomerization and Adhesion via Thiol - Disulfide Interconversion.  
 Jian He, Kyle J. Myerson and Matthew B. Zimmt

c) TOF mass spectra 1.8-2.6 kD region of **3-H<sub>2</sub>** monolayer after 3 ox/red cycles: 10 samples (Intensity (y) axis scale 0-10000).

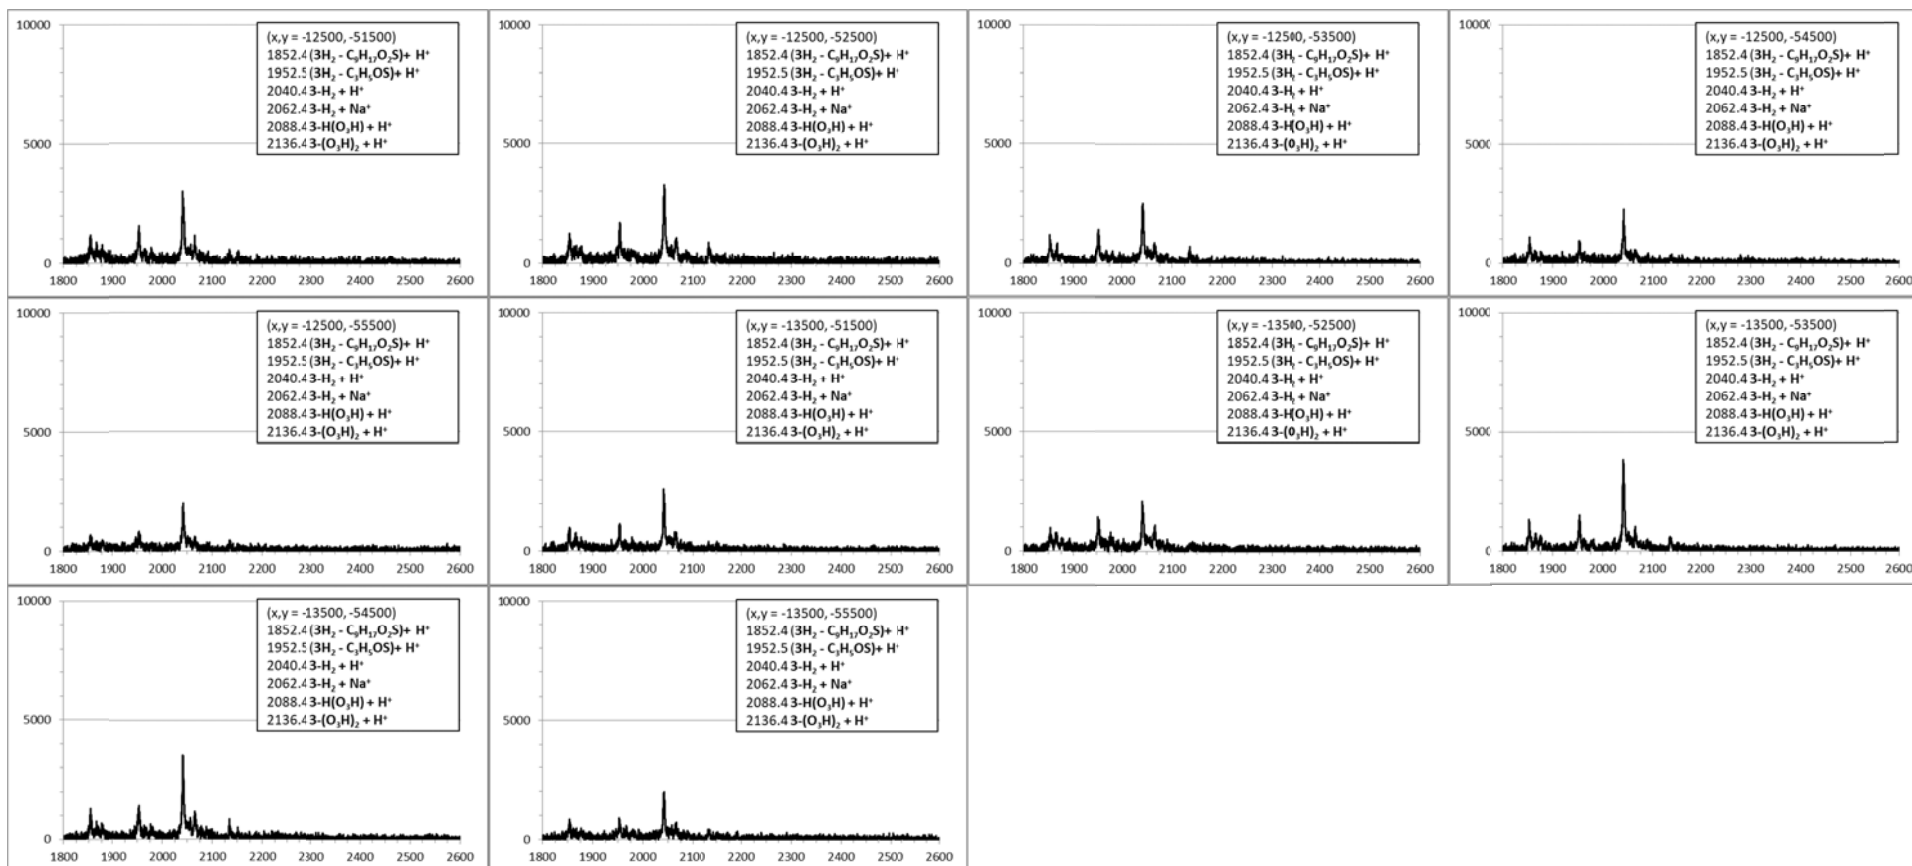

| Ox / Red Cycles | <THAP> | < [ 3-H <sub>2</sub> + H <sup>+</sup> ] > | < [ 3-H(O <sub>3</sub> H) + H <sup>+</sup> ] > | < [ 3- (O <sub>3</sub> H) <sub>2</sub> + H <sup>+</sup> ] > |
|-----------------|--------|-------------------------------------------|------------------------------------------------|-------------------------------------------------------------|
| 1               | 87400  | 9100                                      | 550                                            | 440                                                         |
| 2               | 92000  | 4900                                      | 540                                            | 250                                                         |
| 3               | 89500  | 2720                                      | 430                                            | 570                                                         |

(xvii) **Fig. S14.** Single core molecule **TPE-4** structure, monolayer STM image and resistance to o-dichlorobenzene (oDCB) rinsing determined by laser desorption and ionization (LDI) TOF mass spectroscopy.

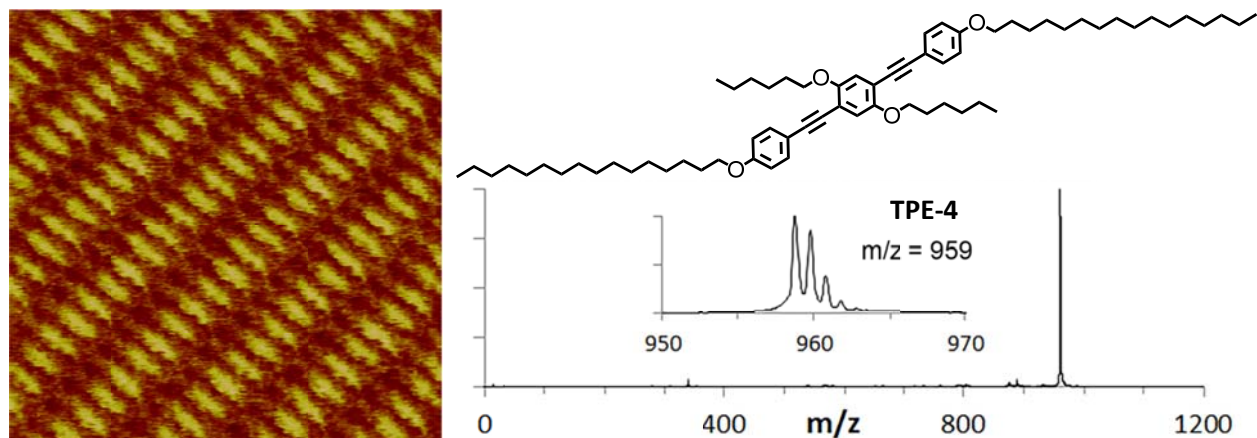

STM scan: 20nm x 20 nm

a) Summary and statistical analysis of mass spectra peak intensity prior and after 20 $\mu$ L oDCB rinse of **TPE-4** monolayer.

| <u>measurement</u> | <u>samples</u> | <u>m/ z</u> | <u>assignment</u>             | <u>Int. minimum</u> | <u>Int. maximum</u> | <u>Intensity average</u> | <u>Intensity st.dev.</u> | <u>st.dev. / &lt; Int. &gt;</u> |
|--------------------|----------------|-------------|-------------------------------|---------------------|---------------------|--------------------------|--------------------------|---------------------------------|
| Before rinse       | 10             | 958.5       | [ <b>TPE-4</b> ] <sup>+</sup> | 56500               | 111000              | <b>93200 (1.00)</b>      | 17600                    | 0.19                            |
| After 20 $\mu$ L   | 10             | 958.5       | [ <b>TPE-4</b> ] <sup>+</sup> | 490                 | 1500                | <b>970 (0.01)</b>        | 390                      | 0.41                            |



b) LDI-TOF mass spectra of **TPE-4** monolayer prior to oDCB rinse: 10 sampled spots. 0-2.5 kD region and 0.9-1.0 kD region of the average spectrum collected from five spots at x = -12500 and at x = -13500 (Intensity (y) axis scale 0 - 120000)

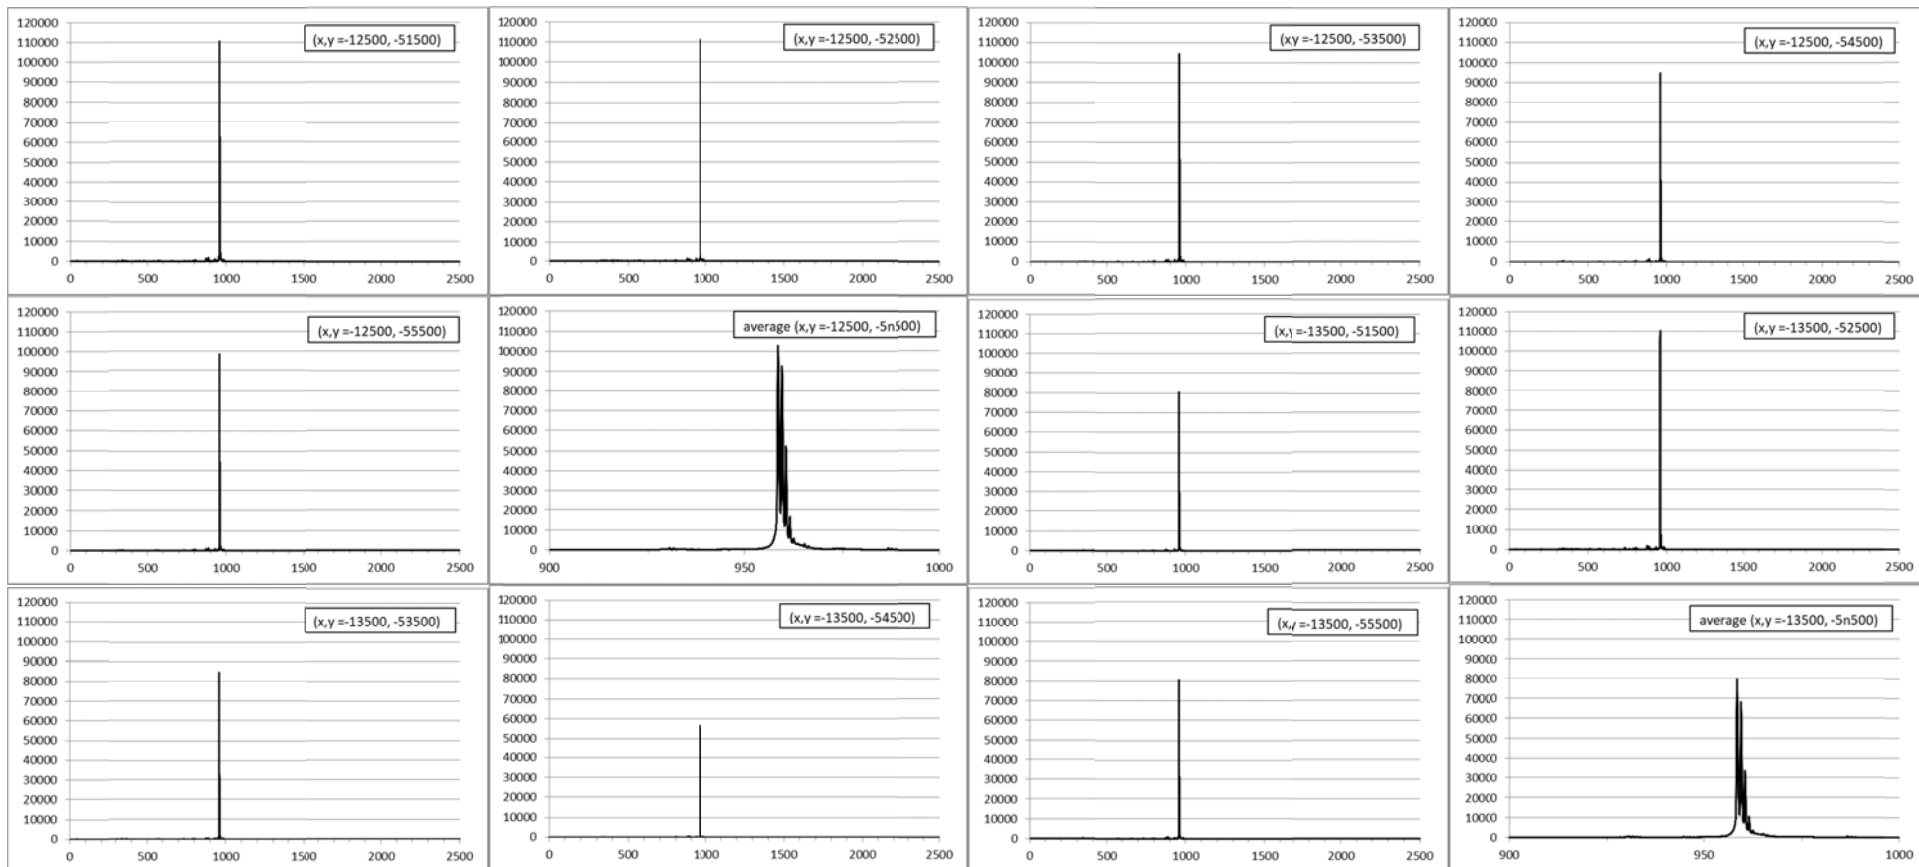

c) LDI-TOF mass spectra of **TPE-4** monolayer after 20 $\mu$ L oDCB rinse: 10 sampled spots. 0-2.5 kD region and 0.9-1.0 kD region of the average spectrum collected from five spots at x = -12500 and at x = -13500 (Intensity (y) axis scale 0 - 1600)

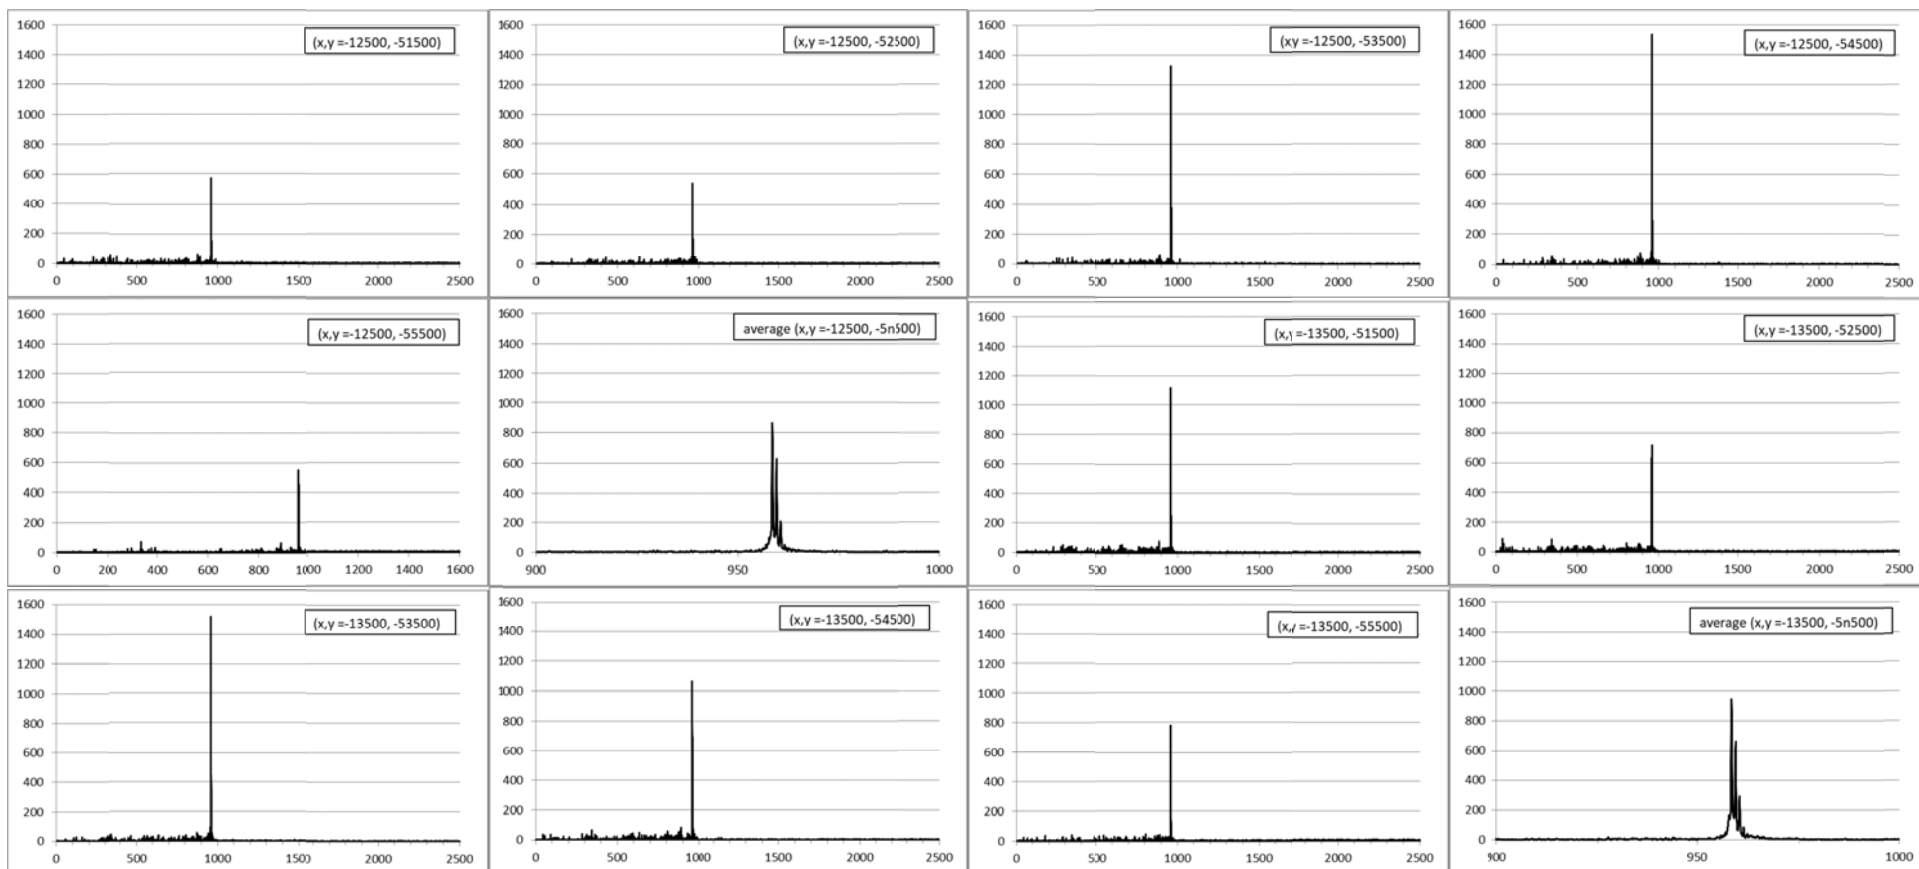

(xviii) Fig. S15. Resistance of TPE<sub>2</sub> monolayer **1** to incubation in oDCB determined by mass spectra.

a) Summary and statistical analysis of mass spectra peak intensity prior to, after 3 hr and after 18 hr incubation in oDCB at 19°C.

| measurement   | samples | m/z   | assignment                      | Int. minimum | Int. maximum | Intensity average   | Intensity st.dev. | st.dev. / < Int. > |
|---------------|---------|-------|---------------------------------|--------------|--------------|---------------------|-------------------|--------------------|
| Before        | 10      | 169.3 | matrix ([THAP+H] <sup>+</sup> ) | 57600        | 79600        | 67200               | 8500              | 0.13               |
| 3 hr in oDCB  | 10      | 169.3 | matrix ([THAP+H] <sup>+</sup> ) | 32100        | 59000        | 45500               | 7700              | 0.17               |
| 18 hr in oDCB | 10      | 169.3 | matrix ([THAP+H] <sup>+</sup> ) | 61100        | 80700        | 70700               | 6000              | 0.08               |
| Before        | 10      | 1864  | [ <b>1</b> + H] <sup>+</sup>    | 20400        | 59300        | <b>39000 (1.00)</b> | 11700             | 0.30               |
| 3 hr in oDCB  | 10      | 1864  | [ <b>1</b> + H] <sup>+</sup>    | 6200         | 18700        | <b>10300 (0.26)</b> | 3700              | 0.36               |
| 18 hr in oDCB | 10      | 1864  | [ <b>1</b> + H] <sup>+</sup>    | 1500         | 4900         | <b>2400 (0.06)</b>  | 1000              | 0.42               |

b) **1** Monolayer on HOPG - prior to oDCB incubation: 10 sampled spots. 0-2.5kD region and 1.7-2.5 kD region of the average spectrum collected from five spots at x = -12500 and at x = -13500 (Intensity (y) axis scale 0-90000; 0-50000 for the averaged spectra).

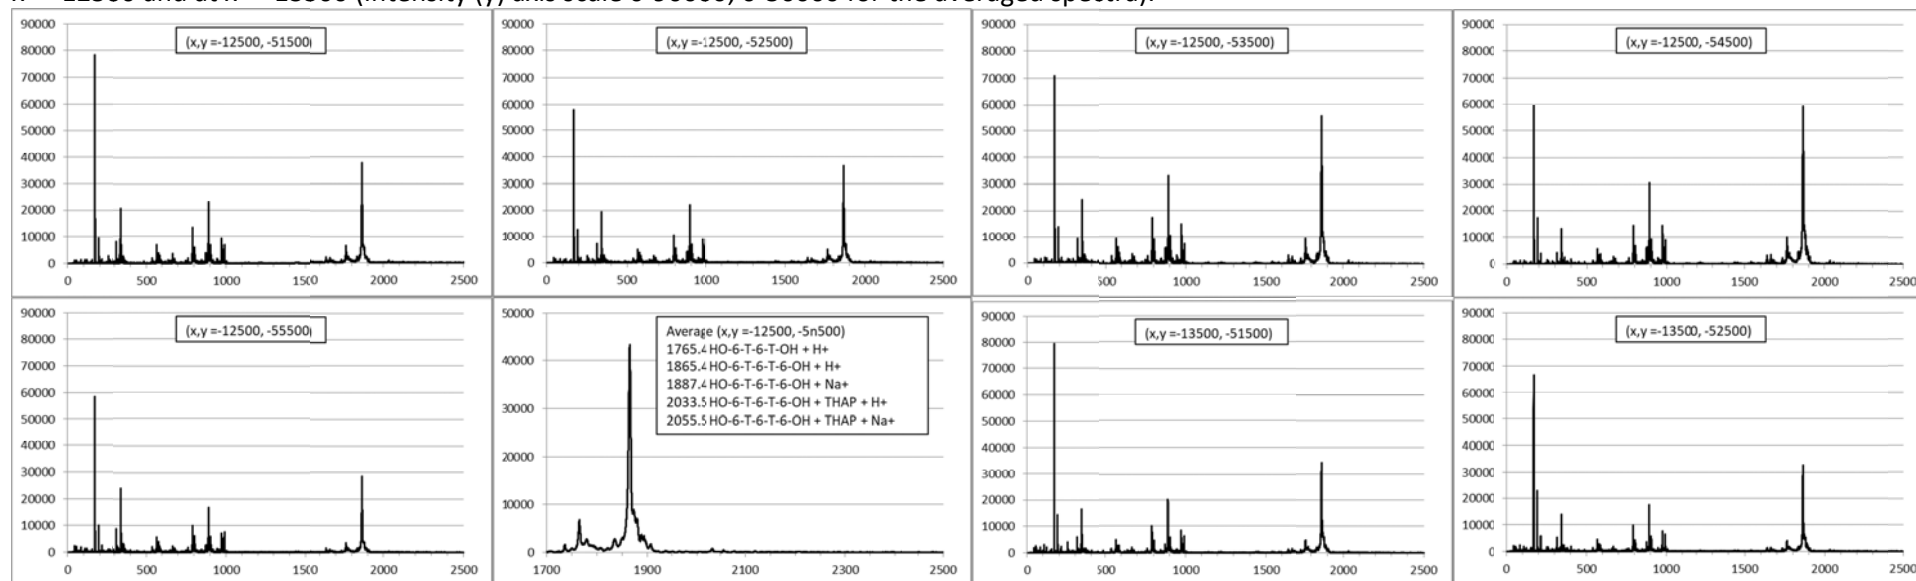

Supporting Information - Zipping and Unzipping Monolayers: Switchable Monolayer Oligomerization and Adhesion via Thiol - Disulfide Interconversion.  
 Jian He, Kyle J. Myerson and Matthew B. Zimmt

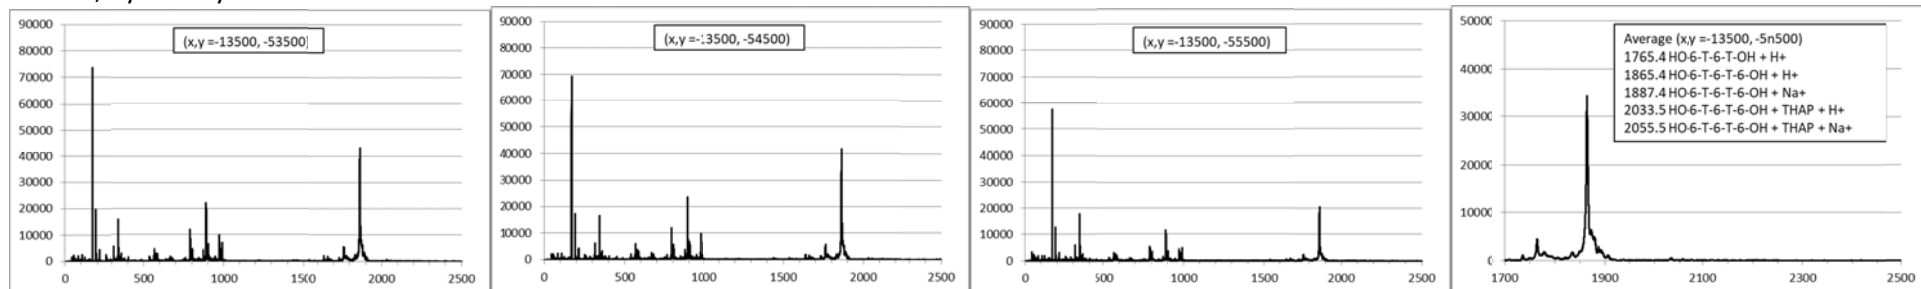

c) **1** Monolayer on HOPG after 3 hr oDCB incubation: 10 sampled spots. 0-2.5kD region and 1.7-2.5 kD region of the average spectrum collected from five spots at x = -12500 and x = -13500 (Intensity (y) axis scale 0-90000; 0-50000 for the averaged spectra).

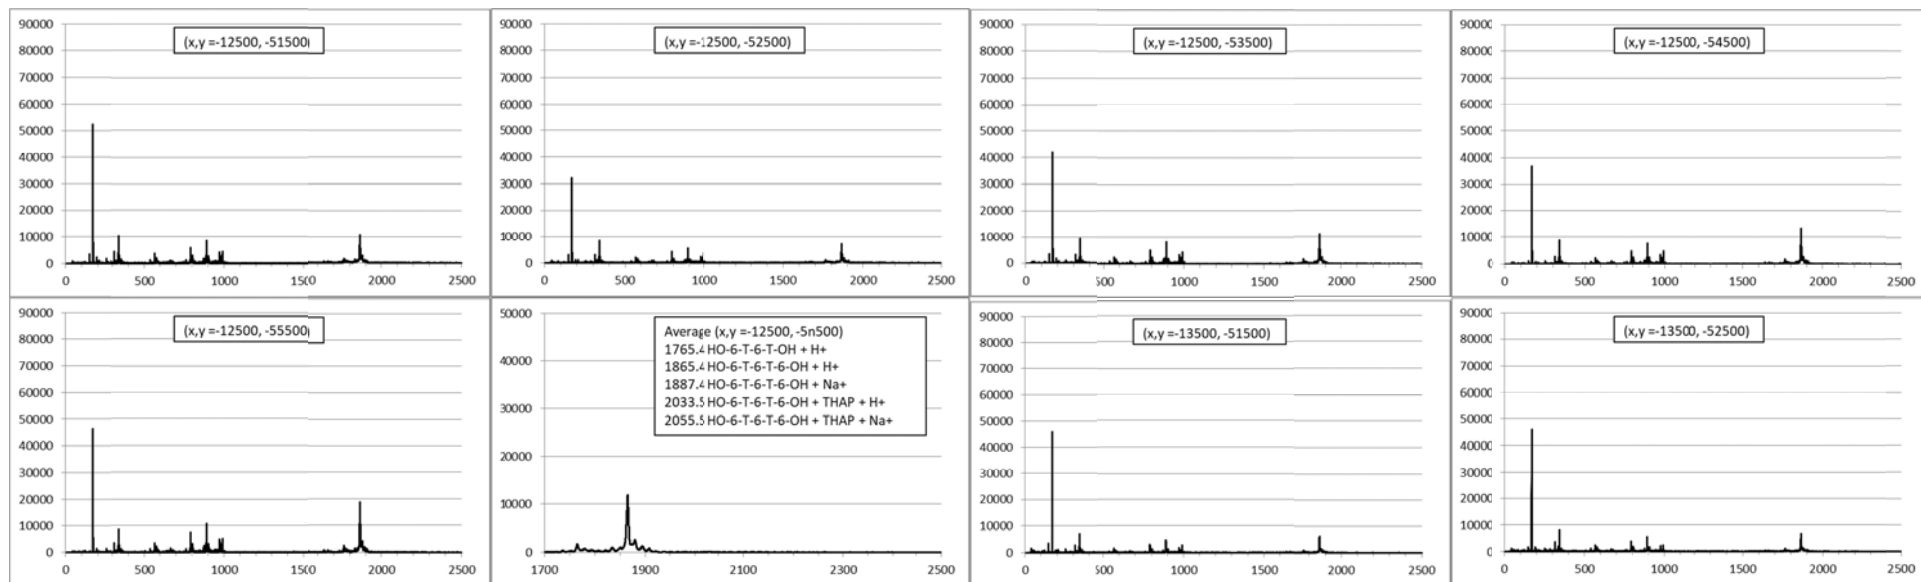

Supporting Information - Zipping and Unzipping Monolayers: Switchable Monolayer Oligomerization and Adhesion via Thiol - Disulfide Interconversion.  
 Jian He, Kyle J. Myerson and Matthew B. Zimmt

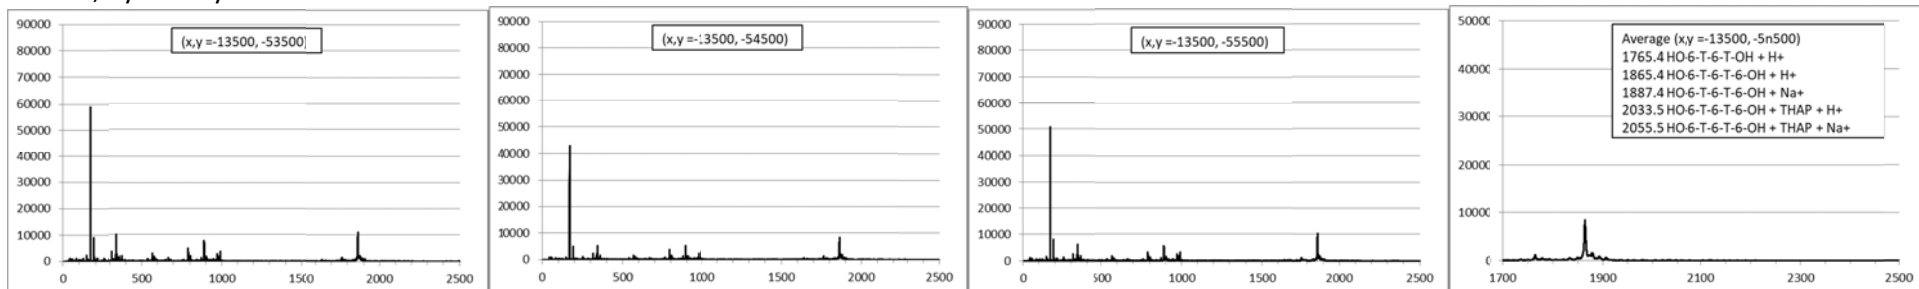

d) **1** Monolayer on HOPG after 18 hr oDCB incubation: 10 sampled spots. 0-2.5kD region and 1.7-2.5 kD region of the average spectrum collected from five spots at x = -12500 and x = -13500 (Intensity (y) axis scale 0-90000; 0-50000 for the averaged spectra).

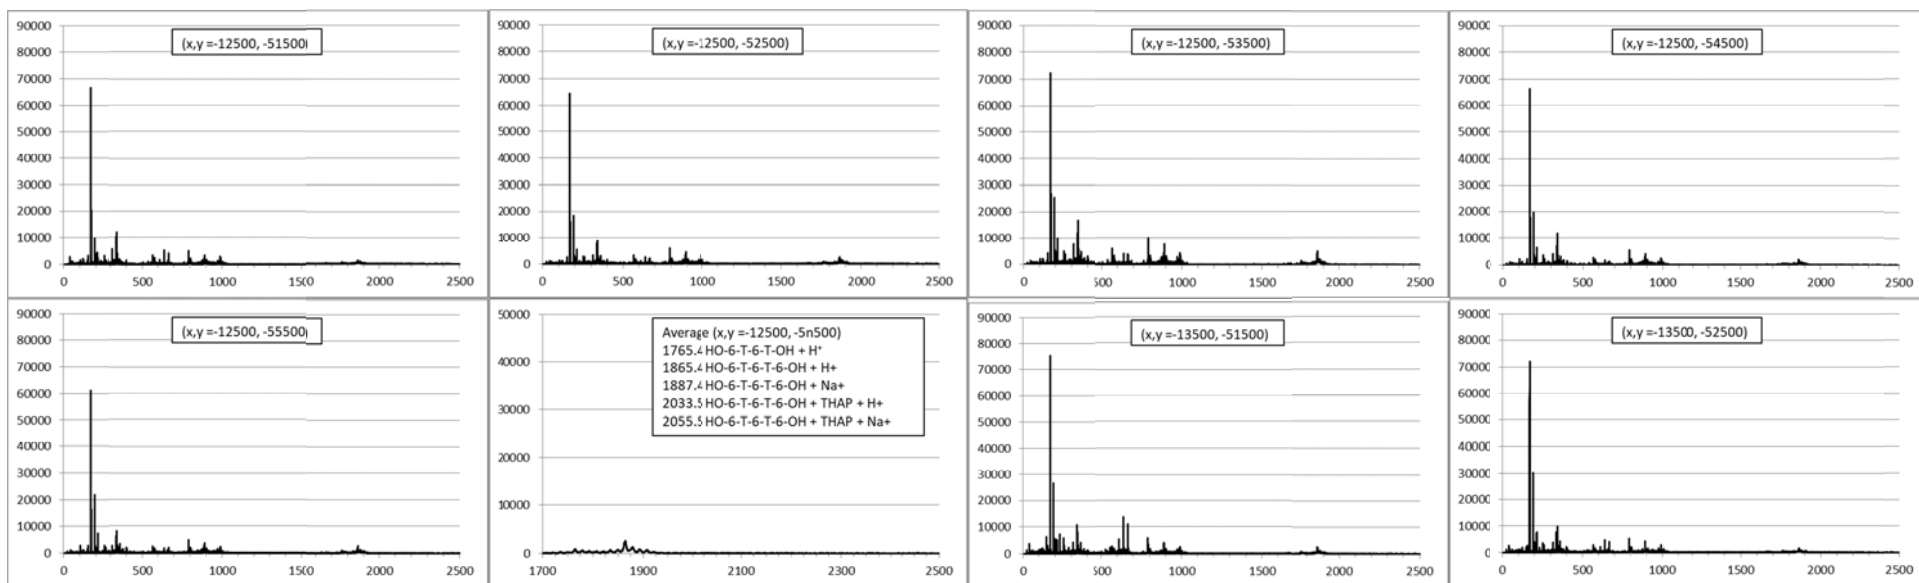

# Supporting Information - Zipping and Unzipping Monolayers: Switchable Monolayer Oligomerization and Adhesion via Thiol - Disulfide Interconversion.

Jian He, Kyle J. Myerson and Matthew B. Zimmt

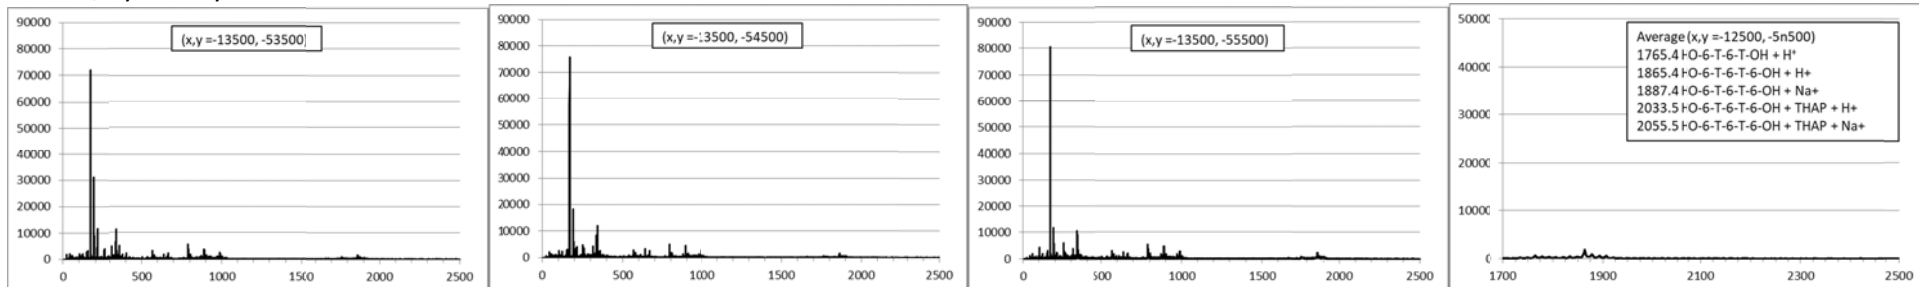

**(xix) Fig. S16.** Resistance of **(3)<sub>x</sub>** monolayer to 19°C and 60°C oDCB evaluated as the TOF MS intensity after reduction to **3-H<sub>2</sub>**.

a) Summary and statistics of mass spectra peak intensity prior to, after 20 hr incubation at 19°C in oDCB and after 21 hr incubation at 60°C in oDCB.

| measurement     | samples | m/z   | assignment                                 | Int. minimum | Int. maximum | Intensity average   | Intensity st.dev. | st.dev. / < Int. > |
|-----------------|---------|-------|--------------------------------------------|--------------|--------------|---------------------|-------------------|--------------------|
| Before          | 20      | 169.3 | matrix ([THAP+H] <sup>+</sup> )            | 50800        | 102000       | 84700               | 13400             | 0.16               |
| 20 hr 19°C oDCB | 10      | 169.3 | matrix ([THAP+H] <sup>+</sup> )            | 67600        | 107000       | 81700               | 13500             | 0.17               |
| 21 hr 60°C oDCB | 10      | 169.3 | matrix ([THAP+H] <sup>+</sup> )            | 81400        | 115000       | 96900               | 9800              | 0.10               |
| Before          | 20      | 2040  | [ <b>3-H<sub>2</sub></b> + H] <sup>+</sup> | 5600         | 14700        | <b>10200 (1.00)</b> | 2300              | 0.23               |
| 20 hr 19°C oDCB | 10      | 2040  | [ <b>3-H<sub>2</sub></b> + H] <sup>+</sup> | 5800         | 14200        | <b>9400 (0.92)</b>  | 2800              | 0.29               |
| 21 hr 60°C oDCB | 10      | 2040  | [ <b>3-H<sub>2</sub></b> + H] <sup>+</sup> | 6400         | 9700         | <b>8400 (0.82)</b>  | 1300              | 0.15               |

b) Freshly prepared **3-H<sub>2</sub>** monolayer on HOPG without oDCB incubation of **(3)<sub>x</sub>** precursor: 20 sampled spots. 0-2.5kD region and 1.8-2.6 kD region of the average spectrum collected from five spots at x = -12500 and at x = -13500 from two sides of HOPG (Intensity (y) axis scale 0-90000; 0-15000 for the averaged spectra).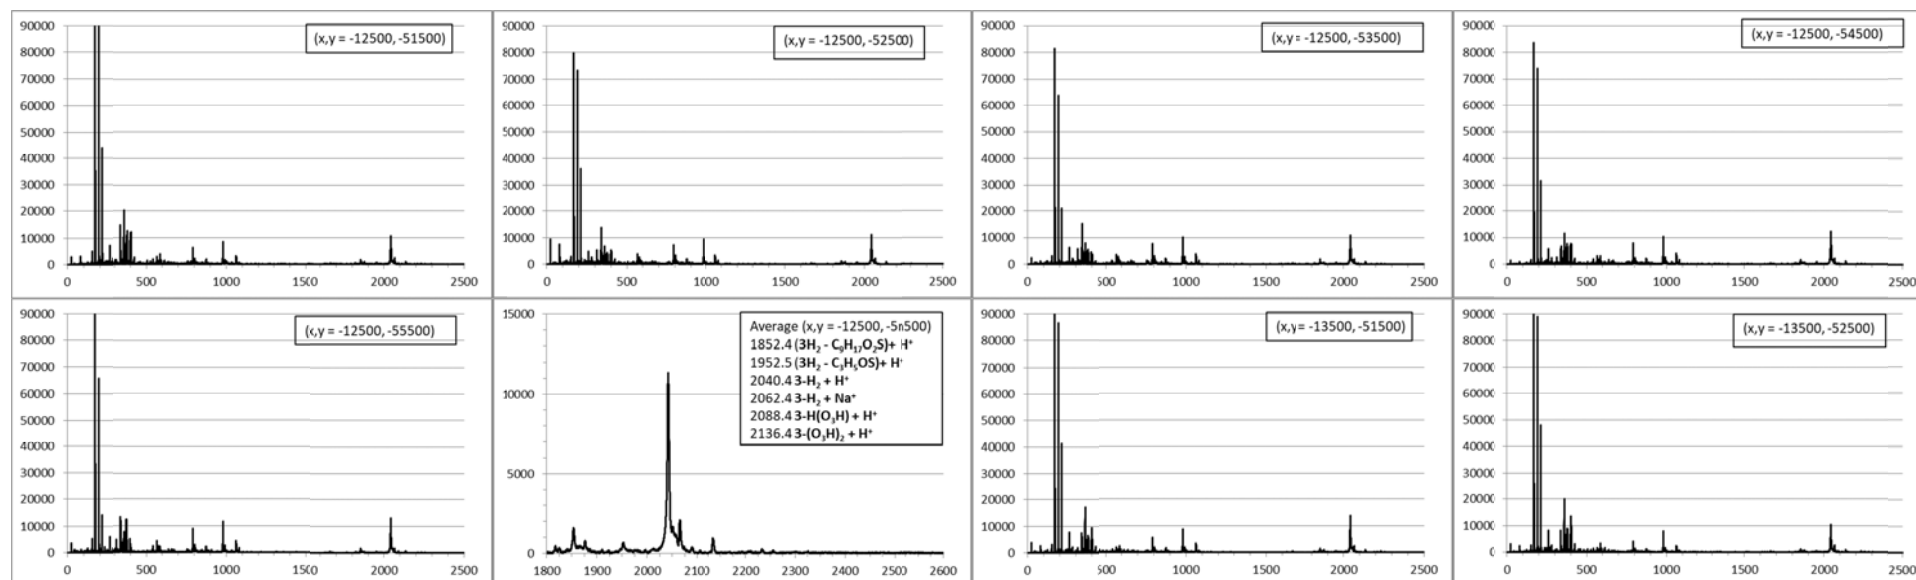

Supporting Information - Zipping and Unzipping Monolayers: Switchable Monolayer Oligomerization and Adhesion via Thiol - Disulfide Interconversion.

Jian He, Kyle J. Myerson and Matthew B. Zimmt

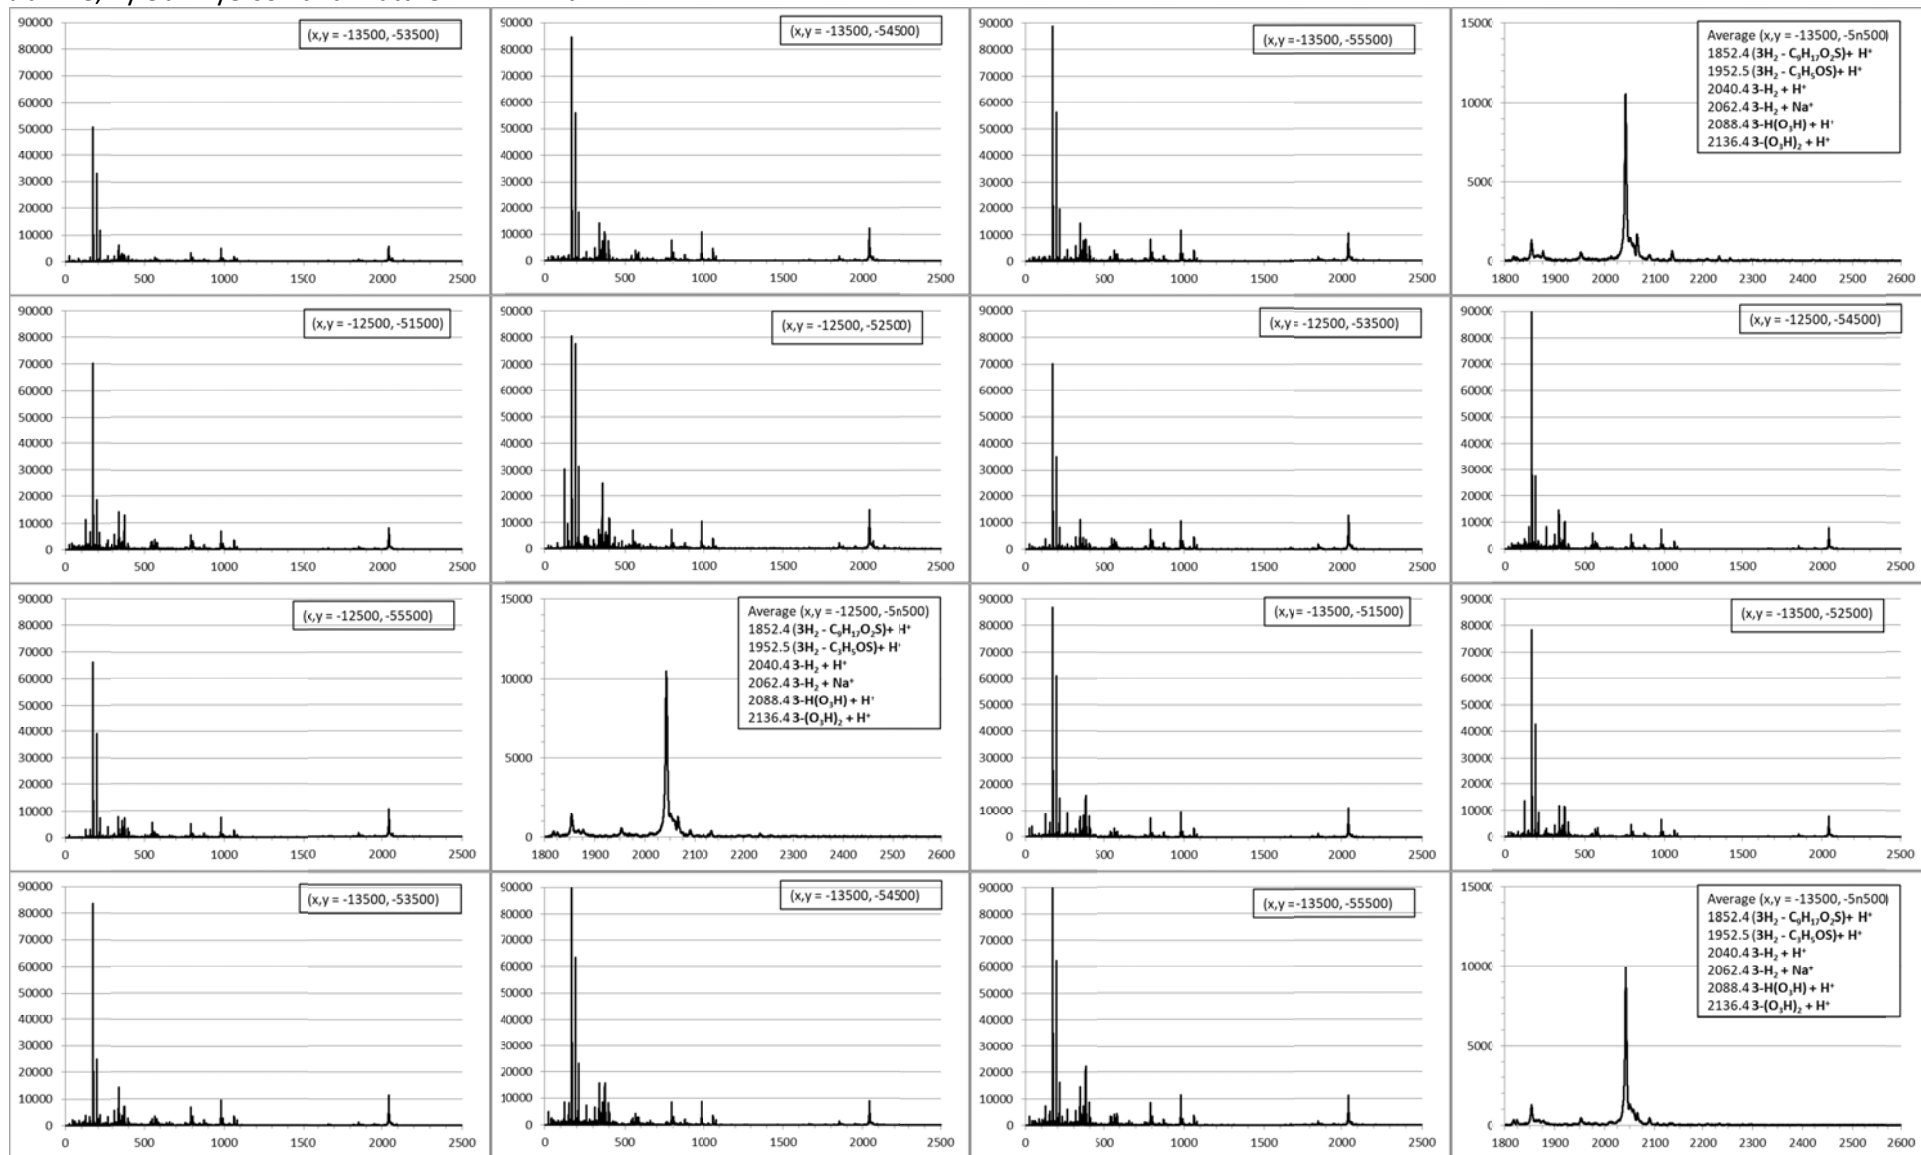



c) **3-H<sub>2</sub>** monolayer on HOPG prepared by DTT reduction after (**3**)<sub>x</sub> monolayer incubation for 20 hours in 19°C oDCB: 10 sampled spots. 0-2.5kD region and 1.8-2.6 kD region of the average spectrum collected from five spots at x = -12500 and at x = -13500 (Intensity (y) axis scale 0-90000; 0 - 15000 for the averaged spectra).

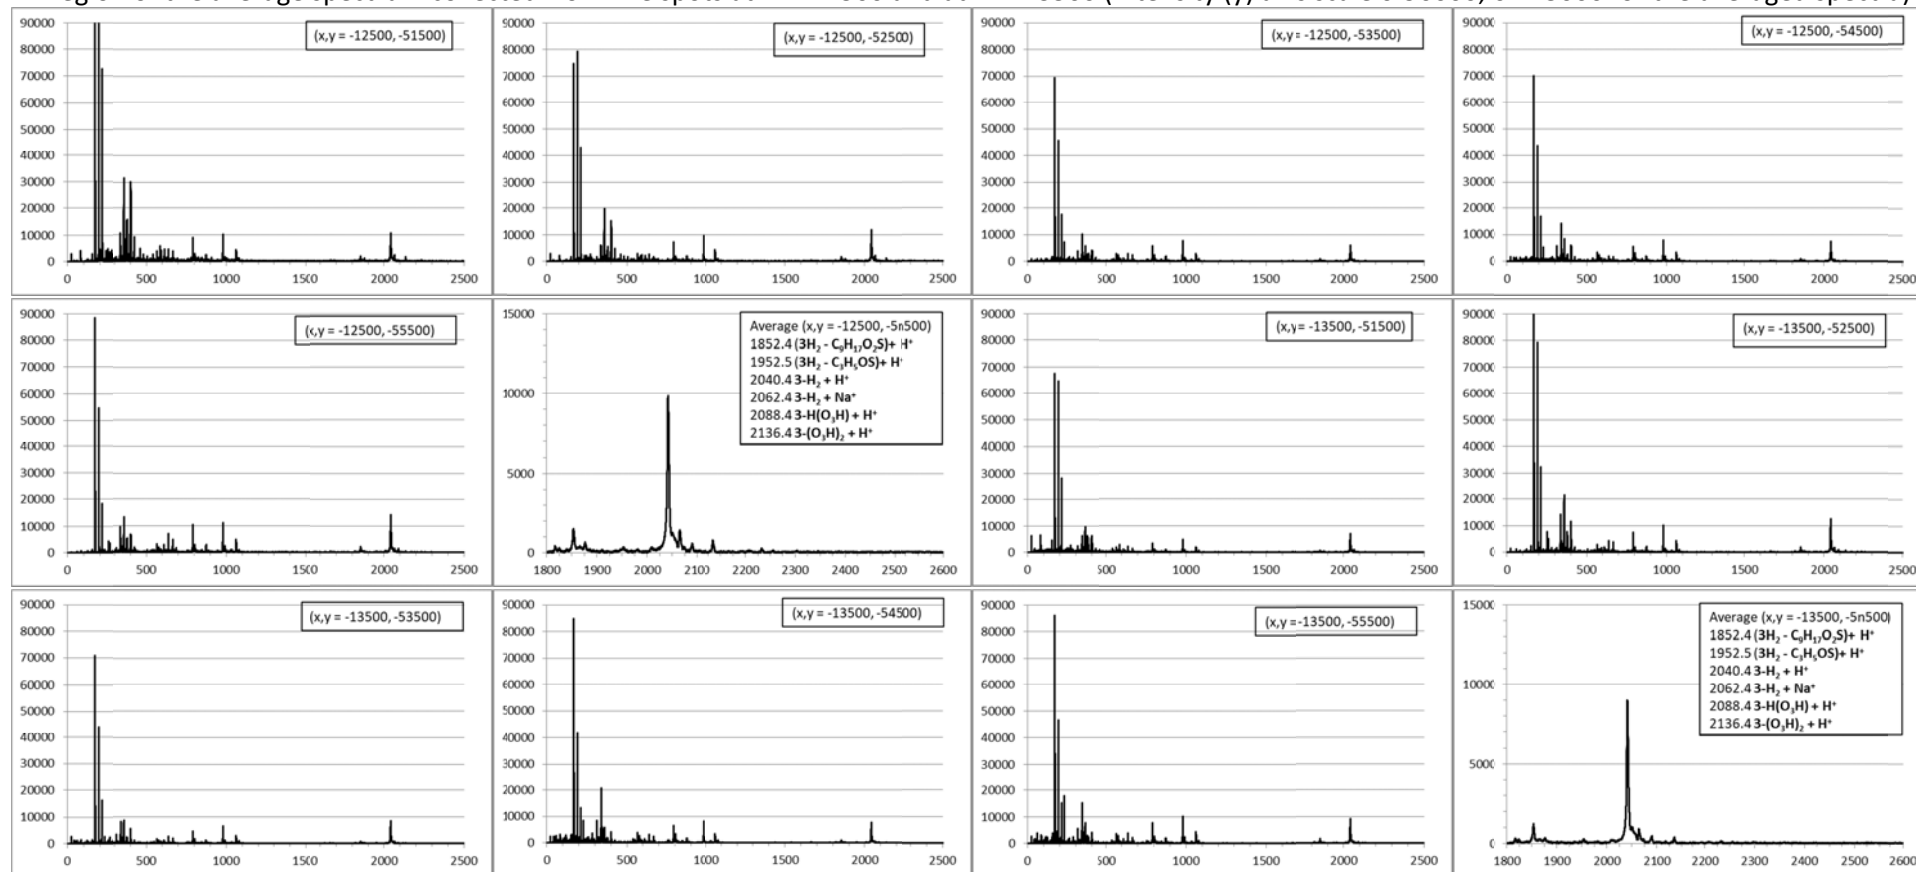

d) **3-H<sub>2</sub>** monolayer on HOPG prepared by DTT reduction after (**3**)<sub>x</sub> monolayer incubation for 21 hours in 60°C oDCB: 10 sampled spots. 0-2.5kD region and 1.8-2.6 kD region of the average spectrum collected from five spots at x = -12500 and at x = -13500 (ntensity (y) scale 0-90000; 0 - 15000 for the averaged spectra).

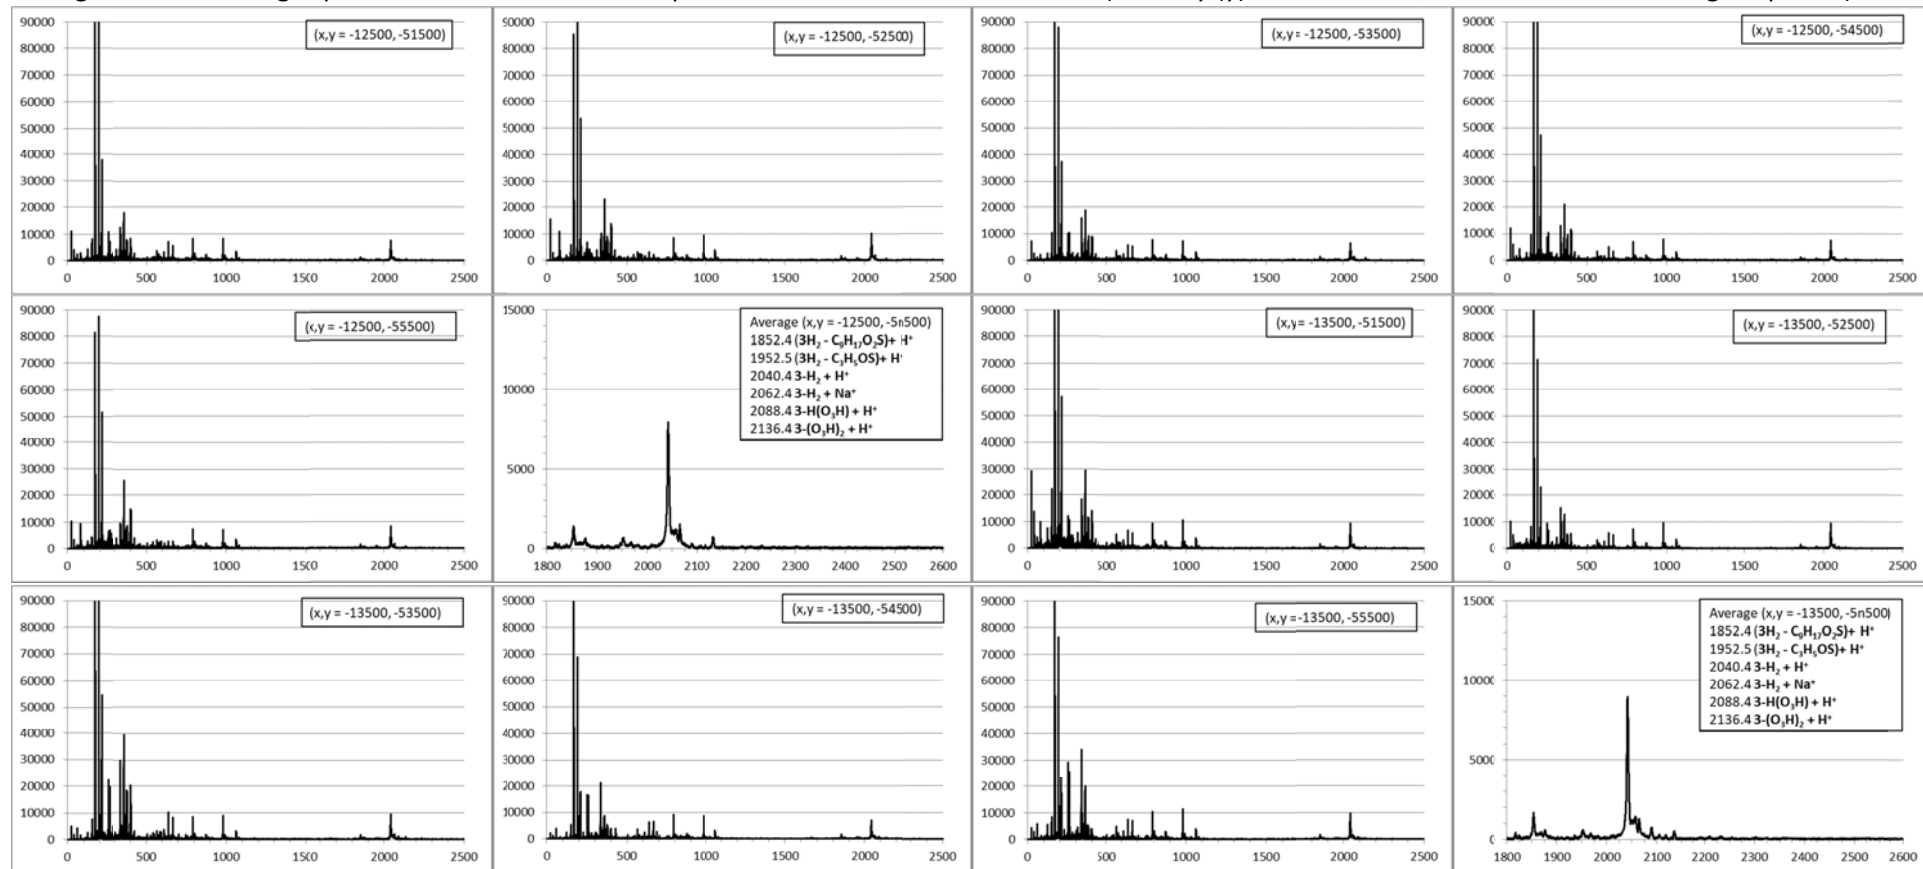

Supplement: c7cc07846c1.pdf [file c7cc07846c1.pdf]
